# Supplementary material for: Prevalence of stroke survival in rural communities living in northern Peru
Source: PLoS One. 2021 Jul 29;16(7):e0254440. doi: 10.1371/journal.pone.0254440 (PMC8321101; doi:10.1371/journal.pone.0254440)
Supplement: S1 Data — (XLSX) [file pone.0254440.s001.xlsx]

## Sheet: Sheet1
viv1b	viv1c	viv1d	viv1e	ser2a	ser2a1	ser2b	ser2c	ser2d	pavos	gallinas	patos	caballos	burros	mulas	vacas	cabritos	ovejas	cuyes	perros	gatos	cerdos	encerrado	amarrado	libre	cri4b	cri4c	cri4d	cri4e	sexo	ctipdoc	edad	cconinf	ncodfam	nrelfam	critexc	table2	cpreg01	cpreg02	cpreg03	cpreg04	cpreg05	cpreg06	cpreg07	cpreg08	_encpos	hcl	age_mg	razones_mg	hta
1	2	1	4	7	2	2	2	1	0	50	6	4	0	0	20	80	0	0	1	1	0	0	0	0		2			0	2	12	0	1	3	1
1	1	1	3	7	1	2	2	1	0	10	7	0	0	0	0	0	0	0	1	0	0	0	0	0		2			0	2	48	0	1	2	0	0
1	2	1	5	7	1	2	1	1	0	0	0	0	0	0	0	1	0	0	1	1	1	1	0	0	5	1	2	2	1	2	17	1	1	3	0	1	0	0	0	0	0	0	0	0	0
1	1	1	4	6	1	4	1	4	0	30	10	0	0	0	0	0	0	0	1	1	0	0	0	0		2			1	2	51	1	1	5	0	1	0	0	0	0	0	0	0	0	0
1	2	1	4	4	3	2	2	1	0	10	2	6	1	0	0	15	3	0	1	2	1	0	0	1	3	1	3	6	1	2	29	1	1	3	0	1	0	0	0	0	0	0	0	0	0
1	2	1	4	2	1	2	2	5	10	140	6	0	3	0	3	40	2	0	1	0	8	0	0	8		2			0	2	15	1	1	3	0	1	0	0	0	0	0	0	0	0	0
1	2	1	2	2	1	4	1	1	0	0	4	6	0	0	0	0	0	0	0	0	0	0	0	0		2			0	2	2	0	1	3	1
1	2	1	2	5	3	4	1	1	0	20	0	0	1	0	0	6	0	0	2	0	3	0	0	3		2			0	2	1	0	1	3	1
1	2	1	3	6	1	4	2	1	0	5	3	0	0	0	0	0	0	0	2	4	0	0	0	0		1	2	3	1	2	16	1	1	3	0	1	0	0	0	0	0	0	0	0	0
1	2	1	2	7	1	2	2	1	0	12	3	0	0	0	0	0	0	0	0	0	0	0	0	0		2			1	2	14	0	1	3	1
1	2	1	3	7	1	2	2	1	0	0	5	0	0	0	0	0	0	0	1	0	0	0	0	0		1	3	2	1	2	14	0	1	3	1
1	2	1	4	4	3	4	1	5	2	10	2	0	0	0	0	2	0	0	1	0	1	0	0	1		2			1	2	3	0	1	1	1
1	2	2	3	7	3	2	2	1	3	0	0	0	6	0	3	20	0	0	2	0	2	0	0	0		2			0	2	3	0	2	3	1
1	2	1	5	6	1	1	3	1	4	6	2	0	0	0	0	30	3	0	1	1	2	2	0	0	5	1	2	1	1	2	32	1	1	3	0	1	0	0	0	0	0	0	0	0	0
1	2	1	3	2	1	4	1	5	2	3	1	0	0	0	0	0	0	0	10	1	0	0	0	0		2			1	2	42	1	1	1	0	1	0	0	0	0	0	0	0	0	0
1	2	1	5	4	3	2	2	1	9	20	5	0	1	0	0	50	0	0	4	1	0	0	0	0		2			0	2	1	0	1	3	1
1	2	2	5	7	1	2	2	1	4	0	11	0	0	0	0	0	0	0	4	2	2	2	0	0	3	1	2	2	1	2	7	0	2	3	1
1	2	1	5	7	1	2	2	1	0	4	2	0	0	0	0	0	0	0	0	0	0	0	0	0		2			1	2	22	1	1	3	0	1	0	0	0	0	0	0	0	0	0
1	2	1	3	7	1	4	1	4	0	8	0	0	0	0	0	0	0	0	1	0	0	0	0	0		2			1	2	6	0	1	3	1
1	2	2	4	7	1	2	2	1	0	0	0	0	0	0	0	0	0	0	0	0	0	0	0	0		2			0	3	0		2	3	1
1	2	1	4	5	3	2	2	5	12	0	1	0	0	0	0	0	0	0	2	0	2	0	0	2	5	1	1	2	1	2	18	0	2	3	0	0
1	1	1	3	7	1	2	2	1	0	0	0	0	0	0	0	0	0	0	1	0	0	0	0	0		2			0	2	5	0	1	3	1
2	2	1	3	7	1	2	2	1	0	0	0	0	0	0	0	0	0	0	0	0	0	0	0	0		2			0	2	31	1	1	2	0	1	0	0	0	0	0	0	0	0	0
1	2	1	5	2	1	2	2	1	12	12	2	0	1	0	1	0	0	0	2	2	10	0	0	10	5	1	2	2	1	2	45	1	1	1	0	1	0	0	0	0	0	0	0	0	0
1	2	1	3	6	1	2	2	4	0	0	0	0	0	0	0	0	0	0	0	0	0	0	0	0		2			0	2	10	0	1	3	1
1	2	2	5	4	2	2	2	1	30	33	15	20	3	2	30	150	0	0	1	0	1	0	0	1		2			1	2	36	1	2	1	0	1	0	0	0	0	0	0	0	0	0
3	2	1	2	6	1	4	1	4	0	11	0	0	0	0	0	0	0	0	0	0	1	1	0	0	5	1	2	3	0	2	22	1	1	2	0	1	0	0	0	0	0	0	0	0	0
1	2	1	3	7	1	4	1	1	0	7	6	0	0	0	0	0	0	0	0	0	0	0	0	0		2			1	2	29	1	1	1	0	1	0	0	0	0	0	0	0	0	0
1	1	1	4	6	1	1	2	1	0	0	0	0	0	0	0	0	0	0	1	0	1	1	0	0	3	1	2	2	1	2	20	1	1	3	0	1	0	0	0	0	0	0	0	0	0
1	2	1	4	7	1	2	2	4	0	12	12	0	0	0	2	0	6	0	0	0	2	2	0	0	5	1	1	2	0	2	38	1	1	2	0	1	0	0	0	0	0	0	0	0	0
1	2	1	5	3	1	4	1	1	0	10	0	0	20	3	10	50	0	0	2	0	12	0	0	12	5	1	3	2	1	2	71	1	1	1	0	1	0	0	0	0	0	0	0	0	0
1	2	1	3	6	1	4	2	4	6	2	9	0	0	0	0	0	0	0	0	0	1	1	0	0	5	1	1	5	1	2	3	0	1	3	1
1	2	1	4	7	1	2	2	1	0	0	2	0	0	0	0	0	0	0	5	0	0	0	0	0		2			0	2	6	0	1	3	1
1	2	1	3	4	3	2	2	5	0	3	0	0	1	0	2	4	0	0	2	4	4	0	0	4	5	1	1	2	0	2	4	0	1	3	1
1	2	1	2	7	2	4	2	1	0	0	0	0	0	0	0	0	0	0	2	0	0	0	0	0		2			1	2	23	1	1	1	0	1	0	0	0	0	0	0	0	0	0
1	2	1	6	6	1	1	3	1	0	15	6	0	0	0	0	0	0	0	4	1	0	0	0	0		2			1	2	55	1	1	1	0	1	0	0	0	0	0	0	0	0	0
1	2	1	4	7	1	4	1	1	0	6	0	0	0	0	0	0	0	0	0	0	2	2	0	0	6	1	1	2	1	2	10	0	1	3	1
1	1	2	5	7	2	2	2	1	0	0	0	0	0	0	0	0	0	0	10	0	1	1	0	0	5	1	1	2	1	3	2	0	2	3	1
1	2	1	4	7	3	2	2	1	2	10	10	0	1	0	0	0	0	0	1	1	2	2	0	0	5	1	1	2	0	2	5	0	1	3	1
1	2	1	2	6	1	4	1	5	0	16	2	0	0	0	0	0	0	0	1	0	0	0	0	0		2			0	2	27	1	1	2	0	1	0	0	0	0	0	0	0	0	0
1	2	1	3	5	3	2	2	4	0	0	0	0	0	0	0	0	0	0	0	1	0	0	0	0		2			0	2	2	0	1	3	1
1	2	1	4	7	2	2	2	1	0	4	2	0	0	0	0	0	0	0	2	0	3	3	0	0	5	1	1	2	1	2	23	1	1	3	0	1	0	0	0	0	0	0	0	0	0
1	2	2	4	7	2	2	2	1	1	2	20	0	0	0	0	0	0	0	2	2	6	2	0	4	5	1	1	2	0	2	65	1	1	2	0	1	0	0	0	0	0	0	0	0	0
1	2	1	3	7	1	2	2	1	0	7	0	0	0	0	0	0	0	0	1	0	0	0	0	0		2			0	2	16	1	1	2	0	1	0	0	0	0	0	0	0	0	0
1	2	1	6	7	2	2	2	1	0	5	0	0	1	0	0	0	0	0	2	0	3	0	0	3	3	1	3	2	1	2	11	0	1	3	1
1	1	2	5	7	1	2	2	1	0	0	0	0	2	0	0	0	0	0	1	0	1	1	0	0	3	1	2	2	1	2	23	1	1	1	0	1	0	0	0	0	0	0	0	0	0
1	2	1	2	6	1	4	1	4	0	0	0	0	0	0	0	0	0	0	0	0	0	0	0	0		2			1	2	11	0	1	3	1
1	2	1	3	7	1	2	2	4	0	2	0	0	0	0	0	0	0	0	0	0	1	0	1	0		2			1	2	2	0	1	3	1
1	2	1	5	7	1	4	1	1	0	2	0	0	0	0	0	0	0	0	1	4	1	1	0	0	5	1	1	3	0	2	3	0	1	3	1
1	3	1	3	7	1	2	2	1	0	40	5	0	0	0	0	0	0	0	1	1	3	3	0	0	3	1	1	2	0	2	2	0	1	3	1
1	2	1	3	7	3	2	2	1	0	3	2	0	1	0	3	5	0	0	2	1	4	0	0	4	5	1	2	2	1	2	23	1	1	3	0	1	0	0	0	0	0	0	0	0	0
1	2	1	4	7	1	1	1	1	0	0	0	0	0	0	5	0	0	0	2	0	2	0	2	0		2			1	2	7	0	1	3	1
1	2	2	5	6	2	4	1	5	0	6	5	0	0	0	0	0	0	0	4	0	0	0	0	0		1	2	2	1	2	14	0	1	3	1
1	2	1	2	7	3	2	2	4	0	20	5	0	0	0	0	0	0	0	0	0	2	2	0	0	3	1	2	2	0	2	1		1	3	1
1	2	2	2	7	2	2	2	1	0	3	10	0	0	0	0	0	0	0	1	0	0	0	0	0		2			1	I	30	1	1	1	0	1	0	0	0	0	0	0	0	0	0
1	2	1	4	7	1	2	2	4	0	3	2	0	0	0	0	0	0	0	0	0	0	0	0	0		2			1	2	16	1	1	3	0	1	0	0	0	0	0	0	0	0	0
1	2	2	3	7	3	4	1	1	18	15	8	0	1	0	4	10	0	0	1	0	2	0	0	0		2			1	2	23	1	2	1	0	1	0	0	0	0	0	0	0	0	0
1	2	1	2	4	3	2	2	4	0	30	0	0	1	0	2	0	0	0	1	0	2	0	0	2		2			0	2	0		1	3	1
1	2	1	5	7	1	2	2	1	0	10	5	0	0	0	0	0	0	0	0	1	4	4	0	0	3	1	1	2	1	2	11	0	1	8	1
1	2	1	5	7	1	2	2	1	0	12	0	0	2	0	0	0	0	0	2	0	0	0	0	0		2			0	2	33	1	1	2	0	1	0	0	0	0	0	0	0	0	0
1	1	1	5	7	1	1	3	1	0	20	0	0	0	0	0	0	0	0	0	2	2	2	0	0	3	1	1	3	1	2	10	0	1	3	1
1	2	1	3	6	1	4	1	4	0	2	5	0	0	0	0	0	0	0	1	1	3	3	0	0	5	1	1	3	1	2	2	0	1	3	1
1	2	1	5	7	1	2	2	1	0	0	0	0	0	0	0	0	0	0	1	0	0	0	0	0		1	1	6	0	2	16	0	1	3	0	0
1	2	1	5	7	1	2	2	4	0	7	17	0	0	0	0	0	0	0	2	0	13	13	0	0	5	1	2	2	1	2	55	1	1	1	0	1	0	0	0	0	0	0	0	0	0
2	2	1	5	2	1	4	1	4	30	10	5	0	0	0	2	10	0	0	2	0	1	0	0	1		2			1	2	1	0	1	3	1
1	2	1	3	7	1	1	3	4	0	0	0	0	0	0	0	0	0	0	0	0	0	0	0	0		2			0	3	8	0	1	3	1
1	1	1	5	7	1	1	3	1	0	0	0	0	0	0	0	0	0	0	0	0	0	0	0	0		2			0	2	22	1	1	3	0	1	0	0	0	0	0	0	0	0	0
1	2	1	4	7	1	4	1	1	0	6	0	0	0	0	0	0	0	0	1	1	0	0	0	0		2			1	2	8	0	1	3	1
1	1	1	5	7	2	2	2	1	0	0	0	0	0	0	0	0	0	0	0	0	0	0	0	0		2			0	2	4	0	1	3	1
1	2	1	3	7	3	2	2	1	0	12	0	0	0	0	0	0	0	0	0	0	0	0	0	0		2			1	2	13	0	1	3	1
1	2	1	4	7	2	4	1	1	0	3	0	0	1	0	3	30	0	0	1	0	2	0	0	2	5	1	1	2	1	2	9	0	1	3	1
3	2	1	2	7	1	2	1	1	0	0	0	0	0	0	0	0	0	0	0	0	0	0	0	0		2			1	2	24	1	1	1	0	1	0	0	0	0	0	0	0	0	0
1	2	2	6	7	3	2	2	1	0	8	0	0	0	0	0	12	0	0	1	2	2	0	0	2	6	1	1	6	0	2	45	1	1	2	0	1	0	0	0	0	0	0	0	0	0
1	2	1	2	7	3	2	2	1	0	0	7	0	0	0	0	0	0	0	1	0	0	0	0	0		2			0	2	9	0	1	3	1
1	2	1	2	7	1	2	2	1	2	15	0	0	0	0	0	0	0	0	0	0	2	2	0	0	5	1	2	2	1	2	24	1	1	1	0	1	0	0	0	0	0	0	0	0	0
3	2	1	3	7	1	2	2	1	0	1	10	0	0	0	0	0	0	0	0	0	0	0	0	0		2			1	2	26	1	1	1	0	1	0	0	0	0	0	0	0	0	0
1	2	1	3	7	1	1	3	4	1	2	0	2	2	0	0	0	0	0	2	1	0	0	0	0		2			1	2	11	0	1	3	1
1	2	1	3	7	1	2	2	1	8	20	9	0	0	0	0	0	0	0	1	1	3	3	0	0	5	1	1	3	1	2	17	1	1	3	0	1	0	0	0	0	0	0	0	0	0
1	2	1	3	7	1	2	2	1	0	0	0	0	0	0	0	0	0	0	0	0	0	0	0	0		2			0	2	8	0	1	3	1
1	2	2	4	7	1	2	2	1	0	0	0	0	0	0	0	0	0	0	0	0	0	0	0	0		2			1	2	58	1	1	3	0	1	0	0	0	0	0	0	0	0	0
1	1	1	3	7	1	1	3	1	0	2	2	0	0	0	0	0	0	0	1	0	1	1	0	0	5	1	2	2	1	2	28	1	1	1	0	1	0	0	0	0	0	0	0	0	0
1	2	1	4	7	1	2	1	1	0	0	0	0	0	0	0	0	0	0	0	0	0	0	0	0		2			1	2	0		1	3	1
1	2	2	3	7	1	2	2	1	0	0	0	0	0	0	0	0	0	0	1	0	0	0	0	0		2			0	2	6	0	2	3	1
1	2	1	3	7	1	2	1	4	0	0	0	0	0	0	0	0	0	0	0	0	0	0	0	0		1	1	3	1	2	9	0	1	3	1
3	2	1	3	7	2	2	2	1	0	0	0	0	1	0	0	10	0	0	1	0	2	0	0	0		2			0	1	55	1	1	9	0	1	0	0	0	0	0	0	0	0	0
1	2	1	5	5	3	2	2	1	1	12	5	0	0	0	0	0	10	0	0	2	1	1	0	0	5	1	1	2	1	2	38	0	1	3	0	0
1	2	1	3	7	2	2	2	1	1	3	0	0	0	0	0	0	0	0	1	1	2	0	1	1	5	1	3	2	1	2	40	1	1	1	0	1	0	0	0	0	0	0	0	0	0
2	2	1	2	2	1	4	1	1	0	3	10	0	0	0	0	0	0	0	0	0	0	0	0	0		2			1	3	3	0	1	3	1
1	2	1	3	7	1	4	1	4	0	0	0	0	0	0	0	0	0	0	0	1	0	0	0	0		2			1	2	30	1	1	1	0	1	0	0	0	0	0	0	0	0	0
1	1	1	5	7	1	1	2	1	2	3	0	2	0	0	20	0	7	0	5	1	1	1	0	0	3	1	1	1	0	2	13	0	1	3	1
1	2	1	1	7	1	4	1	1	0	0	3	0	0	0	0	0	0	0	0	0	1	0	1	0		2			0	2	4	0	1	3	1
1	1	1	3	7	1	1	3	1	0	0	0	0	0	0	0	0	0	0	1	0	0	0	0	0		2			1	2	13	0	1	7	1
1	2	1	3	7	2	2	2	1	1	3	0	0	0	0	0	0	0	0	1	1	2	0	1	1	5	1	3	2	1	2	21	0	1	3	0	0
1	2	1	4	7	3	2	1	1	0	0	0	0	0	0	0	0	0	0	3	1	1	1	0	0	3	1	1	2	1	2	64	1	1	1	0	1	0	0	0	0	0	0	0	0	0
1	1	1	3	7	1	2	2	1	0	15	0	0	0	0	0	180	0	0	2	1	0	0	0	0		2			0	2	14	0	1	3	1
3	2	1	3	7	1	4	1	1	0	0	0	0	0	0	0	0	0	0	0	0	0	0	0	0		2			1	2	22	1	1	1	0	1	0	0	0	0	0	0	0	0	0
1	2	1	2	2	1	4	1	4	0	0	0	0	0	0	0	0	0	0	0	1	0	0	0	0		2			1	2	5	0	1	3	1
1	2	1	1	6	1	4	1	5	0	0	12	0	0	0	0	0	0	0	1	0	0	0	0	0		2			1	2	50	1	1	1	0	1	0	0	0	0	0	0	0	0	0
1	2	1	2	5	3	4	1	5	0	20	0	0	0	0	0	0	0	0	2	0	1	0	0	1		2			0	3	0		1	3	1
1	2	2	3	7	1	4	1	1	0	2	0	0	0	0	0	0	0	0	0	0	0	0	0	0		1	2	3	1	2	11	0	1	3	1
1	2	2	3	7	3	2	2	1	1	25	0	4	3	0	1	6	0	0	2	0	5	0	0	0		2			0	2	0		2	3	1
2	2	1	2	7	1	1	3	1	4	9	15	0	0	0	0	0	0	0	1	2	0	0	0	0		1	1	3	0	2	3	0	1	3	1
1	1	1	5	7	1	2	2	1	0	0	0	0	0	0	0	0	0	0	0	1	0	0	0	0		2			0	2	5	0	1	3	1
1	2	1	4	7	3	2	2	1	0	0	0	0	0	0	0	0	0	0	0	0	0	0	0	0		2			0	2	6	0	1	3	1
1	2	1	3	7	1	1	3	1	0	12	0	0	0	0	0	0	0	0	0	0	0	0	0	0		1	1	3	1	2	60	1	1	1	0	1	0	1	0	0	0	1	0	1	1	832	61	1	1
1	2	2	3	7	2	2	2	1	0	0	0	0	0	0	0	0	0	0	0	0	0	0	0	0		1	2	2	0	2	28	1	2	2	0	1	0	0	0	0	0	0	0	0	0
1	2	2	4	5	3	2	2	1	0	23	0	1	2	0	2	20	0	0	6	0	2	2	0	0	5	1	2	2	0	2	20	1	1	3	0	1	0	0	0	0	0	0	0	0	0
1	2	1	4	7	1	1	3	1	0	0	0	0	0	0	0	0	0	0	0	0	0	0	0	0		2			0	2	21	1	1	3	0	1	0	0	1	0	0	0	0	0	0
1	2	1	4	7	1	1	3	1	0	0	0	0	0	0	0	0	0	0	0	0	0	0	0	0		2			1	3	19	0	1	3	0	0
1	2	2	4	7	2	2	2	1	2	4	0	0	0	0	1	0	0	0	5	1	2	2	0	0		2			1	2	5	0	2	3	1
1	2	1	4	2	1	4	1	1	3	10	2	0	0	0	0	11	0	0	1	0	0	0	0	0		2			1	2	2	0	1	3	1
1	2	1	4	7	2	2	2	1	0	1	1	3	0	0	10	2	0	0	1	1	4	0	0	4		2			1	2	36	1	1	1	0	1	0	0	0	0	0	0	0	0	0
1	2	1	2	2	1	4	1	1	0	0	4	0	0	0	0	0	0	0	1	0	0	0	0	0		2			1	2	9	0	1	3	1
1	2	1	2	6	1	4	1	1	0	0	0	0	0	0	0	0	0	0	0	0	0	0	0	0		2			0	2	12	0	1	3	1
1	2	2	3	7	1	2	2	1	0	6	14	0	0	0	0	0	0	0	2	2	9	0	0	9		2			0	2	26	1	1	3	0	1	0	0	0	0	0	0	0	0	0
1	1	1	2	7	1	2	2	1	0	0	0	0	0	0	0	0	0	0	1	0	0	0	0	0		1	1	3	0	3	2	0	1	3	1
1	2	1	4	6	1	2	2	4	0	0	0	0	0	0	0	0	0	0	0	0	0	0	0	0		2			1	2	30	0	1	1	0	0
1	2	1	3	7	1	2	2	1	0	0	6	0	0	0	0	0	0	0	0	0	5	5	0	0	3	1	1	2	0	3	3	0	1	8	1
1	2	1	2	6	2	4	2	4	0	0	0	0	0	0	0	0	0	0	0	0	3	3	0	0	5	1	1	3	0	2	19	1	1	2	0	1	0	0	0	0	0	0	0	0	0
1	1	1	4	7	2	4	1	1	0	6	0	0	1	0	0	0	0	0	0	1	0	0	0	0		2			1	2	33	1	1	1	0	1	0	0	0	0	0	0	1	0	0
1	2	1	5	7	2	4	1	1	0	1	15	0	0	0	0	0	0	0	0	0	5	5	0	0	3	1	2	2	1	2	22	1	1	3	0	1	0	0	0	0	0	0	0	0	0
1	2	1	2	3	1	4	1	1	1	0	0	0	0	0	0	0	0	0	0	0	0	0	0	0		2			0	2	6	0	1	3	1
1	2	1	3	7	1	2	2	1	0	20	10	0	0	0	0	200	0	0	7	0	9	9	0	0	6	1	2	2	1	2	33	1	1	1	0	1	0	0	0	0	0	0	0	0	0
1	2	2	4	4	3	2	2	5	6	10	4	2	5	0	22	0	100	0	5	2	31	31	0	0	5	1	3	2	0	2	2	0	2	3	1
1	2	1	1	6	1	4	1	1	0	0	0	1	1	0	100	0	0	0	3	0	0	0	0	0		2			1	2	33	1	1	7	0	1	0	0	0	0	0	0	0	0	0
1	2	1	3	7	3	4	1	5	0	7	0	0	0	0	1	0	0	0	1	0	10	0	0	0		2			1	2	11	0	1	3	1
1	2	2	4	6	1	4	1	5	0	5	17	0	0	0	0	0	0	0	1	0	0	0	0	0		2			0	3	2	0	2	3	1
1	2	1	3	5	3	2	2	1	0	38	24	0	1	0	2	0	0	0	3	0	2	2	0	0	5	1	2	2	1	2	15	1	1	3	0	1	0	0	0	0	0	0	0	0	0
1	2	1	3	4	3	4	1	4	0	0	0	0	0	0	0	0	0	0	1	0	4	4	0	0	5	1	1	2	1	3	17	1	1	3	0	1	0	0	0	0	0	0	0	0	0
1	2	1	4	7	2	2	2	1	0	6	0	0	0	0	0	0	0	0	1	0	1	1	0	0	5	1	1	2	1	2	34	1	1	3	0	1	0	0	0	0	0	0	0	0	0
1	2	1	6	2	1	2	2	1	0	15	2	5	4	0	2	0	5	0	4	4	5	5	0	0	5	1	1	2	0	2	30	1	3	2	0	1	0	0	0	0	0	0	0	0	0
1	2	1	3	7	2	2	2	1	1	1	0	0	0	0	0	0	0	0	1	1	0	0	0	0		1	1	3	0	2	1	0	1	3	1
1	2	1	2	6	1	4	2	1	0	0	1	0	0	0	0	0	0	0	0	0	0	0	0	0		2			0	2	0		1	3	1
1	2	1	2	7	1	1	3	1	0	0	0	0	0	0	0	0	0	0	1	0	0	0	0	0		2			0	2	7	0	1	3	1
2	2	1	3	6	1	4	1	4	0	0	0	0	0	0	0	0	0	0	0	0	0	0	0	0		2			1	2	26	1	1	1	0	1	0	0	0	0	0	0	0	0	0
1	2	1	2	7	1	4	1	1	0	0	0	0	0	0	0	0	0	0	0	0	0	0	0	0		2			1	2	1		1	3	1
1	1	2	4	5	3	4	1	4	0	7	2	0	0	0	0	0	0	0	3	0	2	0	0	2	5	1	2	6	0	2	0		2	3	1
1	2	1	3	5	3	2	1	4	9	26	2	0	3	0	0	5	0	0	1	0	9	0	2	7		2			1	2	18	1	1	3	0	1	0	0	0	0	0	0	0	0	0
1	2	1	3	2	1	4	1	5	9	14	1	0	0	0	0	4	0	0	3	0	1	0	0	1	5	1	2	2	1	2	18	1	1	3	0	1	0	0	0	0	0	0	0	0	0
1	4	1	3	4	1	4	2	5	0	4	0	0	0	0	0	0	0	0	0	0	2	0	0	2		2			0	2	3	0	1	3	1
1	2	1	2	7	1	4	2	4	1	0	0	0	0	0	0	0	0	0	0	0	0	0	0	0		2			0	2	4	0	1	3	1
1	2	1	5	7	1	1	3	1	0	0	8	0	0	0	1	0	0	0	0	1	1	1	0	0	3	1	1	2	0	2	33	1	1	2	0	1	0	0	0	0	0	0	0	0	0
1	2	1	3	7	1	1	3	1	0	0	0	0	0	0	0	0	0	0	0	0	3	0	0	3		2			1	2	14	0	1	3	1
1	1	1	2	7	1	1	3	1	0	4	0	0	0	0	0	0	0	0	0	0	3	3	0	0	5	1	1	2	1	2	6	0	1	3	1
1	2	1	4	7	1	2	2	1	0	2	4	0	0	0	0	0	0	0	0	3	0	0	0	0		2			0	2	14	0	1	3	1
1	2	1	3	7	1	2	2	1	0	0	0	0	0	0	0	0	0	0	0	0	0	0	0	0		1	2	3	1	2	40	1	1	1	0	1	0	0	0	0	0	0	0	0	0
1	2	1	3	5	3	4	1	5	0	20	4	0	1	0	0	0	0	0	1	1	20	20	0	0	5	1	1	2	1	2	19	1	1	3	0	1	0	0	0	0	0	0	0	0	0
1	2	1	2	7	1	2	2	1	0	2	2	0	0	0	0	0	0	0	0	0	2	2	0	0	3	1	2	2	0	2	3	0	1	3	1
1	2	1	2	6	1	4	1	4	0	1	1	1	0	0	0	0	0	0	1	1	2	0	0	2		2			1	2	1	0	1	3	1
1	1	1	4	7	1	1	3	1	0	1	7	0	0	0	0	0	0	0	0	0	0	0	0	0		1	1	3	0	2	1	0	1	3	1
1	1	1	4	7	1	2	2	1	0	4	12	0	0	0	0	0	0	0	0	0	0	0	0	0		2			1	2	7	0	1	3	1
1	1	1	3	7	1	4	2	1	0	0	0	0	0	0	0	0	0	0	0	0	0	0	0	0		2			1	2	40	1	1	1	0	1	0	0	0	0	0	0	0	0	0
1	1	1	3	3	1	2	2	1	0	5	0	0	0	0	0	0	0	0	2	0	4	4	0	0	3	1	2	2	0	2	5	0	1	3	1
1	2	2	4	7	1	2	2	4	0	4	0	0	1	0	1	0	3	0	2	0	1	1	0	0	3	1	1	2	0	2	2	0	2	3	1
1	2	1	3	7	1	2	2	1	0	2	6	0	0	0	0	0	0	0	0	0	0	0	0	0		2			0	2	8	0	1	3	1
1	1	2	3	7	1	1	3	1	0	0	0	0	0	0	0	0	0	0	2	0	0	0	0	0		2			1	2	48	0	1	1	0	0
1	2	2	4	6	1	2	2	1	0	0	21	0	0	0	0	0	0	0	1	0	0	0	0	0		2			1	2	15	1	1	3	0	1	0	0	0	0	0	0	0	0	0
1	2	1	3	6	1	2	2	4	0	0	0	0	0	0	0	0	0	0	1	0	0	0	0	0		2			0	2	0		1	3	1
1	2	1	3	6	1	2	2	4	0	0	0	0	0	0	0	0	0	0	1	0	0	0	0	0		2			1	2	6	0	1	3	1
1	1	1	1	6	1	2	2	4	0	0	0	0	0	0	0	0	0	0	0	0	0	0	0	0		2			1	2	0		1	3	1
1	1	1	4	7	1	2	2	1	0	0	6	0	0	0	0	0	0	0	0	0	1	0	1	0		2			1	2	15	1	1	3	0	1	0	0	0	0	0	0	0	0	0
1	2	1	3	7	1	2	2	1	0	0	0	0	0	0	0	0	0	0	0	0	0	0	0	0		2			0	2	28	1	1	2	0	1	0	0	0	0	0	0	0	0	0
1	2	1	2	7	2	4	1	1	0	8	0	0	2	0	0	50	0	0	0	0	1	0	0	1	5	1	2	2	1	2	27	0	1	1	0	0
1	2	2	6	7	3	2	2	1	0	2	0	0	1	0	0	0	0	0	2	0	1	1	0	0	5	1	1	3	1	2	4	0	2	3	1
1	2	1	4	7	1	1	3	1	0	10	3	0	0	0	0	0	0	0	0	0	1	1	0	0	3	1	2	2	1	2	6	0	1	3	1
1	2	1	3	7	3	2	2	1	0	2	2	0	0	0	0	0	0	0	1	0	0	0	0	0		2			0	2	2	0	1	3	1
1	2	1	2	6	1	4	1	4	0	0	0	0	0	0	0	0	0	0	0	0	0	0	0	0		2			0	2	22	1	1	2	0	1	0	0	0	0	0	0	0	0	0
1	2	2	5	5	2	2	2	1	1	0	20	0	0	0	0	2	0	0	1	0	3	3	0	0	3	1	1	2	0	2	4	0	2	3	1
1	2	1	2	7	2	4	1	1	0	0	8	0	0	0	3	0	0	0	1	0	0	0	0	0		2			0	2	4	0	1	3	1
1	2	1	3	7	1	2	2	1	0	9	31	0	0	0	0	0	0	0	0	0	0	0	0	0		2			1	2	0		1	3	1
1	2	1	2	6	1	4	2	1	0	0	0	0	0	0	0	0	0	0	0	0	0	0	0	0		2			1	2	42	0	1	1	0	0
1	2	1	3	7	3	4	1	4	0	11	3	0	0	0	0	0	0	0	0	0	0	0	0	0		2			1	2	36	1	1	1	0	1	0	0	0	0	0	0	0	0	0
1	2	1	3	2	1	4	1	5	9	14	1	0	0	0	0	4	0	0	3	0	1	0	0	1	5	1	2	2	1	2	3	0	1	3	1
3	2	1	2	6	1	1	3	1	2	0	0	0	0	0	2	0	0	0	0	0	1	1	0	0	6	1	1	3	0	2	6	0	1	3	1
1	2	1	2	7	1	2	2	1	0	0	0	0	0	0	0	0	0	0	0	0	0	0	0	0		2			1	2	11	0	1	8	1
1	2	2	4	6	1	2	1	1	0	0	0	0	0	0	0	0	0	0	2	3	0	0	0	0		2			0	2	5	0	2	3	1
1	2	1	6	7	1	2	2	1	0	2	8	0	0	0	0	0	0	0	0	1	0	0	0	0		1	1	3	0	2	14	0	1	3	1
1	1	2	4	7	2	2	2	1	0	0	7	0	0	0	0	0	0	0	1	1	0	0	0	0		2			1	2	2	0	2	3	1
1	1	1	5	3	1	2	2	1	0	0	0	0	0	0	0	0	0	0	0	0	1	1	0	0	3	1	2	2	1	2	46	1	1	1	0	1	0	0	0	0	0	0	0	0	0
1	2	1	3	7	1	2	2	1	0	4	0	0	1	0	4	0	0	0	2	0	0	0	0	0		2			0	2	9	0	1	3	1
1	2	1	3	7	1	4	2	1	0	0	10	0	0	0	0	0	0	0	5	0	17	17	0	0	6	1	1	2	1	2	33	1	1	1	0	1	0	0	0	0	0	0	0	0	0
1	2	1	1	7	1	1	3	5	0	0	2	0	3	0	0	0	0	0	8	1	1	1	0	0	3	1	1	2	1	2	61	1	1	1	0	1	0	0	0	0	0	0	0	0	0
1	2	1	2	7	2	2	2	1	0	0	0	0	0	0	0	0	0	0	0	0	4	4	0	0	5	1	1	2	1	2	5	0	1	3	1
1	2	2	5	5	2	2	2	1	0	13	0	0	0	0	0	0	0	0	4	2	0	0	0	0		1	1	2	1	2	23	1	2	1	0	1	0	0	0	0	0	0	1	0	0
1	2	2	5	2	1	2	2	1	0	3	4	0	1	0	1	4	0	0	4	0	0	0	0	0		2			1	2	3	0	2	3	1
1	1	1	3	3	1	1	3	1	0	0	0	0	0	0	0	0	0	0	0	0	0	0	0	0		1	1	1	0	2	2	0	1	3	1
1	2	1	4	7	1	2	2	1	0	20	7	0	0	0	0	0	0	0	2	1	0	0	0	0		2			1	2	11	0	1	3	1
1	1	1	3	7	2	2	2	1	0	0	0	0	0	0	0	0	0	0	0	0	0	0	0	0		2			1	2	11	0	1	3	1
1	2	1	4	6	2	4	2	1	0	0	0	0	0	0	0	0	0	0	0	0	0	0	0	0		2			0	2	47	0	1	2	0	0
1	2	1	7	7	2	2	2	1	0	4	3	3	0	0	2	13	0	0	5	2	0	0	0	0		1	1	2	0	2	1	0	1	3	1
1	2	1	4	7	1	2	2	1	5	2	0	0	0	1	5	0	0	0	2	0	0	0	0	0		2			1	2	10	0	1	3	1
1	2	1	4	7	2	2	2	1	1	10	0	0	0	0	0	0	0	0	0	0	2	0	0	2	3	1	1	2	1	2	30	1	1	3	0	1	0	0	0	0	0	0	0	0	0
2	2	1	2	7	1	1	3	1	0	0	10	0	0	0	0	0	0	0	1	0	0	0	0	0		2			1	2	5	0	1	3	1
1	1	1	5	7	1	1	3	1	0	20	22	0	0	0	0	0	0	0	1	0	1	1	0	0	5	1	1	6	1	2	21	1	1	3	0	1	1	0	0	0	1	0	0	0	1	914	22	1	0
1	2	1	4	7	1	1	3	1	0	6	4	0	0	0	0	0	0	0	0	0	0	0	0	0		2			1	2	14	0	1	3	1
1	2	2	3	7	2	2	2	1	0	0	0	0	0	0	0	0	0	0	0	0	0	0	0	0		1	2	2	1	2	6	0	2	3	1
1	2	1	3	7	1	1	3	1	0	3	2	0	0	0	0	0	0	0	0	0	0	0	0	0		2			0	2	1		1	3	1
1	1	1	5	7	2	2	2	1	0	20	0	0	0	0	12	1	11	0	6	0	3	3	0	0	3	1	1	2	1	2	18	1	1	3	0	1	0	0	0	0	0	0	0	0	0
1	2	1	6	7	3	2	2	1	0	0	0	0	1	0	9	0	0	0	0	0	2	0	0	0		2			1	2	6	0	1	3	1
1	2	1	3	5	3	2	2	5	5	20	6	0	0	0	0	5	0	0	2	1	8	0	0	8	5	1	2	2	0	2	1	0	1	3	1
1	1	1	3	7	1	1	3	1	0	4	60	0	0	0	0	0	0	0	1	0	0	0	0	0		1	1	3	0	2	58	1	1	2	0	1	0	0	0	0	0	0	0	0	0
1	1	1	3	7	1	1	3	1	0	0	4	0	0	0	0	0	0	0	1	0	6	6	0	0	6	1	1	3	0	2	23	1	1	3	0	1	0	0	0	0	0	0	0	0	0
1	1	1	5	5	3	2	2	3	0	10	15	1	10	1	12	50	0	0	3	0	6	6	0	0	5	1	1	2	1	6	19	1	1	3	0	1	0	0	0	0	0	0	0	0	0
1	2	1	3	2	1	4	1	1	0	1	1	0	0	0	0	0	0	0	2	1	0	0	0	0		2			1	2	9	0	1	3	1
1	2	1	5	7	2	4	1	4	0	3	0	4	2	0	5	0	0	0	0	0	3	3	0	0	5	1	1	2	1	2	8	0	1	3	1
1	2	1	3	7	2	2	2	1	2	2	3	3	3	3	30	10	0	0	2	0	9	0	0	9	6	1	1	2	1	2	15	1	1	3	0	1	0	0	0	0	0	0	0	0	0
3	2	1	2	7	1	2	2	1	4	2	7	0	0	0	0	0	0	0	0	0	0	0	0	0		2			1	2	2	0	1	3	1
1	2	1	4	7	1	2	2	1	0	1	0	0	0	0	0	0	0	0	0	0	0	0	0	0		2			1	2	8	0	1	3	1
2	2	1	1	7	1	4	1	5	0	3	2	0	0	0	0	0	0	0	0	0	0	0	0	0		2			0	2	4	0	1	3	1
1	1	1	3	7	3	2	2	1	0	0	0	0	0	0	0	0	0	0	0	0	3	3	0	0	6	1	1	1	0	2	23	1	1	3	0	1	0	0	0	0	0	0	0	0	0
1	2	1	3	3	1	4	1	1	4	6	0	4	1	0	2	10	0	0	1	1	1	1	0	0	6	1	1	6	1	2	7	0	1	3	1
1	2	2	4	5	3	2	2	1	0	20	3	0	0	0	0	0	0	0	2	0	2	2	0	0	3	1	1	2	1	3	18	0	1	7	0	0
1	2	1	4	7	1	2	2	1	0	5	0	0	0	0	0	0	0	0	1	0	0	0	0	0		2			1	2	18	1	1	3	0	1	0	0	0	0	0	0	0	0	0
1	2	1	2	7	1	4	1	1	0	0	0	0	0	0	0	0	0	0	0	0	0	0	0	0		2			1	2	39	1	1	1	0	1	0	0	0	0	0	0	0	0	0
3	1	1	3	7	1	2	2	1	0	0	0	0	0	0	0	0	0	0	0	0	0	0	0	0		2			1	2	19	1	1	V	0	1	0	0	0	0	0	0	0	0	0
1	2	1	5	5	3	2	2	1	0	0	0	0	0	0	0	2	0	0	1	2	3	3	0	0	5	1	3	2	1	2	1	0	1	8	1
1	2	1	4	7	1	4	1	1	4	0	0	0	0	0	0	0	0	0	0	0	0	0	0	0		2			1	2	5	0	1	3	1
1	1	2	2	7	1	2	2	4	0	17	9	1	0	0	25	0	0	0	0	1	0	0	0	0		1	2	5	1	2	34	1	2	1	0	1	0	0	0	0	0	0	0	0	0
1	2	1	3	7	1	1	3	1	0	3	0	0	0	0	0	0	0	0	1	0	0	0	0	0		2			1	2	15	1	1	3	0	1	0	0	0	0	0	0	0	0	0
2	2	1	2	6	1	2	2	4	0	0	20	0	0	0	0	0	0	0	0	0	3	3	0	0	3	1	2	3	0	2	19	1	1	2	0	1	0	0	0	0	0	0	0	0	0
1	2	1	3	6	1	4	1	4	0	7	4	0	0	0	0	0	0	0	0	0	3	3	0	0	6	1	1	2	0	2	0		1	3	1
1	2	1	2	7	1	4	1	1	0	0	0	0	0	0	0	0	0	0	0	0	0	0	0	0		2			1	2	12	0	1	3	1
1	2	1	2	7	1	2	2	1	0	1	0	0	0	0	0	0	0	0	6	0	0	0	0	0		2			1	I	17	1	1	3	0	1	0	0	0	0	0	0	0	0	0
1	2	1	4	7	1	4	1	1	0	8	0	0	0	0	0	0	0	0	1	0	3	3	0	0	3	1	1	3	1	2	55	1	1	1	0	1	0	0	1	0	0	0	0	0	0
1	2	1	3	6	1	2	2	5	0	3	0	0	0	0	0	0	0	0	0	0	0	0	0	0		2			1	2	11	0	1	3	1
1	1	1	4	7	1	2	2	1	0	6	0	0	0	0	0	0	0	0	0	0	0	0	0	0		2			1	2	38	1	1	1	0	1	0	0	0	0	0	0	0	0	0
1	1	1	6	7	1	2	2	1	0	0	0	0	0	0	0	0	0	0	1	0	0	0	0	0		2			1	2	47	0	1	1	0	0
1	2	1	4	6	1	4	1	1	0	0	0	0	0	0	0	0	0	0	0	0	0	0	0	0		2			0	2	0		1	3	1
1	2	1	4	7	1	2	2	1	0	0	0	0	0	0	0	0	0	0	0	0	3	3	0	0	5	1	1	2	0	2	2	0	1	3	1
1	1	1	3	7	2	2	2	1	0	0	0	0	0	0	0	0	0	0	0	0	0	0	0	0		1	2	2	1	2	6	0	1	3	1
1	1	1	4	7	3	4	1	1	0	10	0	0	4	0	2	0	0	0	2	1	2	2	0	0	5	1	2	2	0	2	76	1	1	2	0	1	0	0	1	0	0	1	0	0	1	2361	77	1	1
1	1	1	4	7	2	2	2	1	0	0	0	0	0	0	0	0	0	0	0	0	1	1	0	0	3	1	1	3	1	2	9	0	1	3	1
1	2	1	2	7	1	4	1	5	0	12	0	0	0	0	0	0	0	0	1	0	5	5	0	0	5	1	1	2	1	2	36	0	1	1	0	0
1	2	1	4	5	3	4	1	4	0	8	0	0	0	0	0	6	0	0	1	0	3	3	0	0	5	1	1	2	0	3	13	0	1	3	1
1	2	2	4	7	2	2	2	1	2	4	0	0	0	0	1	0	0	0	5	1	2	2	0	0		2			1	2	76	1	1	1	0	1	0	1	1	0	1	0	0	1	1	91	77	1	1
1	2	1	3	2	1	2	2	1	0	0	6	0	0	0	0	0	0	0	0	0	0	0	0	0		1	2	2	0	2	8	0	1	3	1
2	2	1	1	6	1	2	2	5	0	0	0	0	0	0	0	0	0	0	0	0	0	0	0	0		2			1	2	26	0	1	1	0	0
1	2	1	4	7	1	2	2	1	0	10	10	0	1	0	1	0	0	0	2	0	1	1	0	0	5	1	1	3	1	2	19	1	1	3	0	1	0	0	0	0	0	0	0	0	0
1	2	2	4	5	3	4	1	4	1	10	12	2	10	0	6	100	0	0	3	0	18	0	0	18	5	1	1	2	1	2	22	1	2	1	0	1	0	0	0	0	0	0	0	0	0
1	2	1	1	6	1	4	1	5	0	0	0	0	0	0	33	0	0	0	2	0	0	0	0	0		2			1	2	48	1	1	1	0	1	0	0	1	0	0	0	0	0	0
1	1	1	4	7	1	2	2	1	4	4	5	0	0	0	0	0	0	0	1	1	0	0	0	0		2			0	2	2	0	1	3	1
1	2	1	4	7	1	2	2	1	0	4	15	0	0	0	0	0	0	0	2	1	0	0	0	0		2			1	2	33	1	1	1	0	1	0	0	0	0	0	0	0	0	0
1	1	1	4	7	3	2	2	1	0	2	0	0	0	0	0	0	0	0	0	0	2	2	0	0	3	1	2	2	1	2	4	0	1	3	1
1	2	1	3	7	2	2	2	1	0	8	2	12	2	1	0	20	0	0	3	0	1	0	0	1	5	1	1	2	1	3	13	0	1	7	1
1	2	1	4	7	3	2	2	1	0	10	0	0	0	0	0	0	0	0	2	1	10	10	0	0	5	1	1	1	1	3	14	0	1	3	1
1	2	1	5	7	2	4	1	1	2	15	0	0	1	0	0	100	10	0	2	0	4	0	0	4	3	1	2	2	1	2	11	0	1	3	1
1	2	1	2	3	1	4	1	1	0	0	2	0	0	0	0	0	0	0	3	2	0	0	0	0		2			1	2	7	0	1	3	1
1	2	2	4	2	1	2	2	1	3	1	6	0	0	0	4	3	0	0	2	2	20	10	0	10	5	1	2	3	1	2	32	1	2	1	0	1	0	0	0	0	0	0	0	0	0
1	2	1	7	4	3	2	2	1	0	2	0	0	1	0	4	30	0	0	2	0	4	0	4	0		2			1	2	23	1	1	3	0	1	0	0	0	0	0	0	0	0	0
1	2	1	2	7	1	4	1	1	0	0	0	0	0	0	0	0	0	0	0	0	0	0	0	0		2			1	2	0		1	3	1
1	1	1	3	7	1	2	2	1	0	0	0	0	0	0	0	0	0	0	3	0	0	0	0	0		2			0	2	31	1	1	3	0	1	0	0	0	0	0	0	0	0	0
1	2	1	5	7	1	2	1	1	0	20	40	0	1	0	0	0	0	0	1	1	1	1	0	0	3	1	1	2	0	3	0		1	3	1
1	2	1	3	7	2	2	2	4	0	0	0	0	0	0	0	0	0	0	1	0	0	0	0	0		2			0	2	9	0	1	3	1
1	2	1	4	7	2	2	2	1	0	8	0	0	0	0	0	7	0	0	1	0	13	0	0	0	5	1	1	2	1	2	51	1	1	1	0	1	0	0	0	0	0	0	0	0	0
1	2	1	1	2	1	4	1	4	0	0	0	0	0	0	0	0	0	0	0	0	0	0	0	0		2			0	2	5		1	3	1
1	2	1	4	6	1	2	2	1	4	2	8	0	0	0	0	0	0	0	2	1	0	0	0	0		1	1	3	0	2	19	1	1	3	0	1	0	0	0	0	0	0	0	0	0
1	2	1	4	7	2	2	2	1	0	0	0	2	4	0	0	40	0	0	0	1	0	0	0	0		2			1	2	38	1	1	3	0	1	0	0	0	0	0	0	0	0	0
2	2	1	6	7	1	2	2	1	0	0	0	0	0	0	0	0	0	0	0	0	0	0	0	0		2			0	2	9	0	1	3	1
1	2	1	5	7	3	2	2	1	2	8	0	1	0	0	3	8	0	0	2	0	2	0	0	0		2			0	2	0		1	3	1
1	2	1	2	7	2	4	1	4	0	0	0	0	0	0	0	0	0	0	0	0	0	0	0	0		2			0	2	7	0	1	3	1
1	2	1	5	7	2	2	2	1	0	0	0	0	1	0	0	0	0	0	1	0	3	0	0	3	5	1	1	2	0	2	51	0	1	2	0	0
1	2	1	2	6	1	2	2	1	0	6	0	0	1	0	0	0	0	0	0	1	0	0	0	0		1	1	2	0	2	78	1	1	2	0	1	0	1	0	0	0	0	0	0	1	121	79	1	0
3	2	1	3	7	3	2	2	1	0	3	0	0	0	0	0	0	0	0	1	0	2	0	0	0		2			1	2	16	1	1	3	0	1	0	0	0	0	0	0	0	0	0
1	2	1	2	6	1	4	3	4	0	0	0	0	0	0	0	0	0	0	0	0	0	0	0	0		2			1	2	2	0	1	3	1
1	1	1	4	7	1	4	1	1	0	3	4	0	0	0	0	0	0	0	0	1	0	0	0	0		2			0	2	16	1	1	3	0	1	0	0	0	0	0	0	0	0	0
1	2	1	4	7	3	2	2	1	0	4	0	0	0	0	0	0	0	0	0	0	3	0	0	3	5	1	1	2	0	2	1	0	1	3	1
1	1	1	3	7	1	1	3	1	0	0	0	0	0	0	0	0	0	0	1	0	0	0	0	0		2			1	2	16	1	1	3	0	1	0	0	0	0	0	0	0	0	0
1	1	1	4	7	1	4	1	1	0	5	0	0	0	0	0	0	0	0	1	2	0	0	0	0		2			0	2	8	0	1	3	1
1	2	2	3	7	3	2	2	1	0	6	0	0	0	0	0	0	0	0	0	1	0	0	0	0		2			0	2	9	0	2	3	1
2	2	1	5	7	1	2	2	1	0	0	6	0	4	0	3	0	0	0	0	1	8	8	0	0	5	1	1	3	0	2	10	0	1	3	1
1	2	2	4	7	2	2	2	1	3	4	12	1	2	0	0	150	0	0	4	2	10	0	0	10	5	1	1	2	1	3	16	1	2	3	0	1	0	0	0	0	0	0	0	0	0
1	2	1	3	6	1	2	2	4	0	0	6	0	0	0	0	0	0	0	0	0	0	0	0	0		2			0	2	2	0	1	3	1
3	2	1	4	7	1	2	2	1	0	0	0	0	0	0	0	0	0	0	0	0	0	0	0	0		2			0	2	4	0	1	3	1
1	2	1	5	7	1	2	2	1	0	2	0	0	1	0	3	0	0	0	0	0	0	0	0	0		2			0	2	42	1	1	2	0	1	0	0	0	0	0	0	0	0	0
1	2	2	6	5	3	2	2	1	4	4	4	0	3	0	0	10	0	0	2	1	0	0	0	0		2			0	2	4	0	2	3	1
1	2	2	6	7	1	2	2	1	3	2	20	1	0	0	0	0	0	0	1	0	0	0	0	0		2			0	2	3	0	2	3	1
1	1	1	4	7	1	1	3	1	4	50	0	0	0	0	0	0	0	0	1	1	0	0	0	0		2			0	2	45	1	1	2	0	1	0	0	0	0	0	0	0	0	0
1	2	1	3	7	1	2	1	1	0	0	0	0	0	0	0	0	0	0	1	1	0	0	0	0		2			0	2	12	0	1	3	1
1	2	1	2	6	1	2	2	4	0	0	0	0	0	0	0	0	0	0	0	0	0	0	0	0		2			0	2	2	0	1	3	1
1	2	1	3	7	1	1	3	1	0	0	8	0	0	0	0	0	0	0	1	2	0	0	0	0		2			1	2	6	0	1	3	1
1	2	1	3	7	1	1	2	1	0	0	0	0	0	0	0	0	0	0	0	0	0	0	0	0		2			1	2	2	0	1	3	1
1	2	1	2	7	1	2	2	1	0	0	0	0	0	0	0	0	0	0	0	0	1	1	0	0	3	1	1	2	0	3	9	0	1	3	1
1	2	1	4	7	2	4	2	1	0	8	2	0	0	0	0	0	0	0	0	2	1	1	0	0	5	1	2	2	0	2	48	1	1	2	0	1	0	0	0	0	0	0	0	0	0
1	2	2	4	7	1	2	2	1	0	0	0	0	0	0	0	0	0	0	0	1	0	0	0	0		1	2	2	0	2	25	1	2	2	0	1	0	0	1	0	0	0	0	0	0
1	1	1	3	7	1	2	2	1	0	0	0	0	0	0	0	0	0	0	0	0	4	4	0	0	5	1	2	2	0	2	14	0	1	3	1
1	2	1	5	2	3	2	2	1	1	20	4	0	0	0	0	20	0	0	5	5	15	5	0	10	5	1	2	2	0	2	6	0	1	3	1
1	2	1	3	2	1	2	2	1	0	13	1	0	1	0	0	0	0	0	1	0	0	0	0	0		1	3	2	0	2	4	0	1	3	1
1	2	1	4	7	3	2	2	5	0	0	8	0	0	0	3	0	0	0	1	0	0	0	0	0		2			0	2	19	1	1	3	0	1	0	0	0	0	0	0	0	0	0
1	2	1	4	5	3	2	2	1	0	0	0	0	0	0	0	0	0	0	0	0	0	0	0	0		1	1	2	1	2	44	1	1	1	0	1	0	0	0	0	0	0	0	0	0
1	2	1	3	7	2	4	1	1	0	3	0	0	0	0	0	0	0	0	4	0	13	13	0	0	3	1	1	3	0	2	8	0	1	3	1
1	2	2	4	5	3	2	2	1	0	6	1	0	1	0	0	0	0	0	0	0	3	0	0	3	5	1	1	2	0	2	40	0	1	3	0	0
1	2	1	3	7	1	2	1	1	0	0	0	0	1	0	0	0	0	0	0	0	0	0	0	0		2			1	2	56	1	1	1	0	1	0	0	0	0	0	0	0	0	0
1	2	1	3	7	1	2	2	1	0	6	0	0	0	0	0	0	0	0	0	0	0	0	0	0		2			1	2	50	1	1	1	0	1	0	0	0	0	0	0	0	0	0
1	2	1	3	7	1	4	1	4	0	9	0	0	0	0	0	0	0	0	0	1	3	3	0	0	3	1	1	2	0	2	1		1	3	1
1	1	1	4	6	1	4	1	1	0	50	0	0	0	0	0	0	0	0	2	1	0	0	0	0		2			1	2	5	0	1	3	1
1	2	1	3	5	2	2	2	1	1	3	7	0	1	0	0	5	0	0	1	0	4	0	0	0		2			0	2	9	0	1	3	1
1	2	1	3	6	1	2	2	4	1	0	2	0	0	0	0	0	0	0	2	0	0	0	0	0		2			0	2	5	0	1	3	1
1	2	2	4	7	2	2	2	1	4	0	0	0	0	0	0	10	0	0	3	1	5	5	0	0	5	1	2	2	1	2	30	0	1	3	0	0
1	2	1	2	6	1	4	1	1	0	0	0	0	0	0	0	0	0	0	0	0	0	0	0	0		2			0	2	10	0	1	3	1
1	2	1	4	7	1	2	2	1	0	2	2	0	0	0	0	0	0	0	2	1	0	0	0	0		2			0	2	18	1	1	3	0	1	0	0	0	0	0	0	0	0	0
1	2	1	4	7	1	2	2	1	4	5	0	0	0	0	0	1	0	0	1	1	1	1	0	0	5	1	1	3	0	2	6	0	1	3	1
1	2	1	2	4	2	4	1	1	0	8	3	0	1	0	0	8	0	0	4	4	2	2	0	0	5	1	2	2	1	2	58	1	1	1	0	1	0	0	0	0	0	0	0	0	0
1	2	1	2	6	1	4	1	1	0	0	0	0	0	0	0	0	0	0	1	0	0	0	0	0		2			1	2	14	0	1	3	1
1	2	1	4	7	1	2	2	1	0	0	0	0	0	0	0	0	0	0	1	0	4	4	0	0	3	1	1	3	0	2	11	0	1	3	1
1	2	1	3	7	1	2	2	1	0	0	6	0	0	0	0	0	0	0	1	0	0	0	0	0		2			0	2	5	0	1	3	1
1	1	1	5	7	1	1	3	1	0	0	0	0	0	0	0	0	0	0	1	0	0	0	0	0		2			0	2	6	0	1	3	1
1	1	1	5	7	1	1	3	1	0	0	0	0	0	0	0	0	0	0	1	0	0	0	0	0		2			1	2	1	0	1	3	1
1	2	2	4	7	1	1	3	1	0	0	0	0	0	0	0	0	0	0	1	0	0	0	0	0		2			0	2	7	0	2	3	1
1	2	1	3	7	3	2	2	1	0	4	3	0	0	0	0	0	0	0	0	0	0	0	0	0		2			0	2	10	0	1	3	1
1	2	1	2	6	1	4	1	4	0	5	6	0	0	0	0	2	1	0	0	0	0	0	0	0		2			1	2	3	0	1	3	1
1	2	1	3	7	1	2	2	4	0	1	4	0	2	0	0	5	0	0	2	0	0	0	0	0		2			0	2	0		1	3	1
1	2	1	2	6	3	4	1	5	0	3	0	0	0	0	0	0	0	0	10	1	0	0	0	0		2			0	3	11	0	1	3	1
1	2	1	3	7	1	1	3	1	0	0	8	0	0	0	0	0	0	0	1	2	0	0	0	0		2			0	2	26	1	1	2	0	1	0	0	1	0	0	0	0	0	0
1	1	1	4	7	1	2	2	1	0	3	2	0	0	0	0	0	0	0	1	1	1	1	0	0	5	1	1	2	0	3	16	0	1	3	0	0
1	1	1	3	7	3	2	2	1	20	2	1	0	0	0	0	0	0	0	4	0	0	0	0	0		2			1	2	9	0	1	3	1
1	2	1	4	3	1	2	2	1	9	20	2	3	2	2	5	20	0	0	2	0	0	0	0	0		2			1	2	41	1	1	1	0	1	0	0	0	0	0	0	0	0	0
1	2	1	3	7	1	2	2	4	0	1	4	0	2	0	0	5	0	0	2	0	0	0	0	0		2			0	2	4	0	1	7	1
1	2	1	4	7	1	1	3	1	0	5	0	0	0	0	0	0	0	0	0	0	0	0	0	0		2			0	2	31	1	1	2	0	1	0	0	0	0	0	0	0	0	0
1	2	1	3	4	3	4	1	5	0	9	6	0	3	0	0	4	0	0	1	1	5	0	0	5	3	1	2	3	0	2	12	0	1	3	1
1	1	1	5	7	1	2	2	1	1	0	5	0	0	0	0	30	0	0	1	1	0	0	0	0		2			0	2	15	0	1	3	0	0
1	2	1	4	7	3	2	2	1	0	0	0	0	0	0	0	0	0	0	0	0	1	1	0	0	3	1	1	2	0	2	5	0	1	3	1
1	1	1	3	7	2	2	2	1	0	5	0	0	0	0	0	0	0	0	2	0	1	1	0	0	5	1	2	3	0	2	6	0	1	3	1
1	2	1	2	7	3	2	2	1	0	0	0	0	0	0	0	0	0	0	1	2	0	0	0	0		2			0	2	37	1	1	2	0	1	0	0	0	0	0	0	0	0	0
1	1	1	2	3	1	1	3	1	0	0	2	0	0	0	0	0	0	0	2	2	2	2	0	0	5	1	1	2	0	2	7	0	1	3	1
1	2	1	4	2	1	2	2	4	7	5	5	3	6	3	0	6	0	0	3	3	1	0	0	1	6	1	2	3	0	2	11	0	1	3	1
1	3	2	4	7	1	2	2	1	1	0	0	0	0	0	0	0	0	0	1	0	0	0	0	0		2			0	2	6	0	1	8	1
1	2	1	3	7	2	2	2	4	0	7	0	0	0	0	0	10	0	0	0	0	10	0	0	10	5	1	2	2	1	2	29	1	1	8	0	1	0	0	0	0	0	0	0	0	0
1	2	1	4	7	3	2	2	1	0	7	0	0	0	0	3	0	0	0	1	1	1	1	0	0	3	1	2	2	0	2	6	0	1	3	1
1	2	1	5	7	1	2	2	1	0	8	2	0	2	0	0	0	0	0	10	1	0	0	0	0		1	1	2	0	2	19	1	1	3	0	1	0	0	0	0	0	0	0	0	0
1	2	1	3	6	1	2	2	5	3	17	11	0	1	0	0	0	2	0	3	0	20	10	0	10	5	1	2	2	1	2	10	0	1	3	1
1	1	1	5	3	1	4	1	1	0	5	0	0	0	0	0	0	0	0	1	1	0	0	0	0		2			0	2	22	1	1	3	0	1	0	0	0	0	0	0	0	0	0
1	2	1	4	7	1	2	2	1	0	0	15	0	0	0	0	0	0	0	2	1	1	1	0	0	3	1	1	2	1	2	43	1	1	1	0	1	0	0	0	0	0	0	1	0	0
1	2	2	3	3	3	2	2	1	0	6	0	0	0	0	0	0	0	0	0	1	0	0	0	0		2			0	2	19	1	2	2	0	1	0	0	0	0	0	0	0	0	0
1	2	2	5	7	2	2	2	1	0	0	1	0	2	0	0	0	0	0	2	0	0	0	0	0		1	1	6	1	2	43	1	1	1	0	1	0	0	1	0	0	0	0	0	0
1	1	1	6	7	3	2	2	1	0	18	0	0	0	0	0	0	0	0	3	0	0	0	0	0		2			1	2	20	1	1	3	0	1	0	0	0	0	0	0	0	0	0
1	1	1	3	5	3	1	3	1	12	60	4	0	4	0	0	0	0	0	4	1	8	8	0	0	3	1	1	3	0	2	3	0	1	3	1
1	2	1	3	6	1	1	2	1	0	0	1	0	0	0	0	0	0	0	1	0	0	0	0	0		2			0	2	13	0	1	3	1
1	2	1	1	7	1	4	1	1	0	1	0	0	0	0	0	0	0	0	1	0	1	0	0	1		2			1	2	37	1	1	1	0	1	0	0	0	0	0	0	0	0	0
1	2	1	4	7	3	2	2	1	10	20	0	0	0	0	0	0	0	0	0	0	2	2	0	0	5	1	1	3	0	2	11	0	1	3	1
1	2	1	3	7	1	1	3	1	0	0	3	0	0	0	0	0	0	0	0	0	0	0	0	0		2			0	2	38	0	1	2	0	0
1	2	1	4	7	1	2	2	1	0	16	14	0	0	0	0	0	0	0	1	2	14	12	2	0	4	1	1	2	0	2	9	0	1	3	1
1	1	1	3	7	1	1	3	1	0	1	0	0	0	0	0	0	0	0	2	0	0	0	0	0		2			1	2	54	1	1	1	0	1	0	0	0	0	0	0	0	0	0
1	2	1	3	7	1	2	2	1	0	0	0	0	2	0	0	0	0	0	2	0	1	1	0	0	5	1	2	2	1	2	28	0	1	3	0	0
1	2	2	4	7	1	1	3	1	0	0	0	0	0	0	0	0	0	0	0	0	0	0	0	0		2			0	2	6	0	1	3	1
1	1	1	3	7	1	1	3	1	0	5	30	0	0	0	0	0	0	0	3	2	9	9	0	0	5	1	1	2	0	2	40	1	1	3	0	1	0	0	0	0	1	0	0	0	0
1	2	2	5	7	2	2	2	1	0	25	0	0	2	0	0	30	0	0	2	0	3	0	0	0		2			0	2	34	1	1	2	0	1	0	0	0	0	0	0	0	0	0
1	2	1	4	7	3	2	2	1	5	2	2	0	1	0	6	20	0	0	1	2	2	1	0	1	5	1	2	2	1	2	87	1	1	4	0	1	0	0	0	0	0	0	0	0	0
1	2	1	4	7	3	2	2	1	0	1	0	0	0	0	0	0	0	0	1	1	0	0	0	0		2			1	2	16	1	1	8	0	1	0	0	0	0	0	0	0	0	0
1	2	1	3	7	1	4	1	4	0	8	0	0	0	0	0	0	0	0	1	0	0	0	0	0		2			0	2	37	1	1	2	0	1	0	0	0	0	0	0	0	0	0
1	2	1	4	6	1	2	2	1	0	15	0	0	0	0	0	0	0	0	5	0	2	2	0	0	5	1	1	2	1	2	11	0	1	3	1
1	1	1	4	7	1	2	1	1	17	0	0	0	0	0	0	0	0	0	2	2	0	0	0	0		1	2	3	0	2	8	0	1	3	1
1	2	1	4	7	2	1	3	1	0	0	0	0	0	0	0	0	0	0	0	0	0	0	0	0		1	1	2	0	2	0		1	3	1
1	2	1	3	7	1	2	2	1	0	0	0	0	1	0	1	1	0	0	3	1	1	0	0	1		2			1	2	18	1	1	3	0	1	0	0	0	0	0	0	0	0	0
1	1	2	7	7	1	1	3	1	0	0	11	0	0	0	0	0	0	0	1	0	1	0	1	0		2			0	2	32	1	2	2	0	1	0	1	0	0	0	0	0	0	1	3276	32	1	0
3	4	1	2	7	1	4	3	4	0	1	0	0	0	0	0	0	0	0	1	0	0	0	0	0		1	2	3	0	2	18	1	1	3	0	1	0	0	0	0	0	0	0	0	0
1	2	2	4	7	1	2	2	1	0	0	0	0	0	0	0	0	0	0	0	0	3	3	0	0	3	1	2	2	0	2	3	0	3	3	1
1	2	1	3	7	1	4	2	1	0	0	0	0	0	0	0	0	0	0	0	0	0	0	0	0		2			1	2	0		1	3	1
1	2	1	3	7	2	4	1	1	5	15	3	2	1	0	0	18	0	0	2	0	21	2	0	19	2	1	1	2	0	2	30	1	1	2	0	1	0	0	0	0	0	0	0	0	0
1	2	1	3	7	2	2	2	4	0	0	2	0	0	0	0	0	0	0	0	0	0	0	0	0		1	1	3	0	2	18	1	1	2	0	1	0	0	0	0	0	0	0	0	0
1	2	1	1	6	1	4	1	4	0	0	0	0	0	0	0	0	0	0	2	1	0	0	0	0		2			0	3	12	0	1	3	1
1	2	2	3	7	1	2	2	1	2	6	4	0	1	0	5	7	0	0	2	4	0	0	0	0		2			0	2	27	1	1	3	0	1	0	0	0	0	0	0	0	0	0
1	1	1	3	5	2	2	2	1	0	2	1	0	0	0	0	0	0	0	2	0	6	6	0	0	5	1	1	3	0	2	7	0	1	3	1
1	2	2	4	7	1	2	1	1	0	15	2	0	0	0	0	0	0	0	2	0	0	0	0	0		2			0	2	3	0	2	3	1
1	1	1	4	7	1	2	2	1	0	0	0	0	0	0	0	0	0	0	0	0	0	0	0	0		1	2	3	1	2	33	0	1	1	0	0
1	2	1	2	3	1	2	2	1	0	0	0	0	0	0	0	0	0	0	0	0	0	0	0	0		2			0	7	103	1	1	2	0	1	0	0	0	0	0	0	0	0	0
1	2	1	4	6	1	1	3	1	0	0	0	0	2	1	8	0	0	0	1	0	0	0	0	0		1	2	3	0	2	15	1	1	3	0	1	0	0	0	0	0	0	0	0	0
1	2	1	3	7	1	2	2	1	0	0	0	0	0	0	0	0	0	0	0	0	0	0	0	0		2			0	2	20	1	1	2	0	1	0	0	0	0	0	0	0	0	0
1	2	2	4	4	3	2	2	1	0	10	3	1	10	0	4	300	0	0	4	1	20	0	0	20	5	1	1	2	1	2	23	1	2	1	0	1	0	0	0	0	0	0	0	0	0
2	2	1	3	7	1	1	3	1	0	2	0	0	0	0	0	0	0	0	0	0	0	0	0	0		2			0	2	1	0	1	3	1
1	2	1	3	7	1	2	2	5	0	9	2	0	0	0	0	0	0	0	0	0	1	0	1	0		2			0	2	7	0	1	3	1
1	2	1	3	7	1	2	2	1	0	10	0	0	0	0	0	0	0	0	0	0	0	0	0	0		2			0	2	2	0	1	3	1
1	2	1	3	7	1	4	1	4	0	0	4	0	0	0	0	0	0	0	0	0	1	0	0	1		2			0	3	4	0	1	3	1
1	2	1	4	7	1	2	2	1	4	6	0	0	1	0	0	0	0	0	2	1	6	6	0	0	4	1	2	2	0	2	31	1	1	3	0	1	0	0	0	0	0	0	0	0	1		31	6
1	2	1	3	6	1	2	2	4	0	0	7	0	0	0	0	0	0	0	0	0	2	2	0	0	3	1	1	3	0	2	38	1	1	2	0	1	0	0	0	0	0	0	0	0	0
1	2	1	6	7	1	2	2	1	2	5	5	0	0	0	0	0	0	0	0	2	4	4	0	0	5	1	1	2	1	2	9	0	1	8	1
1	1	2	4	7	3	2	2	1	0	0	0	0	0	0	0	0	0	0	0	0	6	6	0	0	3	1	1	3	1	2	42	1	2	1	0	1	0	0	0	0	0	0	0	0	0
1	2	1	2	6	1	4	1	4	0	2	0	0	0	0	0	0	0	0	0	0	0	0	0	0		2			0	2	8	0	1	3	1
1	1	1	4	7	1	1	2	1	0	0	6	0	0	0	0	0	0	0	1	0	0	0	0	0		2			0	2	40	1	1	2	0	1	0	0	1	0	0	0	0	0	0
1	2	1	2	5	3	4	1	5	0	5	0	0	0	0	0	0	0	0	0	0	2	2	0	0	5	1	1	2	0	2	7	0	1	3	1
1	2	1	3	7	2	2	2	4	2	3	2	0	1	0	0	5	0	0	0	0	1	0	0	0		2			0	2	4	0	1	3	1
1	2	1	2	5	3	4	1	1	0	0	2	0	0	0	0	0	0	0	0	0	0	0	0	0		2			0	2	41	1	1	2	0	1	0	0	0	0	0	0	0	0	0
2	2	1	4	7	2	2	2	1	0	3	0	0	0	0	0	0	0	0	0	0	0	0	0	0		1	2	2	0	2	4	0	1	3	1
1	2	1	3	7	1	1	3	1	0	0	0	0	0	0	0	0	0	0	1	0	15	15	0	0	5	1	1	2	0	2	1	0	1	3	1
1	2	2	3	3	3	2	2	1	0	6	0	0	0	0	0	0	0	0	0	1	0	0	0	0		2			0	2	2	0	2	3	1
1	2	1	4	7	1	2	2	1	7	4	0	0	0	0	0	0	0	0	2	1	1	0	1	0		2			1	2	42	1	1	1	0	1	0	0	0	0	0	0	0	0	0
1	2	1	1	5	3	4	1	5	1	0	1	0	0	0	0	1	0	0	1	0	3	3	0	0	5	1	1	2	1	2	36	1	1	1	0	1	0	0	0	0	0	0	0	0	0
1	2	1	2	2	1	4	1	1	0	0	0	0	0	0	0	0	0	0	2	1	0	0	0	0		2			0	2	27	1	1	2	0	1	0	0	0	0	0	0	0	0	0
1	2	1	5	7	1	2	2	1	0	0	0	0	0	0	0	0	0	0	0	0	3	3	0	0	5	1	1	2	0	2	30	1	1	2	0	1	0	0	0	0	0	0	0	0	0
1	2	1	4	6	1	4	1	1	80	12	6	0	0	0	0	0	0	0	1	1	2	2	0	0	3	1	1	2	0	2	30	1	1	2	0	1	0	0	0	0	0	0	0	0	0
1	2	1	4	7	1	2	2	1	2	40	0	0	0	0	0	0	0	0	2	0	0	0	0	0		2			0	2	16	1	1	2	0	1	0	0	0	0	0	0	0	0	0
1	2	1	2	6	1	4	1	1	0	0	2	0	0	0	0	0	0	0	2	0	3	3	0	0	3	1	2	3	0	2	2	0	1	3	1
1	2	1	3	6	1	1	3	4	0	0	20	0	0	0	0	0	0	0	1	0	0	0	0	0		1	1	2	0	2	32	1	1	2	0	1	0	0	0	0	0	0	0	0	0
1	1	2	4	6	1	2	2	1	0	0	0	0	0	0	0	0	0	0	1	0	0	0	0	0		2			0	3	6	0	1	3	1
1	2	1	3	2	1	2	2	1	0	0	0	0	0	0	0	0	0	0	2	0	0	0	0	0		2			0	2	4	0	1	3	1
3	2	1	4	7	3	2	1	1	0	0	0	0	0	0	0	0	0	0	0	0	7	0	0	0		2			1	2	10	0	1	3	1
1	1	1	4	7	1	2	2	1	3	7	2	0	0	0	0	10	0	0	1	0	8	0	0	8		2			1	2	13	0	1	3	1
1	2	1	3	5	3	4	1	1	0	0	15	0	2	0	0	0	4	0	0	0	0	0	0	0		2			1	2	12	0	1	3	1
1	2	2	4	7	1	2	2	1	11	10	0	0	0	0	0	0	0	0	0	1	0	0	0	0		1	1	2	0	2	7	0	1	3	1
1	2	1	4	3	1	4	2	1	0	0	0	0	0	0	0	0	7	0	0	0	0	0	0	0		2			1	2	17	1	1	3	0	1	0	0	0	0	0	0	0	0	0
1	2	1	2	7	1	2	2	1	0	4	3	0	0	0	0	0	0	0	1	1	1	1	0	0	5	1	1	6	0	2	30	1	1	2	0	1	0	0	0	0	0	0	0	0	0
1	2	2	4	7	1	4	2	1	0	0	0	0	0	0	0	0	0	0	0	0	0	0	0	0		2			0	2	17	1	1	3	0	1	0	0	0	0	0	0	0	0	0
1	2	1	5	7	1	1	3	1	0	7	3	0	0	0	0	0	0	1	1	1	0	0	0	0		1	2	3	0	2	24	1	1	3	0	1	0	0	1	0	1	0	1	0	1	334	25	1	0
1	2	1	3	6	1	4	2	4	6	2	9	0	0	0	0	0	0	0	0	0	1	1	0	0	5	1	1	5	1	2	24	0	1	1	0	0
1	2	1	4	7	1	4	2	1	4	0	7	0	0	0	0	0	0	0	2	0	0	0	0	0		2			0	2	45	1	1	2	0	1	0	0	0	0	0	0	0	0	0
1	2	1	3	2	2	4	1	5	0	4	0	0	3	0	2	5	0	0	1	0	0	0	0	0		2			0	2	3	0	1	3	1
1	2	1	4	5	3	2	2	1	0	0	0	0	0	0	0	0	0	0	0	0	0	0	0	0		2			0	2	4	0	1	3	1
1	2	1	3	7	2	2	2	1	0	0	0	0	0	0	0	0	0	0	0	0	0	0	0	0		2			1	2	8	0	1	3	1
1	2	1	2	6	1	4	2	1	0	0	0	0	0	0	0	0	0	0	0	1	2	2	0	0	5	1	2	2	0	2	5	0	1	3	1
1	2	1	3	7	1	2	2	1	0	0	1	0	2	0	0	0	0	0	1	1	0	0	0	0		1	1	2	0	2	1	0	1	3	1
1	2	1	3	6	1	2	2	1	0	0	0	0	0	0	0	0	0	0	0	0	0	0	0	0		2			0	2	25	1	1	2	0	1	0	0	0	0	0	0	0	0	0
1	2	1	5	7	1	2	2	4	0	7	17	0	0	0	0	0	0	0	2	0	13	13	0	0	5	1	2	2	1	2	27	1	1	3	0	1	0	0	0	0	0	0	0	0	0
1	2	1	3	7	2	2	2	1	5	1	6	0	1	0	0	5	0	0	5	1	7	7	0	0	5	1	2	2	1	2	19	1	1	3	0	1	0	0	0	0	0	0	0	0	0
1	2	2	5	4	2	2	2	1	0	10	0	0	1	0	0	50	0	0	2	1	3	3	0	0	5	1	1	2	0	3	1	0	3	3	1
1	3	1	3	7	1	2	2	1	0	40	5	0	0	0	0	0	0	0	1	1	3	3	0	0	3	1	1	2	1	2	7	0	1	3	1
1	2	1	4	7	1	4	1	1	0	0	9	0	0	0	0	0	0	0	1	0	0	0	0	0		2			1	2	2	0	1	3	1
1	2	1	3	7	1	2	2	1	0	0	0	0	0	0	0	0	0	0	0	0	0	0	0	0		2			1	2	4	0	1	3	1
1	1	1	5	7	1	1	3	1	0	0	4	0	0	0	0	0	0	0	0	0	2	0	0	2	5	1	2	2	1	2	40	1	1	3	0	1	0	0	0	0	0	0	0	0	0
3	2	1	4	3	1	2	2	1	0	0	0	0	0	0	0	0	0	0	0	0	0	0	0	0		1	1	2	0	2	20	1	1	2	0	1	0	0	0	0	0	0	0	0	0
1	2	1	3	2	1	2	2	1	0	2	0	0	0	0	0	0	0	0	0	0	0	0	0	0		2			1	2	30	1	1	1	0	1	0	0	0	0	0	0	0	0	0
1	2	1	3	5	3	2	2	1	0	20	11	0	1	0	0	0	0	0	1	0	2	2	0	0	5	1	1	2	0	2	1	0	1	3	1
1	2	1	2	6	1	2	2	4	0	8	0	0	0	0	0	0	0	0	0	1	4	4	0	0	6	1	1	2	0	2	6	0	1	3	1
3	2	1	2	7	2	2	2	1	0	0	0	0	0	0	0	0	0	0	0	0	0	0	0	0		2			0	2	0		1	3	1
1	2	1	4	5	3	4	1	4	2	19	5	0	0	0	0	0	0	0	2	0	0	0	0	0		2			0	2	38	1	1	2	0	1	0	0	0	0	0	0	0	0	0
1	2	1	4	7	2	2	2	1	0	10	0	0	0	0	0	0	0	0	1	1	0	0	0	0		2			1	2	22	1	1	3	0	1	0	0	0	0	0	0	0	0	0
1	2	2	6	7	1	2	1	1	0	14	0	0	0	0	0	0	0	0	0	1	0	0	0	0		2			1	3	4	0	2	3	1
1	2	1	3	7	2	4	1	1	0	1	0	0	0	0	0	0	0	0	0	0	3	0	0	3		2			1	3	0		1	3	1
1	2	1	3	6	1	1	3	4	0	0	20	0	0	0	0	0	0	0	1	0	0	0	0	0		1	1	2	0	2	12	0	1	3	1
1	2	1	6	7	1	2	2	1	0	0	0	0	0	0	0	0	0	0	0	0	2	2	0	0	5	1	1	4	1	2	27	1	1	3	0	1	0	0	0	0	0	0	0	0	0
1	2	1	2	6	3	2	2	1	0	5	4	0	0	0	0	0	0	0	0	0	0	0	0	0		2			0	2	2	0	1	3	1
1	2	2	3	5	3	2	2	1	11	10	9	3	3	1	3	7	0	0	3	1	2	0	2	0		2			0	2	1	0	2	3	1
1	2	2	4	7	1	2	2	1	0	0	0	0	0	0	0	0	0	0	0	0	0	0	0	0		2			0	2	22	1	2	2	0	1	0	0	0	0	0	0	0	0	0
1	2	1	2	6	1	4	1	1	0	0	0	0	0	0	0	0	0	0	0	0	0	0	0	0		2			0	2	26	1	1	2	0	1	0	0	0	0	0	0	0	0	0
1	1	1	5	7	1	1	3	1	2	6	20	0	0	0	0	0	0	0	3	1	2	2	0	0	5	1	1	1	1	2	14	0	1	8	1
1	2	2	5	2	1	2	2	1	0	4	3	0	0	0	0	0	0	0	2	2	5	5	0	0	5	1	1	3	0	2	46	1	1	2	0	1	0	0	0	0	0	0	0	0	0
1	2	1	3	7	1	1	3	4	0	0	0	0	0	0	0	0	0	0	0	0	0	0	0	0		2			0	2	35	1	1	2	0	1	0	0	0	0	0	0	0	0	0
1	2	2	3	7	3	2	2	1	3	0	0	0	6	0	3	20	0	0	2	0	2	0	0	0		2			1	2	18	0	2	3	0	0
1	2	1	3	7	2	2	2	1	2	0	15	0	2	0	2	10	0	0	5	0	15	0	0	0		2			1	2	18	0	1	3	0	0
1	1	2	3	6	1	4	1	1	0	3	13	0	0	0	0	0	0	0	2	1	2	2	0	0	3	1	1	3	0	U	9	0	3	3	1
1	1	1	3	7	1	4	1	1	0	24	0	2	1	2	12	20	40	0	2	0	4	4	0	0	5	1	1	3	0	2	62	0	1	2	0	0
1	2	2	4	7	1	2	2	1	1	2	5	0	0	0	7	13	0	0	4	1	1	1	0	0	3	1	2	3	0	2	7	0	1	3	1
1	2	1	2	7	1	4	1	1	0	0	0	0	0	0	0	0	0	0	0	0	0	0	0	0		2			0	2	1	0	1	3	1
1	2	1	3	7	1	4	1	1	0	0	0	0	0	0	0	0	0	0	0	0	1	1	0	0	3	1	1	3	1	2	63	1	1	1	0	1	0	0	0	0	0	0	0	0	0
1	2	1	3	7	1	2	2	1	0	2	0	0	0	0	0	0	0	0	0	0	2	2	0	0	3	1	2	2	1	2	15	0	1	3	0	0
1	1	2	5	6	1	1	3	1	3	1	0	0	0	0	0	0	0	0	0	0	2	2	0	0	5	1	1	2	0	2	16	1	2	2	0	1	0	0	0	0	0	0	0	0	0
1	2	1	3	7	2	4	1	1	0	2	7	0	0	0	0	0	0	0	1	0	4	0	4	0		2			1	2	39	0	1	1	0	0
1	2	1	4	7	2	2	2	1	0	2	4	0	0	0	0	0	0	0	3	2	2	0	0	2	5	1	2	2	1	2	17	1	1	3	0	1	0	0	0	0	0	0	0	0	0
1	2	1	6	7	1	4	1	1	0	8	5	0	0	0	0	43	0	0	4	2	0	0	0	0		2			0	2	21	1	1	3	0	1	0	0	0	0	0	0	0	0	0
1	2	1	4	7	1	2	2	1	0	0	0	0	0	0	0	0	0	0	0	0	0	0	0	0		2			0	2	0		1	3	1
1	2	1	3	7	1	2	2	1	0	3	4	0	1	0	1	2	0	0	0	0	0	0	0	0		2			1	2	21	1	1	8	0	1	0	0	0	0	0	0	0	0	0
1	1	2	5	7	1	1	3	1	0	0	0	0	0	0	0	0	0	0	1	1	0	0	0	0		2			0	2	4	0	1	8	1
1	2	1	4	5	3	4	1	5	0	4	2	0	0	0	0	0	0	0	0	0	1	0	1	0	3	1	1	2	1	2	1	0	1	3	1
1	2	1	3	7	3	2	2	1	0	0	0	0	2	0	0	20	3	0	1	1	2	2	0	0	3	1	1	2	1	3	13	0	1	3	1
1	2	1	2	7	1	2	2	1	0	0	0	0	0	0	0	0	0	0	2	0	0	0	0	0		2			1	2	29	0	1	1	0	0
1	2	1	3	2	1	2	2	4	0	4	0	0	1	0	0	0	0	0	2	0	0	0	0	0		2			1	2	13	0	1	3	1
1	1	1	3	7	3	1	3	1	1	0	0	0	0	0	0	0	0	0	2	1	2	2	0	0	5	1	1	2	1	2	10	0	1	3	1
1	2	1	3	3	2	4	1	1	0	0	0	0	0	0	0	0	0	0	0	0	0	0	0	0		2			1	3	4	0	1	3	1
1	2	1	3	7	1	2	2	1	0	7	1	0	0	0	0	0	0	0	0	1	0	0	0	0		2			0	2	13	0	1	3	1
1	2	1	3	6	1	4	1	5	0	5	4	0	0	0	0	0	0	0	1	0	0	0	0	0		2			0	U	7	0	1	3	1
1	2	1	3	7	1	2	2	1	0	5	6	0	0	0	0	0	0	0	3	1	3	3	0	0	3	1	2	2	1	2	12	0	2	3	1
1	2	2	3	7	1	4	3	1	0	0	0	0	0	0	0	0	0	0	0	0	1	0	1	0		2			0	2	1	0	2	3	1
1	2	1	3	7	1	2	2	1	0	5	6	0	0	0	0	0	0	0	3	1	3	3	0	0	3	1	2	2	1	2	40	1	2	1	0	1	0	0	0	0	0	0	0	0	0
1	2	1	3	7	1	2	2	4	0	12	4	0	0	0	0	0	0	0	0	0	1	1	0	0	6	1	1	2	0	2	23	1	1	2	0	1	0	0	0	0	0	0	0	0	0
1	2	2	1	5	3	2	2	1	1	10	0	0	2	0	0	0	0	0	2	0	2	2	0	0	3	1	2	2	0	2	29	1	2	3	0	1	0	0	0	0	0	0	0	0	0
1	1	1	4	7	1	4	1	1	0	0	0	0	0	0	0	0	0	0	0	0	0	0	0	0		1	2	3	1	2	8	0	1	3	1
1	2	1	4	5	2	2	2	1	0	20	0	0	1	0	3	0	0	0	3	0	3	0	0	0		2			1	2	14	0	1	3	1
1	1	1	3	7	2	2	2	1	0	0	5	0	0	0	0	0	0	0	0	1	3	3	0	0	3	1	1	2	0	2	11	0	1	3	1
1	2	1	3	7	3	2	2	1	0	0	9	0	0	0	0	0	0	0	2	1	0	0	0	0		2			0	3	0		1	8	1
1	2	2	4	6	1	2	1	1	0	0	0	0	0	0	0	0	0	0	0	0	0	0	0	0		2			0	2	6	0	2	3	1
1	2	1	4	7	2	2	2	1	0	30	7	0	1	0	1	23	0	0	1	1	4	4	0	0	6	1	1	2	0	2	35	1	1	2	0	1	0	0	0	0	0	0	0	0	0
1	1	2	5	7	1	1	1	1	0	0	0	0	0	0	0	0	0	0	0	0	0	0	0	0		2			0	2	2	0	1	3	1
1	2	1	3	7	2	2	2	1	5	7	3	0	0	0	0	9	0	0	1	1	0	0	0	0		2			0	2	5	0	1	3	1
1	1	1	4	6	1	1	3	1	0	0	0	0	0	0	0	0	0	0	0	0	0	0	0	0		2			0	2	3	0	1	3	1
1	2	2	6	7	1	2	2	1	0	10	4	0	1	0	2	0	0	0	3	1	0	0	0	0		2			0	2	7	0	2	3	1
1	2	2	6	7	1	2	2	1	0	10	4	0	1	0	2	0	0	0	3	1	0	0	0	0		2			0	2	3	0	2	3	1
1	2	1	4	7	1	1	3	1	0	0	0	0	0	0	0	0	0	0	0	0	0	0	0	0		2			0	2	6	0	1	3	1
1	1	2	4	7	1	2	2	1	0	8	0	0	0	0	0	0	0	0	3	6	1	1	0	0	3	1	1	3	1	2	6	0	2	3	1
1	2	1	4	7	1	2	2	1	0	0	0	0	0	0	0	0	0	0	1	0	1	1	0	0	3	1	1	2	0	2	3	0	1	3	1
1	2	2	4	7	1	1	3	1	0	4	0	0	0	0	0	0	0	0	0	1	0	0	0	0		2			1	2	10	0	2	3	1
1	1	1	4	2	1	2	2	1	0	0	0	0	0	0	0	0	0	0	1	0	0	0	0	0		2			0	2	31	1	1	2	0	1	0	0	0	0	0	0	0	0	0
1	2	1	2	6	1	4	1	4	0	0	0	0	0	0	0	0	0	0	1	0	0	0	0	0		2			1	2	2	0	1	3	1
1	2	1	2	7	2	2	2	1	0	0	0	0	0	0	0	0	0	0	1	2	7	7	0	0	5	1	1	2	0	2	8	0	1	3	1
1	2	1	3	7	2	2	2	4	0	0	0	0	0	0	0	0	0	0	0	2	0	0	0	0		2			1	2	7	0	1	3	1
1	2	2	4	7	1	2	1	1	0	8	13	0	0	0	0	0	0	0	0	0	1	0	1	0		2			1	2	4	0	2	3	1
1	2	1	5	6	1	2	1	1	0	9	7	1	1	0	6	0	0	0	2	1	5	4	0	1	3	1	1	2	1	2	9	0	1	3	1
1	2	1	1	6	1	4	1	4	0	0	0	0	0	0	0	0	0	0	2	1	0	0	0	0		2			0	2	32	1	1	2	0	1	0	0	0	0	0	0	0	0	0
1	2	1	5	5	3	2	2	4	8	11	1	0	4	0	0	0	0	0	3	0	3	1	0	2	3	1	2	2	1	2	7	0	1	3	1
1	2	2	4	3	1	2	2	1	0	0	0	0	0	0	0	0	0	0	0	0	1	0	1	0	5	1	1	2	0	2	34	1	2	2	0	1	0	1	0	1	0	0	0	0	1	1988	35	1	0
1	2	1	3	7	1	1	3	1	0	0	0	0	0	0	0	0	0	0	0	0	2	2	0	0	5	1	1	3	1	2	31	1	1	1	0	1	0	0	0	0	0	0	0	0	0
1	2	1	3	7	1	2	2	1	0	42	0	0	0	0	0	0	0	0	0	0	0	0	0	0		2			0	2	4	0	1	7	1
1	2	2	5	2	1	2	2	1	0	3	4	0	1	0	1	4	0	0	4	0	0	0	0	0		2			1	2	6	0	2	3	1
1	2	1	2	6	1	2	2	4	0	5	1	0	0	0	0	0	0	0	15	0	0	0	0	0		1	2	2	1	2	5	0	1	3	1
3	2	1	3	7	1	2	2	1	0	5	30	0	5	0	3	10	0	0	1	1	2	0	0	2		2			1	2	1	0	1	3	1
1	2	1	3	7	2	2	2	1	0	0	0	0	0	0	0	0	0	0	0	0	1	1	0	0	5	1	1	2	1	2	29	1	1	1	0	1	0	0	0	0	0	0	0	0	0
1	1	1	3	7	2	2	2	1	0	0	0	0	0	0	0	0	0	0	1	0	0	0	0	0		2			1	2	26	1	1	1	0	1	0	0	0	0	0	0	0	0	0
1	2	1	6	7	2	2	2	1	1	10	5	0	0	0	0	12	0	0	0	0	0	0	0	0		1	2	2	0	2	41	1	1	2	0	1	0	0	0	0	0	0	0	0	0
1	1	1	3	6	1	4	1	1	0	0	0	0	0	0	0	0	0	0	0	0	0	0	0	0		1	3	2	1	2	21	1	1	1	0	1	0	0	0	0	0	0	0	0	0
1	2	1	4	7	1	2	2	1	0	6	0	0	0	0	1	0	0	0	0	0	0	0	0	0		2			1	2	13	0	1	3	1
3	2	1	2	7	3	2	2	5	0	30	0	0	0	0	0	0	0	0	1	1	0	0	0	0		2			1	2	2	0	1	3	1
3	2	1	6	2	1	2	2	1	0	10	3	0	2	0	3	0	0	0	2	5	7	7	0	0	5	1	1	6	1	2	8	0	1	3	1
1	2	1	3	7	2	4	1	1	0	0	0	0	0	0	0	0	0	0	0	0	0	0	0	0		2			1	2	4	0	1	3	1
1	2	1	1	7	3	4	1	4	0	15	0	0	0	0	0	0	0	0	0	0	0	0	0	0		2			1	2	2	0	1	3	1
3	2	1	2	6	1	2	2	4	0	0	0	0	0	0	0	0	0	0	1	0	0	0	0	0		2			1	2	28	1	1	1	0	1	0	0	0	0	0	0	0	0	0
1	1	1	2	7	1	1	3	1	0	0	0	0	0	0	0	0	0	0	0	0	0	0	0	0		2			0	2	58	1	1	2	0	1	0	0	0	0	0	0	0	0	0
1	2	1	3	7	1	2	2	1	0	13	8	0	1	0	0	0	0	0	0	0	1	1	0	0	3	1	1	2	0	2	9	0	1	3	1
2	2	1	3	6	1	4	1	1	0	0	0	0	0	0	0	0	0	0	0	1	0	0	0	0		2			0	2	4	0	1	3	1
1	2	1	3	7	3	4	1	1	2	2	3	0	0	0	0	0	0	0	2	1	4	4	0	0	5	1	1	3	1	2	8	0	1	3	1
3	2	2	4	7	2	2	2	1	0	0	0	1	0	0	0	0	0	0	1	1	0	0	0	0		1	1	2	0	2	44	1	1	2	0	1	0	0	0	0	1	0	1	0	1	1457	44	1	1
1	1	1	4	6	1	4	1	4	0	0	0	0	2	0	0	0	0	0	1	1	6	6	0	0	3	1	3	3	0	2	37	1	1	2	0	1	0	0	0	0	0	0	0	0	0
1	2	1	3	4	3	2	2	4	5	10	0	0	0	0	2	25	0	0	3	0	10	0	0	10	5	1	1	3	0	2	6	0	1	3	1
1	2	1	4	7	2	2	2	4	0	12	0	0	0	0	0	0	0	0	0	1	4	4	0	0	5	1	2	3	0	2	3	0	1	3	1
1	2	1	4	7	2	2	2	4	0	12	0	0	0	0	0	0	0	0	0	1	4	4	0	0	5	1	2	3	0	2	3	0	1	3	1
1	1	1	2	7	2	2	2	1	0	2	3	0	0	0	0	0	0	0	0	0	0	0	0	0		2			1	2	1	0	1	3	1
1	1	1	5	7	1	1	3	1	0	6	2	0	0	0	0	0	0	0	1	0	0	0	0	0		2			0	2	7	0	1	3	1
1	2	1	3	5	2	1	3	1	0	9	4	0	0	0	0	0	0	0	1	0	2	2	0	0	3	1	1	3	1	2	2	0	1	3	1
1	2	2	3	7	1	2	2	1	0	5	4	0	0	0	0	0	0	0	1	0	2	0	0	2		2			1	2	1	0	2	3	1
1	2	1	3	5	3	4	1	1	0	0	14	0	0	0	0	0	0	0	0	1	0	0	0	0		2			0	2	30	1	1	2	0	1	0	0	0	0	0	0	0	0	0
1	2	1	3	6	1	1	1	1	0	0	5	0	0	0	0	0	0	0	1	0	2	2	0	0	5	1	1	3	1	2	7	0	1	3	1
1	2	1	3	7	2	2	2	1	5	8	0	0	2	0	1	2	0	0	1	0	1	0	0	0		2			1	3	7	0	1	3	1
1	2	1	2	7	1	4	1	1	0	0	0	0	0	0	0	0	0	0	0	0	0	0	0	0		2			0	2	5	0	1	3	1
1	2	1	6	7	2	2	2	1	0	40	6	0	0	0	7	7	0	0	1	0	2	0	2	0	3	1	3	3	1	2	20	0	1	3	0	0
1	2	1	3	7	1	4	1	1	0	0	0	0	0	0	0	0	0	0	1	1	0	0	0	0		2			1	2	17	1	1	3	0	1	0	0	0	0	0	0	0	0	0
1	2	1	2	7	1	2	2	1	0	10	0	0	0	0	0	0	0	0	2	0	0	0	0	0		2			1	2	37	0	1	1	0	0
1	2	1	4	6	1	2	2	1	0	0	0	0	0	0	0	0	0	0	0	0	0	0	0	0		2			0	2	12	0	1	3	1
1	2	1	3	7	1	4	1	1	0	4	0	3	0	0	0	0	0	0	2	1	9	9	0	0	5	1	2	2	1	3	0		1	3	1
1	2	1	3	7	1	2	2	4	0	6	4	0	0	0	0	0	0	0	0	3	2	2	0	0	6	1	1	3	0	2	4	0	1	3	1
1	2	1	3	7	1	2	2	5	0	0	0	10	4	0	0	0	0	0	5	5	2	2	0	0	5	1	2	2	0	2	22	1	1	3	0	1	0	0	0	0	0	0	0	0	0
1	1	1	4	7	1	2	2	1	0	9	0	0	0	0	0	0	0	0	0	0	0	0	0	0		2			0	2	4	0	1	3	1
1	2	1	4	7	1	1	3	1	0	0	0	0	0	0	0	0	0	0	0	0	0	0	0	0		2			0	2	54	1	1	8	0	1	0	0	0	0	0	0	0	0	0
1	2	1	4	7	3	2	2	1	0	5	2	0	0	0	1	6	5	0	2	2	10	0	1	9	3	1	2	2	1	2	26	0	1	1	0	0
1	1	1	4	7	1	1	3	1	1	0	1	0	0	0	0	0	0	0	0	0	0	0	0	0		2			0	2	57	1	1	2	0	1	0	0	0	0	0	0	0	0	0
1	2	2	7	7	1	1	1	1	0	7	0	0	0	0	0	0	0	0	1	0	0	0	0	0		2			1	2	52	1	2	1	0	1	0	0	0	0	0	0	0	0	0
1	1	1	4	7	1	2	2	1	0	5	0	0	0	0	0	0	0	0	0	0	0	0	0	0		2			1	2	2	0	1	3	1
1	2	2	4	7	1	2	2	1	0	10	5	0	0	0	0	0	4	0	2	0	0	0	0	0		2			1	2	26	0	1	1	0	0
1	1	1	5	7	1	1	3	1	0	0	0	0	0	0	0	0	0	0	0	0	0	0	0	0		2			0	2	5	0	1	3	1
1	1	1	4	7	1	1	3	1	1	0	1	0	0	0	0	0	0	0	0	0	0	0	0	0		2			1	2	22	1	1	3	0	1	0	0	0	0	0	0	0	0	0
1	2	1	4	6	1	4	1	1	0	20	5	5	2	0	6	4	0	0	5	1	1	0	1	0	3	1	3	5	0	2	20	1	1	3	0	1	0	0	0	0	0	0	0	0	0
1	2	1	3	7	1	1	3	1	0	20	0	0	0	0	0	0	0	0	0	0	0	0	0	0		2			1	2	39	1	1	1	0	1	0	0	0	0	0	0	0	0	0
1	2	1	3	7	1	1	3	5	0	0	0	0	0	0	0	0	0	0	0	0	0	0	0	0		2			1	2	51	0	1	7	0	0
1	2	1	4	7	1	2	2	1	0	30	14	0	0	0	0	0	0	0	1	0	3	3	0	0	6	1	2	2	0	2	56	1	1	3	0	1	0	0	0	0	0	0	0	0	0
1	2	1	3	6	1	4	2	4	6	2	9	0	0	0	0	0	0	0	0	0	1	1	0	0	5	1	1	5	1	2	5	0	1	3	1
1	2	1	3	7	1	4	1	1	0	2	0	0	0	0	0	0	0	0	0	0	0	0	0	0		1	3	2	1	2	8	0	1	3	1
1	2	1	3	6	1	2	2	1	0	7	6	0	0	0	0	0	0	0	1	1	0	0	0	0		2			1	2	46	1	1	1	0	1	0	0	0	0	0	0	0	0	0
1	2	2	4	7	1	2	2	1	11	10	0	0	0	0	0	0	0	0	0	1	0	0	0	0		1	1	2	1	U	0		2	3	1
1	2	2	5	7	1	1	3	1	0	0	0	0	0	0	0	0	0	0	0	0	3	3	0	0	6	1	1	2	0	2	29	1	1	3	0	1	0	0	0	0	0	0	0	0	0
1	2	1	3	7	2	4	1	1	0	6	0	0	0	0	0	7	0	0	1	0	2	0	0	2		2			0	2	5	0	1	3	1
1	2	1	3	7	3	2	2	1	0	4	4	0	0	0	0	0	0	0	4	0	0	0	0	0		2			1	2	7	0	1	3	1
1	2	1	3	7	1	2	2	1	0	3	1	0	0	0	0	0	0	0	1	0	4	4	0	0	6	1	1	2	1	2	7	0	1	3	1
1	1	1	3	7	2	2	2	1	0	0	0	0	0	0	0	0	0	0	0	0	0	0	0	0		2			0	2	45	1	1	2	0	1	0	0	0	0	0	0	0	0	0
1	2	1	6	7	2	2	2	1	0	10	10	0	1	0	0	0	0	0	2	0	0	0	0	0		2			1	2	12	0	1	3	1
1	2	1	2	7	2	1	1	5	0	0	0	0	0	0	0	0	0	0	0	1	3	0	0	3		2			1	2	17	1	1	3	0	1	0	0	0	0	0	0	0	0	0
1	2	1	3	2	1	2	2	1	0	8	0	0	0	0	0	0	0	0	0	0	0	0	0	0		2			0	2	28	1	1	2	0	1	0	0	0	0	0	0	0	0	0
1	2	1	3	7	1	2	2	1	0	0	0	0	0	0	0	0	0	0	0	0	0	0	0	0		2			1	2	12	0	1	3	1
1	2	1	3	4	3	4	1	4	4	8	5	2	0	0	0	10	8	0	1	0	2	0	0	2	5	1	2	2	1	2	0		1	3	1
1	2	1	4	5	2	4	1	5	0	6	0	0	1	0	0	10	0	0	4	0	2	0	0	0		2			1	2	47	0	1	5	0	0
1	1	1	8	7	1	1	3	1	0	0	0	0	0	0	0	0	0	0	0	0	0	0	0	0		2			1	2	53	1	1	1	0	1	0	0	0	0	0	0	0	0	0
1	2	1	7	7	1	2	2	1	0	11	2	0	1	0	4	0	0	0	4	0	0	0	0	0		2			0	2	51	1	1	2	0	1	0	0	0	0	0	0	0	0	0
1	2	1	3	5	3	4	1	1	0	0	0	0	0	0	0	0	0	0	1	0	0	0	0	0		2			0	2	4	0	1	3	1
1	2	2	7	7	1	2	2	1	0	15	3	0	0	0	0	0	0	0	0	0	10	10	0	0	5	1	1	3	0	2	37	1	2	2	0	1	0	0	0	0	0	0	0	0	0
1	2	2	4	7	1	2	2	4	0	10	6	0	0	0	0	0	0	0	0	2	1	0	1	0		2			1	2	51	1	1	1	0	1	0	0	0	0	0	0	0	0	0
1	2	2	3	7	1	2	2	1	0	8	29	2	1	0	4	0	0	0	2	0	0	0	0	0		2			1	2	21	1	2	1	0	1	0	0	0	0	0	0	0	0	0
1	2	1	4	7	1	2	2	1	0	0	0	0	0	0	0	0	0	0	3	0	0	0	0	0		1	2	3	1	2	13	0	1	3	1
1	2	1	4	7	1	1	1	1	0	6	0	0	0	0	0	0	0	0	0	0	0	0	0	0		2			1	2	35	1	1	9	0	1	0	0	0	0	0	0	0	0	0
1	2	1	2	7	1	2	2	1	0	0	0	0	0	0	0	0	0	0	0	0	0	0	0	0		2			0	2	28	1	1	2	0	1	0	0	0	0	0	0	0	0	0
1	2	1	4	3	2	1	3	5	1	8	3	0	0	0	0	0	0	0	0	2	0	0	0	0		2			1	2	20	1	1	3	0	1	0	0	0	0	0	0	0	0	0
1	2	1	3	7	1	1	3	1	0	0	0	0	0	0	0	0	0	0	0	0	0	0	0	0		1	1	3	0	2	39	1	1	2	0	1	0	0	0	0	0	0	0	0	0
1	2	2	4	7	3	2	2	1	30	4	0	0	0	0	0	0	0	0	2	0	0	0	0	0		2			1	2	29	1	2	1	0	1	0	0	0	0	0	0	0	0	0
1	2	1	4	7	2	2	2	1	0	6	8	0	0	0	0	10	5	0	0	1	1	0	0	1	3	1	1	2	1	2	30	1	1	1	0	1	0	0	0	0	0	0	0	0	0
1	2	1	5	7	1	4	1	1	0	30	6	0	0	0	6	0	7	0	4	2	2	0	2	0	5	1	1	4	1	2	43	1	1	3	0	1	0	0	0	0	0	0	0	0	0
1	1	1	4	7	1	1	3	1	0	0	0	0	0	0	0	0	0	0	0	0	0	0	0	0		1	3	1	0	2	10	0	1	3	1
1	2	1	3	3	1	1	3	1	0	9	8	0	0	0	0	0	4	0	0	0	3	3	0	0	5	1	2	2	1	2	37	1	1	1	0	1	0	0	0	0	0	0	0	0	0
1	2	1	3	6	1	1	3	4	0	2	0	0	0	0	1	1	0	0	0	1	0	0	0	0		2			1	2	4	0	1	3	1
1	2	1	4	7	1	2	1	1	0	0	0	0	1	0	10	0	0	0	4	0	7	7	0	0	5	1	1	2	1	2	19	1	1	3	0	1	0	0	0	0	0	0	0	0	0
1	2	1	5	5	3	2	2	1	2	12	0	0	1	0	1	0	0	0	1	0	1	1	0	0	5	1	1	6	1	2	1	0	1	3	1
1	2	1	3	7	1	1	3	1	0	1	1	0	0	0	0	0	0	0	0	1	0	0	0	0		2			1	2	1	0	1	3	1
1	2	1	3	7	2	2	2	1	10	8	3	2	1	0	0	20	0	0	2	1	5	0	0	5	5	1	2	2	1	2	29	0	1	3	0	0
1	2	1	5	7	2	2	2	1	8	0	0	1	0	0	3	2	0	0	2	0	5	5	0	0	5	1	1	2	0	2	20	0	1	3	0	0
1	1	2	8	7	1	2	2	1	0	6	0	0	0	0	0	0	0	0	3	0	0	0	0	0		2			1	2	10	0	2	3	1
1	2	1	2	5	3	4	1	5	0	20	0	0	0	0	0	0	0	0	2	0	1	0	0	1		2			0	2	1	0	1	3	1
1	2	1	3	7	1	1	3	1	0	0	3	0	0	0	0	0	0	0	1	0	2	2	0	0	5	1	1	2	1	2	49	1	1	1	0	1	0	1	1	0	0	1	0	1	1	2063	49	1	0
1	2	2	4	7	1	2	2	1	1	2	5	0	0	0	7	13	0	0	4	1	1	1	0	0	3	1	2	3	1	2	53	1	1	1	0	1	0	0	1	0	0	0	0	0	0
1	2	1	1	6	1	2	2	1	0	0	0	0	0	0	0	0	0	0	0	4	0	0	0	0		2			0	2	11	0	1	3	1
1	2	1	3	7	1	1	3	1	0	20	0	0	0	0	0	0	0	0	0	0	0	0	0	0		2			1	2	20	0	1	3	0	0
1	2	1	4	7	2	2	2	1	0	2	4	0	0	0	0	0	0	0	3	2	2	0	0	2	5	1	2	2	0	2	6	0	1	3	1
1	2	1	2	7	2	4	1	4	0	0	0	0	0	0	0	0	0	0	0	0	1	0	1	0		2			0	2	27	1	1	2	0	1	0	0	0	0	0	0	0	0	0
1	2	1	5	5	3	4	1	5	0	10	2	0	2	2	10	120	0	0	2	2	10	0	0	10	6	1	2	2	0	2	5	0	1	3	1
1	2	1	4	3	3	2	2	1	0	0	0	0	0	0	0	0	0	0	1	1	0	0	0	0		2			1	2	38	1	1	3	0	1	0	0	0	0	0	0	0	0	0
1	2	1	3	7	1	2	2	1	0	0	0	0	0	0	0	0	0	0	0	0	0	0	0	0		2			0	2	5	0	1	3	1
1	1	1	4	7	1	1	3	1	0	2	2	0	0	0	0	0	0	0	1	0	2	2	0	0	5	1	1	3	0	2	10	0	1	3	1
1	2	2	3	7	1	2	2	1	0	16	0	0	0	0	0	0	0	0	2	0	1	1	0	0	6	1	1	2	1	2	31	1	2	1	0	1	0	0	0	0	0	0	0	0	0
1	2	2	3	7	1	2	2	1	0	16	0	0	0	0	0	0	0	0	2	0	1	1	0	0	6	1	1	2	0	2	28	1	2	2	0	1	0	0	0	0	0	0	0	0	0
1	2	1	6	7	1	1	3	1	0	0	0	0	0	0	0	0	0	0	0	0	0	0	0	0		2			0	2	47	1	1	2	0	1	1	1	1	1	1	0	0	0	1	850	48	1	0
1	2	1	2	7	2	4	1	1	0	2	3	0	0	0	0	0	0	0	4	1	2	0	0	2	5	1	2	2	0	2	3	0	1	3	1
1	2	1	2	5	3	2	2	1	0	9	0	0	0	0	0	2	0	0	2	0	4	0	0	4		2			0	2	22	1	1	2	0	1	0	0	0	0	0	0	0	0	0
1	2	1	3	2	1	2	2	1	0	0	0	0	0	0	0	0	0	0	2	0	0	0	0	0		2			1	3	0		1	3	1
1	1	1	3	7	1	1	3	1	0	0	0	0	0	0	0	0	0	0	0	0	0	0	0	0		2			0	2	9	0	1	3	1
1	2	1	3	7	2	2	2	1	0	5	3	0	7	0	6	40	7	0	3	1	7	0	0	7		2			1	2	14	0	1	3	1
1	2	1	5	7	1	2	2	4	0	4	10	0	0	0	0	0	0	0	1	1	0	0	0	0		2			0	2	12	0	1	3	1
1	2	1	2	6	1	2	2	1	0	0	0	0	0	0	0	0	0	0	0	1	4	3	1	0	5	1	2	3	0	2	32	1	1	2	0	1	0	0	1	0	0	0	0	0	0
1	2	1	5	7	1	1	3	1	0	0	2	0	0	0	0	0	0	0	1	0	0	0	0	0		1	2	4	1	2	21	0	1	3	0	0
1	1	1	3	4	1	4	1	4	0	3	10	0	0	0	0	0	0	0	0	0	3	0	0	3	5	1	3	3	1	2	0		1	3	1
1	1	1	4	7	2	4	1	1	0	6	0	0	1	0	0	0	0	0	0	1	0	0	0	0		2			1	2	9	0	1	3	1
1	2	1	4	7	1	1	3	1	0	0	0	0	0	0	0	0	0	0	1	1	0	0	0	0		2			0	2	68	1	1	2	0	1	0	1	0	0	0	0	0	0	1	2060	69	0
1	2	1	3	7	2	2	2	1	1	1	0	0	0	0	0	0	0	0	1	1	0	0	0	0		1	1	3	0	2	11	0	1	3	1
1	2	1	6	7	1	2	2	1	0	5	0	0	0	0	0	0	0	0	1	1	1	1	0	0	3	1	2	3	1	2	28	1	1	1	0	1	0	0	0	0	0	0	0	0	0
1	2	1	2	7	1	2	2	1	0	0	0	0	0	0	0	0	0	0	0	0	0	0	0	0		2			1	2	7	0	1	3	1
1	2	1	4	7	1	4	1	1	0	0	28	0	0	0	0	0	0	0	0	0	0	0	0	0		2			0	2	46	1	1	2	0	1	0	0	0	0	0	0	0	0	0
1	1	1	6	7	1	2	2	1	0	0	0	0	0	0	0	0	0	0	0	0	0	0	0	0		2			1	2	22	1	1	1	0	1	0	0	0	0	0	0	0	0	0
1	2	1	4	5	2	2	2	1	0	20	0	0	1	0	3	0	0	0	3	0	3	0	0	0		2			0	2	15	1	1	3	0	1	0	0	0	0	0	0	0	0	0
1	2	1	3	7	1	4	1	4	0	10	2	14	0	0	0	0	0	0	0	0	0	0	0	0		2			0	2	10	0	1	3	1
1	2	1	4	7	3	1	3	1	0	3	0	0	0	0	0	0	0	0	1	1	3	3	0	0	5	1	1	3	1	2	37	1	1	3	0	1	0	0	0	0	0	0	0	0	0
1	2	2	5	7	2	2	2	1	0	7	18	0	0	0	0	0	0	0	2	0	0	0	0	0		2			0	2	43	1	1	2	0	1	0	0	1	0	0	0	0	0	0
1	2	1	3	4	3	2	2	1	0	1	0	0	1	0	12	70	0	0	1	1	2	2	0	0	3	1	2	2	0	2	5	0	1	3	1
1	2	1	3	2	3	2	2	4	0	2	0	0	0	0	0	0	0	0	0	0	0	0	0	0		2			0	2	28	1	1	2	0	1	0	1	0	0	0	0	0	0	1	21	29	1	0
1	2	1	3	3	1	4	1	5	16	11	0	0	0	0	0	100	0	0	2	0	0	0	0	0		2			0	2	73	1	1	2	0	1	0	0	0	0	0	0	0	0	0
1	2	1	3	7	1	2	2	1	0	0	4	0	0	0	0	0	0	0	2	0	0	0	0	0		2			0	2	4	0	1	3	1
1	2	1	2	7	1	2	2	1	0	2	8	0	0	0	0	0	0	0	4	0	0	0	0	0		2			1	2	9	0	1	3	1
1	2	1	4	7	1	4	1	1	0	0	0	0	0	0	0	0	0	0	1	0	0	0	0	0		2			0	2	40	1	1	2	0	1	0	0	1	0	0	1	1	1	1	3414	41	1	1
3	2	1	2	7	1	4	1	5	0	0	0	0	0	0	0	0	0	0	0	1	0	0	0	0		2			1	3	16	1	1	3	0	1	0	0	0	0	0	0	0	0	0
1	3	1	3	7	1	2	2	1	0	0	0	0	0	0	0	0	0	0	1	0	0	0	0	0		2			0	2	9	0	1	3	1
1	2	1	3	7	3	4	2	1	0	11	0	0	0	0	0	0	0	0	1	0	2	2	0	0	3	1	2	2	1	2	8	0	1	3	1
1	2	2	4	7	3	2	2	1	0	7	12	0	1	0	2	0	0	0	1	0	4	4	0	0	5	1	1	3	0	2	57	1	1	2	0	1	0	0	0	0	0	0	0	0	0
1	2	1	4	7	1	2	2	1	0	0	0	0	0	0	0	0	0	0	2	0	0	0	0	0		2			1	2	18	1	1	3	0	1	0	0	0	0	0	0	0	0	0
1	2	1	3	7	1	2	2	1	0	0	2	0	1	0	0	0	0	0	1	1	0	0	0	0		2			1	2	9	0	1	8	1
1	2	1	2	5	3	4	1	5	0	20	0	0	0	0	0	0	0	0	2	0	1	0	0	1		2			0	2	38	1	1	2	0	1	0	0	0	0	0	0	0	0	0
1	2	2	4	7	2	1	3	1	0	0	0	0	0	0	0	0	0	0	0	0	0	0	0	0		2			0	2	41	1	1	2	0	1	0	0	0	0	0	0	0	0	0
1	2	1	5	7	2	2	2	1	0	5	0	0	0	0	0	0	0	0	2	0	2	0	0	0		2			0	3	5	0	1	3	1
1	2	2	4	6	1	2	2	1	0	4	0	0	0	0	0	0	0	0	0	1	0	0	0	0		2			0	2	3	0	2	3	1
1	2	2	3	4	1	4	1	4	5	15	15	0	1	0	0	0	0	0	2	0	2	0	2	0		2			1	3	5	0	2	3	1
1	1	1	4	3	1	4	1	1	3	20	2	0	0	0	0	0	0	0	2	2	0	0	0	0		2			0	2	15	1	1	3	0	1	0	0	0	0	0	0	0	0	0
1	1	1	4	7	1	1	3	1	0	0	16	0	0	0	0	0	0	0	0	1	0	0	0	0		2			1	2	3	0	1	3	1
1	1	1	4	7	1	1	3	1	2	9	8	0	0	0	0	0	0	0	1	2	0	0	0	0		2			0	2	38	1	1	2	0	1	0	0	0	0	0	0	0	0	0
1	2	1	3	4	3	4	1	5	0	15	2	8	1	2	4	50	0	0	5	1	2	2	0	0	5	1	2	2	1	2	37	1	1	1	0	1	0	0	0	0	0	0	0	0	0
1	2	1	3	7	2	2	2	1	0	8	20	0	0	0	0	0	0	0	3	1	2	2	0	0	3	1	2	2	1	2	31	0	1	3	0	0
1	1	1	3	6	1	4	1	1	0	0	9	0	0	0	0	0	0	0	0	0	1	0	0	1		2			0	2	35	1	1	2	0	1	0	0	0	0	0	0	0	0	0
1	2	1	4	7	2	2	2	1	2	1	10	0	2	0	0	0	0	0	1	1	5	0	0	5		2			0	2	4	0	1	3	1
1	2	1	3	7	1	4	1	4	0	3	2	0	0	0	0	0	0	0	0	0	0	0	0	0		2			0	I	19	1	1	2	0	1	0	0	0	0	0	0	0	0	0
1	2	1	2	4	3	4	1	5	0	8	0	1	2	0	2	80	0	0	3	0	0	0	0	0		2			0	2	29	1	1	2	0	1	0	0	0	0	0	0	0	0	0
1	2	1	3	7	1	2	2	1	0	2	0	0	0	0	0	0	0	0	0	0	0	0	0	0		2			1	2	22	1	1	3	0	1	0	0	0	0	0	0	0	0	0
1	2	1	3	7	3	1	3	1	0	0	0	0	0	0	0	0	0	0	0	0	0	0	0	0		2			1	2	3	0	1	3	1
1	2	2	4	7	1	2	1	1	0	10	4	0	0	0	0	0	0	0	1	1	3	3	0	0	3	1	1	2	0	2	53	1	1	2	0	1	0	0	0	0	0	0	0	0	0
1	2	1	4	7	2	2	2	1	0	30	7	0	1	0	1	23	0	0	1	1	4	4	0	0	6	1	1	2	0	2	71	1	1	4	0	1	0	0	0	0	0	0	0	0	0
1	2	2	3	7	1	4	1	1	0	0	0	0	0	0	0	0	0	0	1	0	0	0	0	0		2			0	2	22	1	2	2	0	1	0	0	0	0	0	0	0	0	0
1	2	1	6	7	2	2	2	1	0	30	0	20	0	0	32	40	20	0	2	3	30	0	0	30		2			1	2	79	1	1	1	0	1	0	0	0	0	0	0	0	0	0
1	2	1	2	2	1	4	1	1	0	3	0	0	0	0	0	0	0	0	0	0	0	0	0	0		2			1	2	26	1	1	1	0	1	0	0	0	0	0	0	0	0	0
1	2	1	4	7	1	1	3	1	0	0	0	0	0	0	0	0	0	0	0	0	0	0	0	0		2			1	3	16	1	1	3	0	1	0	0	0	0	0	0	0	0	0
1	1	1	4	7	2	2	2	1	0	10	3	0	0	0	0	0	0	0	2	0	0	0	0	0		1	1	2	1	2	41	1	1	1	0	1	0	0	0	0	0	0	0	0	0
1	2	2	3	5	2	2	2	1	0	0	0	0	0	0	0	0	0	0	1	0	1	0	0	0		2			0	2	18	0	1	3	0	0
3	2	1	3	7	1	2	2	1	0	1	0	0	0	0	1	0	0	0	1	1	6	6	0	0	5	1	1	1	0	2	8	0	1	3	1
1	2	1	4	7	1	2	2	1	0	0	0	0	0	0	0	0	0	0	0	0	1	1	0	0	6	1	1	2	1	2	51	1	1	1	0	1	0	0	0	0	0	0	0	0	0
1	1	2	3	7	2	2	2	1	0	0	8	0	0	0	0	0	0	0	0	0	0	0	0	0		2			1	2	5	0	1	3	1
1	2	1	2	6	1	2	2	1	0	0	9	0	0	0	0	0	0	0	0	0	1	1	0	0	5	1	1	5	0	2	3	0	1	3	1
1	2	1	4	6	1	1	3	1	0	0	0	0	0	0	4	0	0	0	1	0	1	1	0	0	5	1	1	6	1	2	20	1	1	3	0	1	0	0	0	0	0	0	0	0	0
1	2	2	3	7	1	1	3	1	0	2	4	0	0	0	0	0	0	0	1	0	6	6	0	0	5	1	1	2	0	2	64	1	1	2	0	1	0	0	0	0	0	0	0	0	0
3	2	1	3	7	3	2	2	1	6	0	2	0	0	0	0	0	0	0	0	0	2	0	0	0		2			1	2	4	0	1	3	1
1	1	1	3	7	1	2	2	1	0	1	2	0	0	0	0	0	0	0	0	0	1	1	0	0	3	1	1	2	0	2	14	0	1	3	1
1	2	1	3	6	1	4	3	4	0	0	0	0	0	0	0	0	0	0	0	0	0	0	0	0		2			0	2	20	1	1	2	0	1	0	0	0	0	0	0	0	0	0
1	2	2	3	4	1	2	2	1	0	1	0	1	1	0	0	0	0	0	1	1	0	0	0	0		2			1	2	8		1	3	1
1	2	1	3	7	1	4	1	1	0	4	0	0	0	0	0	0	0	0	1	1	1	0	1	0		2			0	2	38	1	1	2	0	1	0	0	0	0	0	0	0	0	0
1	1	1	4	7	1	1	3	1	0	20	0	0	0	0	2	0	0	0	1	0	0	0	0	0		2			1	2	41	0	1	3	0	0
1	1	2	5	7	1	1	3	1	0	0	0	0	0	0	0	0	0	0	0	0	1	1	0	0	6	1	1	2	0	2	34	1	2	2	0	1	0	0	0	0	0	0	0	0	0
1	2	1	4	7	1	2	2	1	7	4	0	0	0	0	0	0	0	0	2	1	1	0	1	0		2			1	2	19	1	1	3	0	1	0	0	0	0	0	0	0	0	0
1	2	1	3	2	1	1	3	1	0	0	0	0	0	0	0	0	0	0	2	1	0	0	0	0		2			1	2	11	0	1	3	1
1	2	1	4	7	1	2	2	1	5	1	0	0	0	0	0	0	0	0	5	1	0	0	0	0		1	3	2	1	2	17	0	1	8	0	0
1	1	1	4	7	3	2	2	1	0	2	0	0	0	0	0	0	0	0	0	0	0	0	0	0		2			0	2	17	1	1	3	0	1	0	0	0	0	0	0	0	0	0
1	2	1	3	3	1	4	1	1	4	6	0	4	1	0	2	10	0	0	1	1	1	1	0	0	6	1	1	6	1	2	36	1	1	1	0	1	0	0	0	0	0	0	0	0	0
1	2	1	2	2	1	4	1	4	0	5	0	0	0	0	0	0	0	0	0	0	0	0	0	0		2			0	2	19	1	1	2	0	1	0	0	0	0	0	0	0	0	0
1	2	1	3	5	3	2	2	1	0	0	0	0	1	0	0	3	0	0	2	1	1	1	0	0	5	1	1	3	0	2	9	0	1	3	1
1	2	1	5	7	3	4	2	1	2	20	2	0	0	0	0	0	0	0	4	4	0	0	0	0		2			1	2	21	1	1	3	0	1	0	0	0	0	0	0	0	0	0
1	2	1	5	4	1	4	1	5	8	5	6	0	2	0	0	30	0	0	4	1	2	1	0	1	5	1	1	2	0	2	17	1	1	3	0	1	0	0	0	0	0	0	0	0	0
1	2	2	4	2	1	2	2	1	20	10	9	0	3	2	0	3	0	0	0	0	3	3	0	0	4	1	2	3	0	2	12	0	2	3	1
1	2	1	3	7	1	4	1	1	0	0	0	0	0	0	0	0	0	0	0	0	0	0	0	0		2			1	2	6	0	1	3	1
1	2	1	3	6	1	2	2	1	0	0	0	0	0	0	0	0	0	0	0	0	0	0	0	0		2			0	2	34	1	1	2	0	1	0	0	0	0	0	0	0	0	0
1	1	1	4	7	1	1	3	1	0	0	0	0	0	0	0	0	0	0	0	0	0	0	0	0		2			0	2	25	1	1	3	0	1	0	0	0	0	1	0	0	0	0
1	1	1	4	7	1	1	3	1	0	0	0	0	0	0	0	0	0	0	0	0	0	0	0	0		2			1	3	22	1	1	3	0	1	1	1	0	1	1	0	0	0	1	192	22	1	0
1	2	1	4	6	1	2	2	1	0	0	0	0	0	0	0	0	0	0	0	0	0	0	0	0		2			1	2	20	1	1	3	0	1	0	0	0	0	0	0	0	0	0
3	2	1	3	7	1	2	2	1	0	0	0	0	0	0	0	0	0	0	0	0	0	0	0	0		2			1	2	27	1	1	1	0	1	0	1	1	0	0	0	0	0	1	2112	28	1	0
1	1	2	4	7	1	1	3	1	0	1	6	0	0	0	0	0	0	0	2	0	0	0	0	0		2			0	2	21	1	3	2	0	1	0	0	0	0	0	0	0	0	0
1	2	2	6	7	1	2	2	1	0	7	3	0	0	0	0	0	0	0	2	1	0	0	0	0		2			1	2	54	0	1	1	0	0
1	2	1	2	7	1	2	2	1	0	0	0	0	0	0	0	0	0	0	0	0	1	1	0	0	5	1	2	3	1	2	1	0	1	3	1
1	2	1	2	6	1	2	2	5	0	8	0	0	0	0	0	0	0	0	0	0	0	0	0	0		2			1	2	4	0	1	3	1
1	2	2	4	5	3	4	1	4	0	0	20	0	0	0	0	0	0	0	1	3	2	2	0	0	5	1	2	2	1	3	5	0	3	3	1
1	2	1	2	2	2	4	1	1	0	8	0	0	1	0	0	70	0	0	1	2	5	0	0	5	3	1	2	2	0	2	49	1	1	2	0	1	0	0	0	0	0	0	0	0	0
1	2	1	3	6	1	1	3	4	0	8	3	0	0	0	0	0	0	0	0	0	4	4	0	0	3	1	1	3	0	2	1	0	1	3	1
1	2	1	5	7	1	2	2	1	0	0	0	0	0	0	0	0	0	0	0	0	0	0	0	0		1	2	3	1	2	21	1	1	3	0	1	0	0	0	0	0	0	0	0	0
1	2	1	3	7	1	2	2	1	0	2	0	0	0	0	0	0	0	0	1	1	1	1	0	0	6	1	1	2	1	2	48	1	1	1	0	1	0	0	0	0	0	0	0	0	0
1	2	1	4	7	2	2	2	1	3	10	4	0	1	0	0	0	0	0	3	0	15	0	0	0		2			1	2	23	1	1	3	0	1	0	0	0	0	0	0	0	0	0
1	2	1	3	7	1	4	1	4	0	8	0	0	0	0	0	0	0	0	1	0	0	0	0	0		2			1	2	3	0	1	3	1
1	2	1	3	7	2	2	2	1	0	1	16	0	0	0	0	8	0	0	3	1	0	0	0	0		1	2	2	0	2	41	1	1	2	0	1	0	0	0	0	0	0	0	0	0
1	2	1	1	5	3	2	2	1	0	0	0	0	0	0	0	0	0	0	0	0	0	0	0	0		2			1	2	84	1	1	1	0	1	0	0	0	0	0	0	0	0	0
1	2	2	5	7	1	1	3	1	0	2	4	0	0	0	0	0	0	0	2	0	0	0	0	0		2			1	2	7	0	3	3	1
1	2	2	3	7	1	2	2	1	0	30	2	1	1	0	0	0	0	0	2	1	5	0	0	5	4	1	2	2	0	2	22	0	2	2	0	0
1	2	1	3	6	1	4	1	1	0	8	4	0	0	0	0	0	0	0	0	0	0	0	0	0		2			1	2	22	1	1	1	0	1	0	0	0	0	0	0	0	0	0
1	2	1	4	7	1	4	1	1	0	0	20	0	0	0	0	0	0	0	5	2	15	0	0	15	5	1	1	2	1	2	16	1	1	3	0	1	0	0	0	0	0	0	0	0	0
1	2	1	3	6	1	4	2	4	6	2	9	0	0	0	0	0	0	0	0	0	1	1	0	0	5	1	1	5	1	2	0		1	3	1
3	2	1	2	7	2	2	2	1	0	0	0	0	0	0	0	0	0	0	0	0	0	0	0	0		2			1	2	33	1	1	1	0	1	0	0	0	0	0	0	0	0	0
1	2	1	3	6	1	4	1	4	0	0	6	0	0	0	0	0	0	0	1	0	0	0	0	0		2			0	2	3	0	1	3	1
1	2	1	5	5	3	2	2	1	0	19	2	0	0	0	0	0	2	0	1	1	0	0	0	0		2			0	2	51	1	1	2	0	1	0	0	0	0	0	0	0	0	0
1	2	1	4	5	3	2	2	5	20	20	0	6	3	0	2	20	0	0	2	1	0	0	0	0		1	2	2	0	2	8	0	1	3	1
1	2	1	3	7	3	2	2	1	0	4	4	0	0	0	0	0	0	0	4	0	0	0	0	0		2			0	2	4	0	1	3	1
1	2	1	5	7	2	2	2	1	0	10	0	0	0	0	0	0	0	0	3	1	2	2	0	0	5	1	1	2	1	2	18	0	1	3	0	0
1	1	1	4	7	1	1	3	4	0	0	0	0	0	0	0	0	0	0	1	0	0	0	0	0		2			1	2	20	1	1	3	0	1	0	0	0	0	0	0	0	0	0
1	2	1	4	7	1	2	2	1	0	0	0	0	0	0	0	0	0	0	0	0	0	0	0	0		2			1	2	19	1	1	3	0	1	0	1	1	0	0	0	0	0	1	1052	20	1	0
1	2	1	3	7	3	2	2	1	0	0	0	0	0	0	0	0	0	0	1	1	0	0	0	0		2			1	2	43	1	1	1	0	1	0	0	1	0	1	0	0	0	1	2758	44	1	0
1	2	1	2	6	1	4	2	4	0	4	4	0	0	0	0	0	0	0	0	1	0	0	0	0		2			0	U	0		1	3	1
1	1	2	3	7	1	2	2	1	4	15	3	0	2	0	0	9	0	0	4	3	6	6	0	0	5	1	2	5	0	2	2	0	2	3	1
1	1	2	3	7	1	1	3	1	0	0	0	0	0	0	0	0	0	0	2	0	0	0	0	0		2			0	2	23	0	1	7	0	0
1	2	2	4	7	1	1	3	1	0	0	15	0	0	0	0	0	0	0	2	2	10	10	0	0	1	1	1	2	0	2	16	1	2	3	0	1	0	0	0	0	0	0	0	0	0
1	2	1	3	7	2	4	1	1	0	10	4	0	0	0	0	4	0	0	1	1	8	0	0	8	5	1	2	2	1	2	11	0	1	3	1
1	2	1	3	7	1	4	2	1	0	14	4	0	0	0	0	0	0	0	1	1	0	0	0	0		2			1	3	13		1	3	1
1	1	1	5	7	1	2	2	1	0	6	0	0	0	0	0	0	0	0	5	0	0	0	0	0		2			0	2	13	0	1	3	1
1	1	1	4	7	3	2	2	1	0	2	0	0	0	0	0	0	0	0	1	1	1	1	0	0	5	1	1	2	1	2	12	0	1	3	1
1	2	2	4	7	1	2	2	1	0	10	5	0	0	0	0	0	4	0	2	0	0	0	0	0		2			0	2	55	1	1	2	0	1	0	0	1	0	1	0	0	0	1	518	56	1	1
1	1	2	6	7	1	2	2	1	5	20	0	0	0	0	0	0	0	0	0	0	0	0	0	0		2			1	2	8	0	3	3	1
1	2	1	3	7	1	2	2	1	0	4	4	0	0	0	0	0	0	0	1	1	0	0	0	0		1	2	2	0	2	14	0	1	8	1
1	2	1	2	6	1	2	1	4	0	0	0	0	0	0	0	0	0	0	0	0	2	2	0	0	3	1	1	3	1	2	7	0	1	3	1
1	2	1	3	5	3	4	2	5	4	15	0	0	0	0	0	0	0	0	0	0	6	0	0	6	5	1	1	2	0	2	20	1	1	2	0	1	1	0	0	0	0	0	1	0	1	1303	20	1	0
1	1	1	5	7	1	2	2	1	0	0	0	0	0	0	0	0	0	0	0	0	0	0	0	0		2			1	2	12	0	1	3	1
2	2	1	3	7	1	2	2	1	0	0	0	0	0	0	0	0	0	0	0	0	0	0	0	0		2			1	2	9	0	1	3	1
1	2	1	4	7	3	2	2	1	0	0	0	0	0	0	0	0	0	0	0	0	0	0	0	0		2			0	2	14	0	1	3	1
1	2	1	3	7	1	1	3	1	0	0	0	0	0	0	0	0	0	0	0	1	2	2	0	0	5	1	1	1	1	2	15	1	1	3	0	1	0	0	0	0	0	0	0	0	0
1	2	2	5	7	1	4	1	1	14	8	2	0	0	0	0	0	0	0	0	0	0	0	0	0		2			0	2	44	1	1	2	0	1	0	0	0	0	0	0	0	0	0
1	2	1	4	5	3	2	1	4	16	10	4	0	3	0	0	0	0	0	0	0	7	6	0	1	5	1	2	2	1	2	45	1	1	1	0	1	0	0	0	0	0	0	0	0	0
1	2	1	4	7	1	1	3	1	7	10	5	0	0	0	0	0	0	0	1	0	0	0	0	0		2			0	2	6	0	1	3	1
1	2	1	3	7	2	2	2	4	0	2	0	0	0	0	0	0	0	0	0	0	0	0	0	0		2			0	2	2	0	1	3	1
1	2	1	4	7	1	1	3	1	0	0	0	0	0	0	0	0	0	0	0	0	0	0	0	0		2			0	2	1	0	1	3	1
1	2	1	3	3	2	4	1	1	0	0	0	0	0	0	0	0	0	0	0	0	0	0	0	0		2			1	2	10	0	1	3	1
1	2	1	4	7	2	1	3	1	0	2	0	0	0	0	0	0	0	0	0	0	0	0	0	0		2			1	2	22	1	1	1	0	1	0	0	0	0	0	0	0	0	0
1	2	1	2	7	1	4	2	4	0	20	0	0	0	0	0	0	0	0	1	0	0	0	0	0		2			1	2	3	0	1	3	1
1	1	2	6	7	1	1	3	1	0	0	2	0	0	0	0	0	0	0	0	0	1	1	0	0	5	1	1	1	0	2	24	1	3	2	0	1	0	0	0	0	0	0	0	0	0
1	2	1	2	6	1	1	3	4	0	0	0	0	0	0	0	0	0	0	1	0	0	0	0	0		2			0	2	4	0	1	3	1
1	2	1	3	3	1	2	2	1	0	8	5	0	0	1	4	8	0	0	2	0	1	0	0	1		2			0	2	5	0	1	3	1
1	2	1	5	7	1	1	3	1	0	0	0	0	0	0	0	0	0	0	0	0	0	0	0	0		2			1	2	42	0	1	1	0	0
1	2	1	2	7	1	2	2	1	0	2	2	0	0	0	0	0	0	0	1	0	0	0	0	0		2			0	2	20	1	1	2	0	1	0	0	0	0	0	0	0	0	0
1	1	1	5	7	1	1	3	1	0	0	1	0	0	0	0	0	0	0	0	0	2	2	0	0	5	1	1	6	1	2	39	1	1	1	0	1	0	0	0	0	0	0	0	0	0
2	2	1	2	7	1	2	2	4	3	4	3	0	0	0	0	0	0	0	1	0	3	3	0	0	5	1	1	2	1	2	5	0	1	3	1
1	2	1	1	6	1	4	1	4	0	4	0	0	0	0	0	0	0	0	3	0	0	0	0	0		2			1	2	7	0	1	3	1
1	2	1	4	7	2	1	3	1	8	4	2	0	0	0	0	0	0	0	2	0	2	0	2	0		2			1	2	46	1	1	3	0	1	0	0	0	0	0	0	0	0	0
1	2	1	3	5	3	4	1	5	0	10	0	0	1	0	0	0	0	0	1	0	5	0	0	5	3	1	3	2	1	2	35	1	1	1	0	1	0	0	0	0	0	0	0	0	0
1	2	1	3	7	1	4	1	1	0	6	2	0	0	0	0	0	0	0	0	0	0	0	0	0		2			1	2	6	0	1	3	1
1	1	1	5	7	1	2	2	1	0	0	0	0	0	0	0	0	0	0	0	0	0	0	0	0		2			0	2	0		1	3	1
1	1	1	2	5	2	2	2	4	0	1	2	0	0	0	0	0	0	0	5	0	0	0	0	0		2			1	2	34	0	1	1	0	0
1	2	1	4	7	1	2	2	1	0	0	0	0	1	0	0	0	0	0	2	0	7	2	0	5	6	1	1	2	0	2	11	0	1	3	1
1	2	2	5	7	1	4	1	1	14	8	2	0	0	0	0	0	0	0	0	0	0	0	0	0		2			1	2	48	1	1	1	0	1	0	0	0	0	0	0	0	0	0
1	2	1	2	7	1	4	1	1	0	0	0	0	0	0	0	0	0	0	1	1	0	0	0	0		2			1	2	35	0	1	1	0	0
1	2	1	5	7	1	2	2	1	0	0	0	0	0	0	0	0	0	0	1	0	3	3	0	0	3	1	1	6	1	2	39	1	1	1	0	1	0	0	0	0	0	0	0	0	0
1	2	1	2	7	1	4	1	1	2	0	2	0	0	0	0	0	0	0	1	0	3	3	0	0	6	1	1	5	0	2	25	1	1	2	0	1	0	0	0	0	0	0	0	0	0
3	1	1	2	7	1	2	2	1	2	10	4	0	0	0	0	0	0	0	2	2	5	5	0	0	3	1	1	2	1	2	5	0	1	3	1
1	2	1	2	2	1	4	1	1	0	0	4	6	0	0	0	0	0	0	0	0	0	0	0	0		2			1	2	4	0	1	3	1
1	2	1	2	7	2	4	1	1	2	15	0	0	0	0	0	25	0	0	2	1	3	0	0	3	5	1	1	2	1	2	1	0	1	3	1
1	1	1	3	7	1	1	3	1	0	0	0	0	0	0	0	0	0	0	0	0	0	0	0	0		1	2	3	1	2	12	0	1	3	1
1	2	1	3	7	1	1	3	1	0	0	0	0	0	0	0	0	0	0	0	0	0	0	0	0		2			1	2	26	1	1	1	0	1	0	0	0	0	0	0	0	0	0
2	2	1	3	7	1	1	3	1	0	0	0	0	0	0	0	0	0	0	0	0	0	0	0	0		2			1	3	8	0	1	3	1
1	2	1	4	3	1	2	2	1	0	10	0	0	1	0	1	10	5	0	0	0	8	0	0	8	5	1	2	2	0	I	20	0	1	3	0	0
1	2	1	3	2	1	4	1	5	2	3	1	0	0	0	0	0	0	0	10	1	0	0	0	0		2			1	3	7	0	1	3	1
1	2	1	3	7	1	4	1	1	0	0	1	0	0	0	0	0	0	0	1	0	0	0	0	0		2			1	2	23	1	1	3	0	1	0	0	0	0	0	0	0	0	0
1	2	1	3	7	2	2	2	1	0	20	3	0	1	0	0	0	0	0	2	1	9	0	0	9	5	1	1	2	1	2	8	0	1	3	1
1	2	1	2	6	1	4	1	5	0	0	0	0	0	0	0	0	0	0	0	0	0	0	0	0		2			1	3	2	0	1	3	1
1	2	2	3	5	2	2	2	1	0	0	0	0	0	0	0	0	0	0	1	0	1	0	0	0		2			0	2	17	1	2	2	0	1	0	0	0	0	0	0	0	0	0
1	2	1	2	7	2	2	2	5	0	0	0	0	0	0	0	0	0	0	0	0	0	0	0	0		2			0	2	80	1	1	4	0	1	0	1	0	0	0	0	0	0	1	2840	81	5
1	2	2	4	7	1	4	2	1	0	0	0	0	0	0	0	0	0	0	0	0	0	0	0	0		2			1	2	6	0	1	3	1
1	2	1	4	7	3	2	2	1	2	10	10	0	1	0	0	0	0	0	1	1	2	2	0	0	5	1	1	2	0	2	2	0	1	3	1
1	1	1	2	7	1	4	1	4	0	0	7	0	0	0	0	0	0	0	2	1	0	0	0	0		1	3	3	1	2	6	0	1	3	1
1	1	1	5	7	3	2	2	1	0	5	0	0	0	0	0	0	0	0	0	0	0	0	0	0		2			1	2	51	1	1	1	0	1	0	0	0	0	0	0	0	0	0
1	1	1	3	7	1	1	3	1	0	10	2	0	0	0	0	0	0	0	1	0	0	0	0	0		2			1	2	30	1	1	1	0	1	0	0	1	0	0	0	0	0	0
1	1	1	4	7	1	2	2	1	0	4	0	0	0	0	0	0	0	0	1	1	1	1	0	0	3	1	1	2	1	2	16	1	1	3	0	1	0	0	0	0	0	0	0	0	0
1	2	1	4	2	1	2	2	4	7	5	5	3	6	3	0	6	0	0	3	3	1	0	0	1	6	1	2	3	0	2	8	0	1	3	1
1	1	1	2	2	1	2	2	1	0	3	4	0	0	0	0	0	0	0	1	6	0	0	0	0		2			0	2	1		1	3	1
1	1	1	2	7	1	2	2	1	0	0	0	0	0	0	0	0	0	0	2	0	1	1	0	0	3	1	2	3	0	2	4	0	1	3	1
1	1	1	5	7	2	2	2	1	0	0	0	0	0	0	0	0	0	0	0	0	0	0	0	0		2			0	2	12	0	1	3	1
1	1	1	3	7	2	2	2	1	0	0	0	0	0	0	0	0	0	0	1	4	0	0	0	0		1	2	2	0	2	8	0	1	3	1
1	2	1	1	7	1	4	1	4	0	0	0	0	0	0	0	0	0	0	0	0	15	15	0	0	5	1	1	6	1	2	38	1	1	1	0	1	0	0	0	0	0	0	0	0	0
3	2	1	2	7	1	2	1	1	0	0	0	0	0	0	0	0	0	0	0	0	0	0	0	0		2			0	2	2	0	1	2	1
2	2	1	2	7	2	2	2	4	0	0	0	0	0	0	0	0	0	0	0	0	0	0	0	0		2			1	2	21	0	1	1	0	0
1	2	1	3	6	1	4	1	5	0	1	0	0	0	0	0	0	0	0	1	0	0	0	0	0		2			0	3	12	0	1	3	1
1	2	1	3	7	1	4	1	5	3	20	0	0	1	0	0	0	0	0	3	2	0	0	0	0		2			0	2	4	0	1	3	1
1	3	1	3	7	2	2	1	1	0	0	0	0	0	0	0	0	0	0	1	0	0	0	0	0		1	1	6	0	2	25	1	1	2	0	1	0	0	0	0	0	0	0	0	0
1	2	1	3	7	1	2	2	1	0	12	0	0	0	0	0	0	0	0	1	1	3	3	0	0	5	1	1	2	0	2	14	0	1	3	1
1	2	1	3	2	1	4	1	1	0	40	0	0	0	0	0	0	0	0	1	1	1	1	0	0	3	1	1	3	0	2	15	1	1	3	0	1	0	0	0	0	0	0	0	0	0
1	2	1	2	7	3	2	2	1	0	5	0	0	0	0	0	0	0	0	1	0	5	0	0	0		2			1	2	3	0	1	3	1
1	2	1	3	7	1	2	1	1	0	10	0	0	0	0	0	0	0	0	0	0	13	13	0	0	3	1	1	3	0	3	0		1	3	1
1	1	1	5	7	2	4	1	4	0	0	1	0	0	0	0	0	0	0	0	0	0	0	0	0		2			1	2	3	0	1	3	1
1	2	1	3	7	1	2	2	1	0	5	6	0	0	0	0	0	0	0	3	1	3	3	0	0	3	1	2	2	0	2	6	0	2	3	1
1	2	2	4	7	1	2	2	1	0	15	2	0	0	0	0	0	0	0	1	0	0	0	0	0		2			1	2	25	1	2	1	0	1	1	1	1	1	1	1	1	1	1	3263	26	5
1	2	2	5	7	2	2	2	1	2	5	2	0	0	0	2	2	0	0	3	0	2	0	0	0		2			1	2	19	1	1	3	0	1	0	0	0	0	0	0	0	0	0
1	2	1	2	5	3	4	1	5	0	0	0	0	0	0	0	0	0	0	0	0	0	0	0	0		2			0	2	4	0	1	3	1
1	2	1	6	7	2	2	2	1	0	8	2	0	0	0	0	0	0	0	1	1	4	4	0	0	5	1	1	2	0	2	4	0	1	3	1
1	2	2	4	7	3	4	1	1	0	15	0	0	0	0	0	40	3	0	2	0	1	0	0	1	6	1	1	2	0	2	1	0	2	3	1
1	2	1	1	6	1	2	2	4	0	0	10	0	0	0	0	0	0	0	0	0	1	0	1	0		2			0	2	28	1	1	2	0	1	0	0	0	0	0	0	0	0	0
1	1	1	3	6	2	2	2	4	0	5	0	0	0	0	0	20	0	0	0	0	2	0	0	2	5	1	1	2	1	2	8	0	1	3	1
1	2	1	3	6	1	2	2	1	0	0	2	0	0	0	0	0	0	0	0	0	0	0	0	0		2			1	2	4	0	1	3	1
1	1	1	4	7	1	1	3	1	0	2	0	0	0	0	0	0	0	0	0	0	0	0	0	0		2			0	2	65	1	1	2	0	1	0	0	0	0	0	0	0	0	0
1	2	1	3	7	2	2	2	1	0	4	0	0	2	0	0	0	0	0	3	0	0	0	0	0		2			0	2	1	0	1	3	1
1	2	2	7	7	1	4	1	1	0	0	0	0	0	0	0	0	0	0	2	0	0	0	0	0		2			1	2	4	0	4	3	1
1	2	1	3	7	2	4	1	1	0	0	10	1	5	0	0	20	0	0	2	0	11	0	0	11	5	1	2	2	1	2	9	0	1	3	1
1	2	1	3	7	1	1	3	1	0	0	0	0	0	0	0	0	0	0	0	0	2	2	0	0	5	1	1	3	0	2	6	0	1	3	1
1	1	1	4	7	1	4	2	1	0	100	0	0	0	0	0	0	0	0	2	0	7	2	0	5	5	1	1	1	0	2	2	0	1	3	1
1	2	1	3	6	1	1	3	1	0	4	0	0	0	0	0	0	0	0	0	0	0	0	0	0		2			1	2	4	0	1	3	1
1	2	2	4	7	4	2	2	4	0	0	9	0	0	0	0	0	0	0	2	0	3	3	0	0	3	1	1	2	0	2	8	0	2	3	1
1	2	1	4	7	1	1	3	1	0	0	0	0	0	0	0	0	0	0	1	3	0	0	0	0		2			1	2	44	0	1	3	0	0
1	2	1	5	7	2	2	2	1	1	3	4	0	0	0	0	0	0	0	0	0	0	0	0	0		2			1	2	53	1	1	1	0	1	0	0	0	0	0	0	0	0	0
3	2	1	2	7	2	2	2	1	0	4	30	0	0	0	6	0	0	0	2	2	7	7	0	0	6	1	2	2	0	2	21	1	1	3	0	1	0	0	0	0	0	0	0	0	0
1	2	1	2	2	1	4	1	1	0	3	0	0	0	0	0	0	0	0	0	0	0	0	0	0		2			1	2	3	0	1	3	1
3	2	1	2	7	3	2	2	5	0	30	0	0	0	0	0	0	0	0	1	1	0	0	0	0		2			1	2	34	1	1	1	0	1	0	0	0	0	0	0	0	0	0
1	1	1	4	7	2	2	2	1	0	0	1	0	0	0	0	0	0	0	0	0	0	0	0	0		2			1	2	23	1	1	3	0	1	0	0	0	0	0	0	0	0	0
1	2	1	5	7	1	1	3	1	0	4	0	0	0	0	0	0	0	0	0	0	0	0	0	0		2			0	2	3	0	1	3	1
1	2	1	3	7	3	2	2	1	0	15	0	0	0	0	0	0	0	0	0	0	4	4	0	0	5	1	1	3	0	2	6	0	1	3	1
1	1	1	5	3	1	4	2	1	0	20	13	0	0	0	0	0	0	0	0	0	0	0	0	0		2			0	2	9	0	1	3	1
1	2	1	2	7	1	2	2	1	0	1	0	0	0	0	0	0	0	0	6	0	0	0	0	0		2			1	2	10	0	1	3	1
1	2	1	3	7	1	2	2	1	0	23	0	0	0	0	0	0	0	0	0	0	0	0	0	0		2			0	2	89	1	1	2	0	1	0	0	0	0	0	0	0	0	0
1	2	1	3	7	2	2	2	1	0	5	2	0	0	0	0	0	0	0	1	1	0	0	0	0		2			1	2	43	1	1	1	0	1	0	0	0	0	0	0	0	0	0
1	1	1	4	7	2	2	2	1	0	0	0	0	0	0	0	0	0	0	0	0	0	0	0	0		2			1	2	13	0	1	3	1
1	2	1	4	7	1	2	2	1	0	0	0	0	1	0	1	0	0	0	1	1	0	0	0	0		2			0	2	19	1	1	3	0	1	0	0	0	0	0	0	0	0	0
1	1	1	6	7	3	2	2	1	0	18	0	0	0	0	0	0	0	0	3	0	0	0	0	0		2			0	2	38	1	1	2	0	1	0	0	0	0	0	0	0	0	0
1	1	1	5	7	1	2	2	1	0	0	4	0	0	0	0	0	0	0	0	0	0	0	0	0		2			1	2	12	0	1	8	1
3	2	1	3	5	3	4	1	4	0	0	0	0	0	0	0	0	0	0	0	0	1	1	0	0	3	1	1	2	1	2	23	1	1	1	0	1	0	0	0	0	0	0	0	0	0
1	2	1	4	2	1	2	2	1	0	5	0	0	1	1	0	8	0	0	1	0	1	0	1	0	5	1	1	2	1	2	31	1	1	3	0	1	0	0	0	0	0	0	0	0	0
1	1	2	4	7	1	2	2	1	3	0	0	0	0	0	0	0	0	0	0	0	0	0	0	0		2			1	2	64	1	1	1	0	1	0	0	0	0	0	0	0	0	0
3	1	1	4	7	1	2	2	1	0	25	0	0	0	0	0	0	0	0	1	0	0	0	0	0		2			1	2	2	0	1	3	1
1	2	1	1	7	1	4	1	1	0	0	3	0	0	0	0	0	0	0	0	0	1	0	1	0		2			1	2	25	1	1	1	0	1	0	0	0	0	1	0	1	0	1	3671	26	0
1	2	2	3	7	1	4	1	1	0	2	0	0	0	0	0	0	0	0	0	0	0	0	0	0		1	2	3	1	2	42	1	1	1	0	1	0	0	0	0	0	0	0	0	0
1	1	1	4	7	3	4	1	1	0	10	0	0	4	0	2	0	0	0	2	1	2	2	0	0	5	1	2	2	1	2	50	1	1	3	0	1	0	0	0	0	0	0	0	0	0
1	2	1	3	7	1	2	2	1	0	0	5	0	0	0	0	0	0	0	2	1	1	1	0	0	5	1	1	2	1	3	7	0	1	3	1
1	1	1	4	7	1	2	1	1	0	0	0	0	0	0	0	0	0	0	1	0	1	0	1	0		2			1	2	40	1	1	3	0	1	0	0	0	0	0	0	0	0	0
1	1	1	2	7	1	2	2	1	0	0	0	0	0	0	0	0	0	0	0	0	0	0	0	0		2			1	2	56	1	1	1	0	1	0	0	0	0	0	0	0	0	0
1	1	1	3	7	1	1	3	4	1	10	8	0	0	0	0	0	0	0	0	0	0	0	0	0		1	2	3	1	2	9	0	1	3	1
1	2	1	3	7	1	2	2	1	0	0	0	0	1	0	1	1	0	0	3	1	1	0	0	1		2			1	2	25	1	1	1	0	1	0	0	0	0	0	0	0	0	0
1	2	1	3	7	2	2	2	1	0	14	0	0	0	0	0	3	0	0	1	0	9	9	0	0	3	1	2	2	1	2	39	1	1	1	0	1	0	0	0	0	0	0	0	0	0
1	2	1	2	6	1	4	1	1	0	0	0	0	0	0	0	0	0	0	0	0	0	0	0	0		2			1	2	3	0	1	3	1
1	2	1	4	6	1	2	2	1	0	3	0	0	0	0	0	0	0	0	4	2	1	1	0	0	5	1	1	1	1	2	20	1	1	3	0	1	0	0	0	0	0	0	0	0	0
1	2	1	5	6	1	1	3	1	0	6	6	0	0	0	0	0	0	0	0	1	2	2	0	0	5	1	1	3	1	2	3	0	1	3	1
1	2	1	4	6	1	4	1	1	80	12	6	0	0	0	0	0	0	0	1	1	2	2	0	0	3	1	1	2	1	2	2	0	1	3	1
1	1	1	1	5	3	2	2	1	0	0	0	0	0	0	0	0	0	0	2	0	1	0	0	1	1	1	1	2	1	2	41	1	1	1	0	1	0	0	0	0	0	0	0	0	0
2	2	1	2	7	1	2	2	1	0	10	10	0	0	0	0	0	0	0	0	0	1	1	0	0	6	1	1	2	0	2	1		1	3	1
1	2	1	4	5	3	2	2	1	0	10	0	0	0	0	3	20	0	0	1	1	4	0	0	4	5	1	1	2	0	2	5	0	1	3	1
1	1	1	4	7	2	2	2	1	0	0	0	0	0	0	0	0	0	0	0	0	0	0	0	0		2			0	2	18	1	1	2	0	1	0	0	0	0	0	0	0	0	0
1	2	1	2	5	3	4	1	1	0	3	1	1	4	0	0	0	0	0	2	0	11	0	0	11	3	1	2	6	1	2	2	0	1	3	1
1	2	1	6	7	1	2	2	1	0	0	0	0	0	0	0	0	0	0	0	3	0	0	0	0		2			0	2	66	0	1	2	0	0
1	2	1	3	6	1	4	2	4	0	0	7	0	0	0	0	0	0	0	0	0	1	1	0	0	5	1	1	1	1	2	2	0	1	3	1
1	2	1	2	7	2	2	2	1	0	0	3	0	0	0	0	0	0	0	1	0	0	0	0	0		1	2	2	0	2	7	0	1	3	1
1	1	1	5	7	1	1	3	1	1	0	1	0	0	0	0	0	0	0	2	1	4	4	0	0	6	1	1	2	1	2	5	0	1	3	1
1	2	1	4	7	1	2	2	1	0	0	0	0	0	0	0	0	0	0	1	0	0	0	0	0		2			0	2	54	0	1	2	0	0
1	2	1	4	7	2	2	2	1	4	6	6	0	0	0	0	20	0	0	2	1	8	3	0	5	6	1	2	2	0	2	16	1	1	3	0	1	0	0	0	0	0	0	0	0	0
1	2	1	4	7	1	4	2	1	7	3	8	0	0	0	0	0	0	0	1	0	0	0	0	0		2			1	2	12	0	1	3	1
1	2	1	3	6	2	2	2	4	0	2	10	0	0	0	2	0	0	0	2	1	3	3	0	0	5	1	1	2	1	2	29	1	1	1	0	1	0	0	0	0	0	0	0	0	0
1	1	1	4	6	1	1	3	1	0	4	0	0	0	0	0	0	0	0	1	0	0	0	0	0		2			0	2	10	0	1	3	1
1	2	2	6	7	1	1	3	1	0	0	4	0	0	0	0	0	0	0	1	0	0	0	0	0		2			0	2	7	0	1	3	1
1	2	2	5	5	2	2	2	1	1	0	20	0	0	0	0	2	0	0	1	0	3	3	0	0	3	1	1	2	0	2	7	0	2	3	1
1	2	1	3	3	1	4	1	1	3	6	0	0	0	0	0	15	0	0	1	1	8	0	0	8	6	1	1	6	1	2	29	1	1	3	0	1	0	0	0	0	0	0	0	0	0
1	2	1	3	6	1	1	3	1	0	0	40	0	0	0	0	0	0	0	0	1	2	2	0	0		2			0	2	3	0	1	3	1
1	2	1	4	7	2	2	2	1	0	1	0	0	0	0	0	3	0	0	2	0	0	0	0	0		2			1	2	5	0	1	3	1
1	2	1	2	4	3	2	2	1	2	2	0	0	0	0	0	0	0	0	2	1	2	2	0	0	5	1	1	2	0	2	23	1	1	2	0	1	0	0	0	0	0	0	0	0	0
1	2	2	4	6	1	2	2	1	0	0	0	0	0	0	0	0	0	0	1	0	0	0	0	0		2			0	2	1	0	3	3	1
1	2	1	3	7	1	2	2	1	0	0	0	0	0	0	0	0	0	0	0	0	0	0	0	0		2			1	2	13	0	1	3	1
1	2	1	4	7	1	4	2	1	0	0	0	0	0	0	0	0	0	0	1	0	0	0	0	0		2			1	2	0		1	3	1
1	2	1	5	7	1	2	2	1	0	2	10	0	0	0	0	0	0	0	1	0	0	0	0	0		2			0	2	11	0	1	3	1
1	1	2	4	4	1	4	1	1	1	15	6	0	2	0	0	4	0	0	5	1	2	0	0	2	3	1	1	2	0	2	27	1	2	2	0	1	0	0	0	0	0	0	0	0	0
1	2	1	3	7	1	2	2	1	1	6	0	0	0	0	1	0	0	0	0	1	1	1	0	0	4	1	2	2	1	2	24	1	1	3	0	1	0	0	0	0	0	0	0	0	0
1	2	2	5	7	2	2	2	1	0	8	6	0	0	0	0	0	0	0	1	1	2	2	0	0	6	1	1	2	0	2	23	1	2	2	0	1	1	0	1	0	0	0	0	0	1	1466	24	5
1	1	1	3	7	1	1	3	1	0	1	0	0	0	0	0	0	0	0	2	0	0	0	0	0		2			1	2	16	1	1	3	0	1	0	0	0	0	0	0	0	0	0
1	2	1	3	7	2	2	2	1	0	1	2	0	0	0	0	0	0	0	0	0	0	0	0	0		2			1	2	0		1	3	1
1	2	1	3	4	2	2	2	5	0	0	0	0	1	0	0	10	0	0	2	0	4	1	0	3	6	1	2	2	1	2	11	0	1	3	1
2	2	1	4	7	1	2	2	4	4	0	10	0	0	0	0	0	0	0	2	0	0	0	0	0		2			0	2	29	1	1	2	0	1	0	0	0	0	0	0	0	0	0
1	1	1	2	7	3	4	1	1	0	3	0	0	0	0	0	0	0	0	0	0	0	0	0	0		2			0	2	25	1	1	2	0	1	0	0	0	0	0	0	0	0	0
1	1	1	6	7	1	2	2	1	0	0	6	0	2	0	0	0	0	0	0	1	1	0	0	1	3	1	1	3	0	2	3	0	1	3	1
1	2	1	2	7	2	2	2	1	0	0	0	0	0	0	0	0	0	0	0	0	0	0	0	0		1	2	3	0	3	0		1	3	1
1	2	1	2	6	1	2	2	4	0	0	0	0	0	0	0	0	0	0	0	0	2	2	0	0	5	1	1	3	0	2	24	1	1	2	0	1	0	0	0	0	0	0	0	0	0
1	1	2	3	7	1	1	3	1	0	20	18	0	0	0	0	0	0	0	1	0	0	0	0	0		2			0	2	49	1	1	2	0	1	0	0	0	0	0	0	0	0	0
1	2	1	2	2	1	4	1	1	0	0	0	0	0	0	0	0	0	0	0	0	0	0	0	0		2			1	2	2	0	1	3	1
1	2	1	5	6	1	1	3	1	0	0	15	0	0	0	0	0	0	0	0	0	4	0	0	4	5	1	1	1	0	2	63	1	1	2	0	1	0	0	1	0	1	0	0	0	1	1800	64	1	0
1	2	1	5	3	1	4	1	1	1	20	0	2	2	0	10	10	0	0	2	2	0	0	0	0		1	1	6	1	2	31	1	1	3	0	1	0	0	0	0	0	0	0	0	0
1	3	1	3	7	1	2	2	4	0	0	2	0	0	0	0	0	0	0	1	1	0	0	0	0		2			1	2	5	0	1	3	1
1	2	1	4	7	2	2	2	4	0	12	0	0	0	0	0	0	0	0	0	1	4	4	0	0	5	1	2	3	0	2	32	1	1	2	0	1	0	0	0	0	0	0	0	0	0
1	2	2	4	7	1	2	2	1	0	0	2	0	1	0	0	0	0	0	0	0	3	3	0	0	3	1	1	2	0	2	29	1	1	3	0	1	0	0	0	0	0	0	0	0	0
1	2	1	4	3	1	2	2	1	9	20	2	3	2	2	5	20	0	0	2	0	0	0	0	0		2			0	2	39	1	1	2	0	1	0	0	0	0	0	0	0	0	0
1	2	1	3	7	1	2	2	1	0	5	0	0	0	0	0	0	0	0	1	0	0	0	0	0		2			0	2	30	1	1	2	0	1	0	0	0	0	0	0	0	0	0
1	2	1	4	2	1	1	3	4	0	3	0	0	0	0	0	0	0	0	0	0	0	0	0	0		1	1	2	1	2	29	1	1	3	0	1	0	0	0	0	0	0	0	0	0
1	2	1	2	7	3	2	2	1	0	6	0	0	0	0	0	0	0	0	0	0	7	0	0	0		2			1	2	8	0	1	3	1
1	2	2	5	7	1	2	2	1	0	7	0	0	0	0	0	0	0	0	2	0	2	2	0	0	5	1	1	3	1	2	3	0	2	3	1
1	2	1	3	7	1	1	3	1	0	8	0	0	0	0	0	0	0	0	2	0	8	8	0	0	5	1	2	2	0	2	17	1	1	2	0	1	0	0	0	0	0	0	0	0	0
1	2	1	5	7	1	2	2	1	0	2	2	0	0	0	0	0	0	0	1	0	0	0	0	0		1	1	1	1	2	11	0	1	3	1
1	2	1	3	7	1	2	1	1	0	0	0	0	0	0	0	0	0	0	1	0	4	4	0	0	3	1	1	3	1	2	9	0	1	3	1
1	2	1	5	2	1	4	1	1	1	16	0	0	1	0	0	5	0	0	2	1	7	6	1	0	3	1	1	2	0	2	15	0	1	3	0	0
1	2	2	2	7	1	1	1	1	0	0	0	0	0	0	0	0	0	0	0	0	0	0	0	0		1	1	3	0	2	49	1	1	2	0	1	0	1	0	0	0	1	0	1	1	820	49	1	1
1	2	1	3	7	2	2	2	1	0	0	0	0	0	0	0	0	0	0	0	0	1	1	0	0	3	1	2	2	1	2	0		1	3	1
1	2	1	5	5	2	2	2	1	0	5	9	0	0	0	0	0	0	0	1	0	0	0	0	0		2			1	2	37	1	1	1	0	1	0	0	0	0	0	0	0	0	0
1	1	1	4	7	1	1	3	1	0	10	0	0	0	0	0	0	0	0	1	0	0	0	0	0		2			1	2	7	0	1	3	1
2	2	1	2	7	1	1	3	1	0	0	10	0	0	0	0	0	0	0	1	0	0	0	0	0		2			1	2	29	1	1	1	0	1	0	0	0	0	0	0	0	0	0
1	2	1	4	5	3	2	2	1	0	0	0	0	1	0	2	0	0	0	0	0	0	0	0	0		2			0	2	72	1	1	2	0	1	0	0	0	0	0	0	0	0	0
1	2	1	3	7	1	1	3	1	0	0	4	0	0	0	0	0	0	0	0	0	0	0	0	0		1	1	3	1	2	16	1	1	3	0	1	0	0	0	0	0	0	0	0	0
1	2	1	1	5	3	2	2	4	0	5	0	3	1	0	0	0	0	0	1	1	0	0	0	0		2			1	2	62	1	1	1	0	1	0	0	0	0	0	0	0	0	0
1	1	2	3	7	1	1	1	1	0	2	0	0	0	0	0	0	0	0	0	0	0	0	0	0		2			1	2	3	0	2	3	1
1	2	1	2	7	2	4	1	1	3	7	0	0	0	0	0	0	0	0	1	0	4	0	0	4	5	1	1	2	0	2	7	0	1	3	1
1	2	1	3	7	1	1	3	1	0	7	4	0	3	0	0	0	0	0	1	1	3	0	0	3	3	1	2	3	1	2	23	1	1	3	0	1	0	0	0	0	0	0	0	0	0
1	2	1	3	7	3	4	1	1	3	15	14	0	0	0	1	14	0	0	3	0	4	0	0	0		2			0	2	34	1	1	2	0	1	0	0	0	0	0	0	0	0	0
1	2	2	4	7	2	2	2	1	1	0	10	1	6	0	10	41	0	0	1	0	1	0	0	1	5	1	1	2	0	2	19	1	2	2	0	1	0	0	0	0	0	0	0	0	0
1	1	1	4	7	1	2	2	1	4	4	5	0	0	0	0	0	0	0	1	1	0	0	0	0		2			1	2	7	0	1	3	1
1	2	1	3	7	1	2	2	4	0	6	4	0	0	0	0	0	0	0	0	3	2	2	0	0	6	1	1	3	0	2	14	0	1	3	1
1	1	1	3	7	1	1	3	1	0	32	28	0	0	0	0	0	0	0	2	1	1	0	1	0		2			1	2	11	0	1	3	1
1	2	1	5	7	1	2	2	1	0	15	4	0	0	0	0	0	0	0	0	0	0	0	0	0		2			0	2	38	1	1	2	0	1	0	0	1	0	0	0	0	0	0
1	2	1	3	3	1	2	2	1	0	7	0	1	1	1	15	5	6	0	2	1	3	0	0	3	5	1	1	2	1	2	18	1	1	3	0	1	0	1	0	0	0	1	0	0	1	1386	19	1	0
1	3	1	4	6	1	4	1	1	0	7	0	0	0	0	0	0	0	0	1	0	0	0	0	0		1	2	3	1	2	14	0	1	3	1
1	1	1	4	7	1	1	3	1	0	0	0	0	0	0	0	0	0	0	0	0	1	1	0	0	3	1	1	1	1	2	11	0	1	3	1
1	2	1	3	7	2	4	1	1	0	10	0	2	2	0	0	10	0	0	1	1	7	0	0	7	5	1	1	2	0	2	40	1	1	2	0	1	0	0	0	0	0	0	0	0	0
1	2	1	3	7	1	2	2	1	0	6	6	0	0	0	0	0	0	0	2	4	1	1	0	0	5	1	2	6	1	2	6	0	1	3	1
3	1	2	3	7	1	2	2	1	0	3	0	0	0	0	0	0	0	0	1	0	0	0	0	0		2			1	2	11	0	1	3	1
1	2	1	4	7	3	2	2	1	0	0	0	0	0	0	0	0	0	0	0	0	1	1	0	0	3	1	1	6	1	3	12	0	1	3	1
1	2	1	5	7	1	2	2	1	0	0	0	0	0	0	0	0	0	0	0	0	0	0	0	0		1	2	3	1	2	11	0	1	3	1
1	1	2	4	7	2	2	2	1	0	10	4	0	0	0	0	0	0	0	0	1	1	1	0	0	5	1	2	3	0	2	1	0	2	3	1
1	2	2	3	7	1	2	2	1	4	40	40	0	0	0	0	0	0	0	2	1	3	3	0	0		2			0	2	5	0	2	3	1
1	2	1	2	6	1	4	1	4	0	5	8	0	2	0	0	2	5	0	0	0	0	0	0	0		2			1	3	13	0	1	3	1
1	2	1	5	4	3	2	2	1	9	20	5	0	1	0	0	50	0	0	4	1	0	0	0	0		2			1	2	16	1	1	3	0	1	0	0	0	0	0	0	0	0	0
1	2	1	4	7	3	4	1	1	0	15	0	0	2	0	2	50	0	0	3	0	10	0	0	0		2			1	2	9	0	1	7	1
1	2	1	4	7	1	4	1	1	0	0	0	0	0	0	0	0	0	0	1	0	0	0	0	0		2			1	2	21	1	1	1	0	1	0	1	1	0	0	0	0	0	1	520	22	1	0
1	1	1	3	6	1	4	2	1	0	0	0	0	0	0	0	0	0	0	0	1	0	0	0	0		2			1	2	6	0	1	3	1
1	1	1	4	7	1	1	3	1	0	5	3	0	0	0	0	0	0	0	1	0	0	0	0	0		2			1	2	21	1	1	3	0	1	0	0	0	0	0	0	0	0	0
1	2	2	5	7	1	1	3	1	0	5	8	0	0	0	0	0	0	0	0	0	0	0	0	0		2			0	2	80	1	1	4	0	1	0	0	0	0	0	0	0	0	0
1	2	1	2	6	1	4	2	1	0	0	0	0	0	0	0	0	0	0	2	1	0	0	0	0		2			0	2	6	0	1	3	1
1	1	1	2	2	1	4	1	1	0	2	1	0	0	0	0	0	0	0	0	0	1	1	0	0	3	1	2	6	0	2	6	0	1	3	1
1	1	1	3	7	1	1	3	1	0	0	0	0	0	0	0	0	0	0	1	0	0	0	0	0		2			1	2	9	0	1	3	1
1	2	1	1	2	1	4	1	4	0	9	10	0	0	0	0	0	0	0	0	0	0	0	0	0		2			1	2	8	0	1	3	1
1	1	1	4	7	1	2	2	1	0	0	0	0	0	0	0	0	0	0	1	0	1	0	1	0		2			1	2	17	1	1	3	0	1	0	0	0	0	0	0	0	0	0
1	2	1	3	2	1	2	2	1	0	0	0	0	0	0	0	0	0	0	0	0	0	0	0	0		2			1	2	30	1	1	1	0	1	0	0	0	0	0	0	0	0	0
1	2	1	5	7	1	2	2	1	0	0	3	0	0	0	0	0	0	0	1	1	1	1	0	0	3	1	1	2	1	2	29	1	1	1	0	1	0	0	0	0	0	0	0	0	0
1	1	1	3	5	3	4	1	1	0	0	0	0	0	0	0	0	0	0	1	0	0	0	0	0		1	2	2	1	2	3	0	1	3	1
1	2	1	3	7	3	2	2	1	0	4	0	0	0	0	0	0	0	0	2	1	1	1	0	0	5	1	1	3	1	2	7	0	1	3	1
1	2	1	2	7	3	4	1	1	0	0	0	0	0	0	0	0	0	0	0	0	0	0	0	0		2			0	2	19	1	1	2	0	1	0	0	0	0	0	0	0	0	0
1	2	1	5	7	2	2	2	1	0	0	15	0	0	0	0	0	0	0	5	0	0	0	0	0		1	1	2	0	2	2	0	1	3	1
1	2	2	4	7	2	2	2	1	0	4	2	5	3	1	30	5	0	0	7	2	9	9	0	0	6	1	1	2	1	2	28	1	2	1	0	1	0	0	0	0	0	0	0	0	0
1	2	1	6	7	2	2	2	1	0	5	0	0	1	0	0	0	0	0	2	0	3	0	0	3	3	1	3	2	1	2	17	1	1	3	0	1	0	0	0	0	0	0	0	0	0
1	2	1	3	3	1	1	3	1	0	0	12	0	1	0	0	2	0	0	0	1	2	2	0	0	5	1	2	3	1	2	16	1	1	3	0	1	0	0	0	0	0	0	0	0	0
1	2	1	3	3	1	1	3	1	0	0	12	0	1	0	0	2	0	0	0	1	2	2	0	0	5	1	2	3	1	2	10	0	1	3	1
1	2	1	4	7	1	1	3	1	0	3	4	0	0	0	0	0	0	0	0	0	0	0	0	0		2			1	2	43	1	1	1	0	1	0	0	0	0	0	0	0	0	0
1	2	1	2	2	1	2	2	1	0	0	0	0	0	0	0	0	0	0	0	0	0	0	0	0		2			1	2	3	0	1	3	1
1	2	1	2	2	1	2	1	4	0	0	0	0	0	0	0	0	0	0	0	0	0	0	0	0		2			1	2	2	0	1	3	1
1	2	1	5	7	1	2	2	1	0	4	10	0	0	0	3	0	5	0	2	1	10	10	0	0	3	1	2	2	1	2	16	1	1	3	0	1	0	0	0	0	0	0	0	0	0
1	2	1	4	7	1	2	2	4	0	0	17	0	0	0	0	0	0	0	0	0	0	0	0	0		2			1	2	7	0	1	3	1
2	2	1	2	6	1	1	2	1	0	0	0	0	0	0	0	0	0	0	0	0	0	0	0	0		2			0	2	0		1	3	1
3	2	1	2	2	1	4	1	1	0	0	0	0	0	0	0	0	0	0	0	0	0	0	0	0		2			1	3	8	0	1	3	1
1	1	1	2	7	1	2	2	1	0	0	0	0	0	0	0	2	0	0	2	0	2	2	0	0	3	1	1	2	1	2	10	0	1	3	1
1	2	1	4	7	1	2	2	1	0	2	2	0	0	0	0	0	0	0	2	0	1	1	0	0	3	1	1	2	0	2	4	0	1	3	1
1	2	2	7	5	3	2	2	1	0	10	3	2	1	0	5	0	0	0	4	1	2	2	0	0	5	1	2	3	0	2	0	0	2	3	1
1	2	1	4	7	2	4	1	1	0	10	0	0	0	0	0	0	0	0	1	0	3	0	1	2	5	1	2	3	1	2	8	0	1	3	1
1	2	1	4	7	3	2	2	1	0	2	3	0	0	0	0	0	0	0	1	1	0	0	0	0		2			1	3	14	0	1	3	1
1	2	2	4	6	1	2	2	4	0	0	0	0	0	0	0	0	0	0	1	1	1	0	1	0	5	1	1	2	1	2	16	1	1	3	0	1	0	0	0	0	0	0	0	0	0
1	1	1	5	7	2	2	2	1	0	8	2	0	0	0	0	0	0	0	0	0	0	0	0	0		2			1	2	21	0	1	3	0	0
1	2	1	3	5	3	2	2	1	0	7	3	0	1	0	5	10	0	0	2	0	3	3	0	0	5	1	1	2	1	3	16	1	1	7	0	1	0	0	0	0	0	0	0	0	0
1	1	2	4	7	1	2	2	1	0	0	0	0	0	0	0	0	0	0	0	0	0	0	0	0		2			1	2	18	1	1	3	0	1	0	0	0	0	0	0	0	0	0
1	2	1	3	4	3	4	1	4	2	5	0	1	1	1	2	10	0	0	2	2	4	0	0	4	5	1	2	2	1	2	11	0	1	3	1
1	2	2	5	7	1	1	2	1	0	1	0	0	0	0	0	0	0	0	1	0	1	0	1	0		2			1	2	16	1	2	3	0	1	0	0	0	0	0	0	0	0	0
1	2	1	3	7	1	4	2	1	0	14	4	0	0	0	0	0	0	0	1	1	0	0	0	0		2			1	2	14	0	1	3	1
1	2	2	3	7	1	4	1	1	0	0	0	0	0	0	0	0	0	0	1	0	0	0	0	0		2			1	2	26	1	1	1	0	1	0	0	0	0	0	0	0	0	0
1	2	1	4	7	1	1	3	1	0	0	0	0	0	0	0	0	0	0	1	0	0	0	0	0		2			1	2	11	0	1	3	1
1	2	2	4	3	1	2	2	1	0	0	0	0	0	0	0	0	0	0	0	0	1	0	1	0	5	1	1	2	1	2	9	0	2	3	1
1	2	1	2	7	1	1	3	4	0	0	21	0	0	0	0	0	0	0	1	0	0	0	0	0		2			1	2	4	0	1	3	1
1	2	2	5	7	1	1	3	1	0	0	6	0	0	0	0	4	0	0	3	1	12	12	0	0	5	1	1	2	1	2	22	1	1	3	0	1	0	0	0	0	0	0	0	0	0
1	2	1	5	7	1	2	1	1	0	10	12	2	1	0	0	0	0	0	2	0	0	0	0	0		2			1	2	4	0	1	3	1
1	2	1	4	7	1	1	3	1	0	0	0	0	0	0	0	0	0	0	0	1	0	0	0	0		2			0	2	15	1	1	8	0	1	0	0	0	0	0	0	0	0	0
1	2	2	4	7	1	4	1	1	0	5	0	0	1	0	0	0	0	0	0	0	1	1	0	0	3	1	1	2	1	2	30	1	2	1	0	1	0	0	0	0	0	0	0	0	0
1	2	1	5	7	1	1	3	1	0	3	0	0	0	0	0	0	0	0	2	0	2	2	0	0	5	1	2	3	1	2	22	1	1	3	0	1	0	0	0	0	0	0	0	0	0
1	2	1	5	7	1	2	2	1	0	0	0	0	0	0	0	0	0	0	1	1	2	1	0	1	5	1	1	2	1	2	14	0	1	8	1
3	1	1	3	7	1	4	1	1	0	0	0	0	0	0	0	0	0	0	0	0	0	0	0	0		2			1	2	14	0	1	3	1
1	1	1	3	6	1	2	2	4	20	15	13	0	0	0	0	0	0	0	2	0	1	1	0	0	6	1	1	2	0	2	27	1	1	2	0	1	0	0	1	0	0	0	0	0	0
1	2	1	5	5	3	2	2	1	2	3	4	0	0	0	1	0	0	0	0	0	9	9	0	0	5	1	1	4	1	2	15	1	1	3	0	1	0	0	0	0	0	0	0	0	0
1	3	1	3	7	1	4	1	1	0	0	0	0	0	0	0	0	0	0	0	0	0	0	0	0		2			1	2	19	0	1	1	0	0
1	1	1	4	7	1	2	2	1	0	0	0	0	0	0	0	0	0	0	1	0	0	0	0	0		2			1	3	17	1	1	3	0	1	0	0	0	0	0	0	0	0	0
1	2	1	4	7	1	2	2	1	1	2	3	0	1	0	4	12	1	0	3	1	9	9	0	0	5	1	1	6	1	2	18	1	1	3	0	1	0	0	0	0	0	0	0	0	0
1	2	1	4	7	3	2	2	1	0	3	0	0	0	0	0	0	0	0	2	0	2	2	0	0	5	1	2	2	1	2	5	0	1	3	1
1	2	1	1	7	1	4	1	1	0	10	7	0	0	0	0	0	0	0	1	1	4	4	0	0	3	1	1	3	1	2	8	0	1	3	1
1	2	2	1	7	3	4	2	4	0	8	2	0	0	0	0	0	0	0	0	0	0	0	0	0		2			1	2	7	0	3	3	1
1	2	1	7	3	1	1	3	1	0	0	0	0	0	0	0	0	0	0	2	0	0	0	0	0		2			1	2	15	1	1	3	0	1	0	0	0	0	0	0	0	0	0
1	1	1	3	7	1	1	3	1	0	0	0	0	0	0	0	0	0	0	1	0	0	0	0	0		2			0	2	12	0	1	3	1
1	2	1	3	7	1	2	2	1	0	5	0	1	1	0	0	0	0	0	0	1	4	4	0	0	3	1	1	3	0	2	70	1	1	2	0	1	0	0	0	0	0	0	0	0	0
1	2	1	3	7	1	1	3	4	1	2	0	2	2	0	0	0	0	0	2	1	0	0	0	0		2			1	2	7	0	1	3	1
1	2	1	4	5	3	4	1	1	0	0	2	0	0	0	0	0	0	0	0	0	2	0	2	0		2			1	2	9	0	1	3	1
1	2	2	5	7	2	2	2	1	0	25	0	0	2	0	0	30	0	0	2	0	3	0	0	0		2			1	2	9	0	1	3	1
1	1	1	5	7	1	2	2	1	0	0	0	0	0	0	0	0	0	0	0	0	0	0	0	0		2			1	2	7	0	1	3	1
1	2	2	5	7	1	4	1	1	0	1	2	0	1	0	0	0	0	0	1	1	2	0	0	2	5	1	3	2	0	2	14	0	2	2	1
1	1	1	4	7	2	2	2	1	0	0	2	0	0	0	0	0	0	0	0	0	0	0	0	0		2			1	2	2	0	1	3	1
1	2	2	3	7	1	2	2	1	0	2	0	0	0	0	1	0	0	0	1	1	1	0	1	0	3	1	3	2	1	2	1	0	2	3	1
1	2	2	4	7	1	2	2	1	0	10	10	0	1	0	0	0	0	0	3	2	3	0	1	2	5	1	3	2	0	2	5	0	2	3	1
1	2	1	2	6	1	4	1	1	0	0	0	0	0	0	0	0	0	0	2	1	0	0	0	0		2			1	2	6	0	1	3	1
1	2	1	4	7	1	2	1	1	0	0	0	0	1	0	10	0	0	0	4	0	7	7	0	0	5	1	1	2	1	2	18	1	1	3	0	1	0	0	0	0	0	0	0	0	0
1	2	1	3	7	1	2	2	1	0	4	1	0	0	0	0	0	0	0	0	0	0	0	0	0		2			1	2	4	0	1	3	1
1	2	1	4	6	1	2	1	1	0	0	7	0	0	0	0	0	0	0	0	0	0	0	0	0		1	2	3	0	2	12	0	1	3	1
1	2	1	4	7	1	1	3	1	0	0	4	0	0	0	0	0	0	0	2	0	2	2	0	0	5	1	1	2	1	2	7	0	1	3	1
1	2	1	2	6	3	4	1	1	0	10	30	0	0	0	0	0	0	0	0	0	1	1	0	0	3	1	2	2	1	2	1	0	1	3	1
1	2	1	4	5	3	2	2	1	0	7	0	0	0	0	0	0	0	0	1	1	2	0	0	2		2			0	2	2	0	2	3	1
1	2	2	6	7	3	2	2	1	0	0	0	0	0	0	5	0	0	0	3	2	5	4	0	1	6	1	2	3	0	2	2	0	3	3	1
1	2	1	3	7	1	1	3	1	0	0	3	0	0	0	0	0	0	0	1	0	2	2	0	0	5	1	1	2	1	2	17	1	1	3	0	1	0	0	0	0	0	0	0	0	0
3	2	1	4	6	2	2	2	5	0	30	2	0	0	0	0	0	0	0	4	1	4	4	0	0	5	1	2	3	1	2	11	0	1	3	1
1	2	1	3	6	2	4	1	5	0	20	0	0	0	0	0	0	0	0	1	0	2	0	0	2		2			1	2	6	0	1	3	1
1	2	1	3	7	1	2	2	1	0	0	0	0	0	0	0	0	0	0	0	1	0	0	0	0		2			0	2	3	0	1	3	1
1	2	2	3	7	1	2	2	1	0	7	0	0	0	0	0	0	0	0	4	0	2	2	0	0	5	1	1	2	1	2	5	0	2	3	1
1	2	2	3	5	3	2	2	5	0	3	0	0	2	0	0	0	0	0	1	0	6	3	0	3	5	1	3	5	1	2	2	0	2	3	1
1	2	2	4	7	1	1	3	1	0	3	0	0	0	0	0	0	0	0	1	2	0	0	0	0		1	3	2	0	2	9	0	1	8	1
1	2	1	4	5	2	2	2	1	0	34	2	0	3	0	1	0	0	20	2	0	0	0	0	0		1	1	2	1	2	2	0	1	3	1
1	2	1	2	4	3	2	2	5	2	5	4	0	0	0	0	20	1	0	6	1	10	0	0	10	4	1	2	3	1	2	8	0	1	3	1
1	2	1	4	7	3	2	2	1	0	20	1	0	1	0	0	0	0	0	2	0	0	0	0	0		2			1	2	6	0	1	3	1
1	2	1	5	5	3	2	2	4	8	11	1	0	4	0	0	0	0	0	3	0	3	1	0	2	3	1	2	2	1	2	3	0	1	3	1
1	2	1	3	7	1	4	1	4	0	0	0	0	0	0	0	0	0	0	0	0	0	0	0	0		2			0	2	9	0	1	3	1
1	1	1	4	7	3	2	1	1	0	0	0	0	0	0	0	0	0	0	0	0	0	0	0	0		2			1	2	10	0	1	3	1
1	2	1	4	7	3	2	2	1	0	0	7	0	0	0	0	0	0	0	0	0	0	0	0	0		2			1	2	41	1	1	3	0	1	0	0	0	0	0	0	0	0	0
1	1	1	4	7	3	2	1	1	0	0	0	0	0	0	0	0	0	0	0	0	0	0	0	0		2			1	2	6	0	1	3	1
1	2	2	5	7	1	2	2	1	0	0	0	0	0	0	0	0	0	0	3	1	1	1	0	0	3	1	1	3	1	2	7	0	2	3	1
1	1	1	5	7	1	2	2	1	0	0	0	0	0	0	0	0	0	0	1	0	0	0	0	0		2			0	2	19	1	1	3	0	1	0	0	0	0	0	0	0	0	0
1	2	1	3	7	2	2	2	1	0	6	10	0	0	0	0	0	0	0	1	1	0	0	0	0		2			1	2	11	0	1	3	1
1	2	1	4	7	1	2	2	1	0	4	2	1	1	0	1	0	0	0	1	0	0	0	0	0		2			1	2	11	0	1	3	1
1	2	1	2	6	1	4	1	5	0	2	3	0	0	0	0	0	0	0	1	0	2	2	0	0	5	1	1	2	1	2	6	0	1	3	1
1	2	1	4	5	3	2	1	4	16	10	4	0	3	0	0	0	0	0	0	0	7	6	0	1	5	1	2	2	1	2	20	1	1	3	0	1	0	0	0	0	0	0	0	0	0
1	3	1	3	7	1	4	1	1	0	0	4	0	0	0	0	0	0	0	0	0	0	0	0	0		2			1	2	7	0	1	3	1
1	1	1	4	7	1	2	2	1	0	0	0	0	0	0	0	0	0	0	0	0	0	0	0	0		2			1	2	20	1	1	3	0	1	0	0	0	0	0	0	0	0	0
1	1	1	4	7	1	2	2	1	0	0	0	0	0	0	0	0	0	0	0	0	0	0	0	0		2			1	2	16	1	1	3	0	1	0	0	0	0	0	0	0	0	0
1	2	1	2	7	1	2	2	1	0	15	15	0	0	0	0	0	0	0	1	0	0	0	0	0		2			1	2	4	0	1	3	1
1	2	1	4	3	1	4	2	2	0	5	1	2	5	1	8	10	4	0	1	0	2	0	2	0	5	1	1	2	0	2	10	0	1	3	1
1	1	1	3	7	1	1	3	1	0	0	0	0	0	0	0	0	0	0	1	1	0	0	0	0		2			1	2	25	1	1	3	0	1	0	0	0	0	0	0	0	0	0
1	1	1	3	7	3	1	3	1	0	0	5	0	0	0	0	0	0	0	1	0	2	2	0	0	3	1	2	2	0	2	11	0	1	3	1
1	2	1	4	7	1	2	2	4	0	4	10	0	0	0	0	0	0	0	1	0	0	0	0	0		2			0	2	4	0	1	3	1
1	2	1	3	7	1	2	2	1	0	7	3	0	1	0	0	0	0	0	2	0	0	0	0	0		2			0	2	12	0	1	3	1
1	2	1	4	7	1	2	2	1	0	10	0	0	0	0	8	0	0	0	4	1	2	2	0	0	5	1	2	4	1	2	28	1	1	3	0	1	0	0	0	0	0	0	0	0	0
1	1	1	5	7	1	2	2	1	0	5	0	0	0	0	0	0	0	0	0	0	0	0	0	0		2			1	2	10	0	1	3	1
1	2	2	3	7	1	2	2	1	0	0	0	0	0	0	0	0	0	0	0	3	0	0	0	0		2			1	2	15	1	1	3	0	1	0	0	0	0	0	0	0	0	0
1	2	2	3	7	1	2	2	1	0	0	0	0	0	0	0	0	0	0	0	3	0	0	0	0		2			1	2	5	0	1	3	1
1	1	1	6	7	1	2	2	1	0	0	0	0	0	0	0	0	0	0	0	0	0	0	0	0		2			1	3	17	0	1	3	0	0
1	2	1	3	7	1	1	3	1	10	2	3	0	0	0	0	0	0	0	0	0	0	0	0	0		2			1	2	2	0	1	3	1
1	2	1	3	7	1	2	2	1	0	0	0	0	0	0	0	0	0	0	0	0	0	0	0	0		2			1	2	12	0	1	3	1
1	2	1	5	7	3	2	2	1	0	0	15	0	3	0	5	0	0	0	3	1	2	2	0	0	6	1	1	3	1	2	2	0	1	3	1
1	2	1	2	6	1	4	1	4	0	10	15	0	0	0	0	0	0	0	0	0	1	1	0	0	3	1	1	2	0	2	4	0	1	3	1
1	2	1	2	7	1	2	2	1	0	1	3	0	0	0	0	0	0	0	1	1	0	0	0	0		2			0	2	2	0	1	3	1
1	2	2	4	7	1	2	2	1	2	1	2	0	0	0	2	2	0	0	3	1	0	0	0	0		1	2	2	1	2	22	0	3	1	0	0
1	1	1	4	7	1	2	2	1	0	11	0	0	0	0	0	0	0	0	0	0	0	0	0	0		2			1	2	34	1	1	1	0	1	0	0	0	0	0	0	0	0	0
1	2	1	4	7	2	4	1	1	0	12	0	0	2	0	0	0	0	0	3	0	0	0	0	0		2			1	2	15	1	1	3	0	1	0	0	0	0	0	0	0	0	0
1	2	1	4	7	1	4	1	1	0	20	6	10	1	0	0	100	0	0	2	0	10	0	0	10	5	1	2	2	1	2	10	0	1	3	1
1	2	1	3	6	1	4	1	1	0	3	0	0	0	0	0	0	0	0	1	4	0	0	0	0		2			1	2	3	0	1	3	1
1	2	1	4	6	1	2	2	4	0	1	5	0	0	0	0	0	0	0	0	0	9	0	0	9		2			0	2	8	0	1	3	1
1	2	1	2	2	1	2	2	1	0	6	0	0	0	0	0	0	0	0	1	0	0	0	0	0		2			1	2	10	0	1	3	1
1	2	1	2	7	3	2	2	1	0	6	0	0	0	0	0	0	0	0	0	0	7	0	0	0		2			1	3	8	0	1	3	1
1	2	1	3	2	1	2	2	4	0	4	2	1	1	0	4	0	8	0	2	0	4	0	1	3	3	1	2	2	1	2	11	0	1	3	1
1	2	1	4	7	1	2	2	1	0	13	0	0	0	0	0	0	0	0	0	0	0	0	0	0		2			1	2	7	0	1	3	1
1	2	1	3	7	2	4	1	1	0	8	12	0	0	0	0	0	0	0	1	0	5	0	0	5	6	1	1	2	0	2	1	0	1	3	1
1	1	1	4	6	1	4	1	1	0	0	0	0	0	0	0	0	0	0	0	0	0	0	0	0		2			1	2	8	0	1	3	1
1	2	1	2	7	1	2	2	4	0	0	0	0	0	0	0	0	0	0	0	0	0	0	0	0		2			0	2	30	1	1	2	0	1	0	0	0	0	0	0	0	0	0
1	2	1	3	7	3	2	2	1	0	0	0	0	0	0	0	0	0	0	1	1	1	1	0	0	3	1	1	3	0	2	33	1	1	2	0	1	0	0	0	0	0	0	0	0	0
1	2	1	3	7	2	2	2	1	5	8	0	0	2	0	1	2	0	0	1	0	1	0	0	0		2			1	2	29	1	1	1	0	1	0	0	0	0	0	0	0	0	0
1	2	1	4	5	3	4	1	5	8	12	10	5	20	1	20	40	0	0	3	0	20	0	0	20	5	1	2	2	1	2	16	1	1	3	0	1	0	0	0	0	0	0	0	0	0
1	1	1	4	7	1	4	1	1	0	16	0	0	0	0	0	0	0	0	3	0	3	0	1	2	5	1	3	2	1	2	16	1	1	3	0	1	0	0	0	0	0	0	0	0	0
1	2	1	5	7	1	2	2	1	1	0	0	0	0	0	0	0	0	0	0	0	1	0	0	1	3	1	3	2	0	2	31	0	1	2	0	0
1	1	1	3	7	1	1	3	1	0	0	8	0	0	0	0	0	0	0	0	0	0	0	0	0		2			1	2	20	1	1	3	0	1	0	0	0	0	0	0	0	0	0
1	2	1	3	7	3	2	2	1	0	2	4	0	2	0	0	0	0	0	0	1	2	0	0	2	5	1	2	2	1	2	8	0	1	8	1
1	1	1	4	7	2	2	2	1	0	0	0	0	0	0	0	0	0	0	0	0	0	0	0	0		1	1	3	1	2	5	0	1	3	1
1	2	1	3	7	1	4	2	4	0	0	0	0	0	0	0	0	0	0	0	0	0	0	0	0		2			0	2	30	1	1	2	0	1	0	0	0	0	0	0	0	0	0
1	1	2	4	4	1	4	1	1	1	15	6	0	2	0	0	4	0	0	5	1	2	0	0	2	3	1	1	2	0	2	9	0	2	3	1
1	1	1	5	7	1	1	3	4	0	0	0	0	0	0	0	0	0	0	0	0	2	2	0	0	3	1	2	2	0	2	4	0	1	3	1
1	2	1	4	7	2	2	2	1	6	0	0	0	0	0	0	0	0	0	0	0	0	0	0	0		2			1	2	10	0	1	3	1
1	2	1	3	5	3	4	1	1	0	0	0	0	0	0	0	0	0	0	0	0	0	0	0	0		2			0	2	15	1	1	3	0	1	0	0	0	0	0	0	0	0	0
3	1	1	2	7	1	2	2	1	0	0	0	0	0	0	0	0	0	0	0	0	0	0	0	0		1	1	1	0	2	4	0	1	3	1
1	2	1	2	6	1	2	1	4	0	0	0	0	0	0	0	0	0	0	0	0	0	0	0	0		1	1	2	1	3	0		1	3	1
1	1	1	5	7	2	2	2	1	0	0	1	0	0	0	0	0	0	0	1	1	0	0	0	0		2			1	2	18	1	1	1	0	1	0	0	0	0	0	0	0	0	0
1	2	1	5	7	3	2	2	1	0	5	4	0	0	0	4	0	0	0	1	1	3	3	0	0	5	1	3	2	1	2	21	1	1	3	0	1	0	0	0	0	0	0	0	0	0
1	1	1	2	6	1	4	1	1	0	0	0	0	0	0	0	0	0	0	0	0	0	0	0	0		2			1	2	0		1	3	1
1	1	1	3	7	1	1	3	1	0	0	0	0	0	0	0	0	0	0	0	0	0	0	0	0		2			1	2	11	0	1	3	1
3	2	1	1	7	1	2	2	4	0	0	0	0	0	0	0	0	0	0	0	0	0	0	0	0		2			1	2	30	1	1	1	0	1	0	0	0	0	0	0	0	0	0
1	2	2	4	3	2	4	2	1	0	5	0	0	1	0	0	0	0	0	0	6	0	0	0	0		2			1	2	27	1	2	1	0	1	0	0	0	0	0	0	0	0	0
1	2	1	3	6	1	2	2	1	0	0	3	0	0	0	0	0	0	0	0	2	4	4	0	0	3	1	2	2	1	2	9	0	1	3	1
1	2	1	8	7	1	2	1	1	0	0	6	0	0	0	0	0	0	0	2	0	6	0	0	6		2			1	2	7	0	3	3	1
1	2	1	5	5	3	1	3	1	0	2	0	0	0	0	0	0	0	0	1	0	3	2	0	1	3	1	2	3	0	3	14	0	1	3	1
1	2	1	5	7	1	2	2	1	0	38	0	0	0	0	4	0	0	0	3	1	7	7	0	0	5	1	1	4	1	2	15	1	1	3	0	1	0	0	0	0	0	0	0	0	0
1	2	1	4	7	1	2	2	1	0	0	0	0	0	0	0	0	0	0	1	0	0	0	0	0		2			1	2	15	1	1	3	0	1	0	0	0	0	0	0	0	0	0
1	2	1	5	7	1	2	2	1	0	0	0	0	0	0	0	0	0	0	0	0	0	0	0	0		2			0	2	36	1	1	3	0	1	0	0	0	0	0	0	0	0	0
1	2	1	3	7	1	4	1	4	0	9	0	0	0	0	0	0	0	0	0	1	3	3	0	0	3	1	1	2	1	2	33	1	1	1	0	1	0	0	0	0	0	0	0	0	0
1	2	1	3	7	2	2	2	1	2	0	10	0	0	0	0	40	0	0	4	3	0	0	0	0		1	1	2	1	2	14	0	1	3	1
1	2	1	5	7	3	2	2	1	0	4	6	0	0	0	0	0	0	0	0	0	0	0	0	0		2			1	2	2	0	1	3	1
1	1	1	4	7	2	2	2	1	0	2	0	0	0	0	0	0	0	0	0	0	1	1	0	0	3	1	1	1	0	2	17	1	1	3	0	1	0	0	0	0	0	0	0	0	0
1	2	1	2	7	1	2	2	1	0	6	3	0	0	0	0	0	0	0	3	1	0	0	0	0		1	1	3	1	2	7	0	1	3	1
1	2	1	3	5	3	4	2	4	0	0	0	0	0	0	0	0	0	0	2	0	5	5	0	0	5	1	1	2	1	2	4	0	1	3	1
1	2	2	5	7	1	2	2	1	1	5	0	0	0	0	0	9	0	0	3	1	0	0	0	0		2			1	2	50	1	2	9	0	1	0	0	0	0	0	0	0	0	0
1	1	1	4	7	1	4	1	1	1	15	0	0	1	0	0	0	0	0	2	0	2	2	0	0	5	1	1	2	1	2	18	1	1	3	0	1	0	0	0	0	0	0	0	0	0
1	2	1	6	7	2	1	2	1	0	15	2	0	0	0	0	40	0	0	1	0	0	0	0	0		1	2	6	1	2	32	0	1	3	0	0
1	2	1	4	4	3	2	2	5	0	30	20	0	7	0	3	250	0	0	1	2	2	0	0	2	6	1	2	2	1	2	8	0	1	3	1
1	2	1	3	6	1	4	1	1	0	0	0	0	0	0	0	0	0	0	0	0	0	0	0	0		2			1	2	11	0	1	3	1
1	2	1	4	7	1	2	2	1	0	0	0	0	0	0	0	1	0	0	1	0	0	0	0	0		2			0	2	3	0	1	3	1
1	2	1	3	7	1	2	2	1	0	0	0	0	3	0	8	0	0	0	2	4	3	3	0	0	3	1	2	2	1	2	7	0	1	3	1
1	1	1	4	7	1	1	3	1	0	0	0	0	0	0	0	0	0	0	0	0	0	0	0	0		2			1	2	17	1	1	3	0	1	0	0	0	0	0	0	0	0	0
1	2	1	3	6	1	2	2	1	0	5	0	0	0	0	0	0	0	0	1	1	0	0	0	0		2			1	2	7	0	1	3	1
1	2	1	3	7	1	4	1	1	0	0	0	0	0	0	0	0	0	0	0	0	0	0	0	0		1	2	3	1	2	10	0	1	3	1
1	2	2	7	7	1	1	3	1	0	0	0	0	0	0	2	0	0	0	0	0	0	0	0	0		2			1	2	6	0	2	3	1
1	2	1	4	7	1	2	2	1	0	4	0	0	1	0	2	0	0	0	2	1	0	0	0	0		2			1	2	4	0	1	3	1
1	2	1	3	5	3	4	1	4	0	0	0	0	0	0	0	0	0	0	0	0	0	0	0	0		1	1	2	0	2	29	1	1	2	0	1	0	0	0	0	0	0	0	0	0
1	2	1	4	2	1	2	2	1	0	2	2	0	0	0	0	0	0	0	0	0	8	8	0	0	5	1	1	2	1	2	21	0	1	3	0	0
1	2	1	2	7	3	4	2	1	0	4	7	0	0	0	2	3	0	0	0	0	2	0	0	2	5	1	3	2	1	2	4	0	1	3	1
3	1	1	3	7	1	4	1	4	0	0	0	0	0	0	0	0	0	0	0	0	0	0	0	0		2			1	2	27	1	1	3	0	1	0	0	0	0	0	0	0	0	0
1	2	1	3	6	1	2	2	4	0	0	0	0	0	0	0	0	0	0	0	0	0	0	0	0		2			0	2	5	0	1	3	1
1	1	1	4	7	1	1	3	1	0	0	0	0	0	0	0	0	0	0	0	0	0	0	0	0		2			1	2	38	1	1	1	0	1	0	0	0	0	0	0	0	0	0
1	2	1	3	7	2	2	2	1	7	0	0	0	0	0	0	15	0	0	1	0	18	17	0	1	5	1	2	2	1	2	6	0	1	3	1
1	2	1	4	7	2	2	2	4	0	12	0	0	0	0	0	0	0	0	0	1	4	4	0	0	5	1	2	3	0	2	12	0	1	3	1
1	2	2	4	7	2	2	2	1	2	2	1	0	0	0	0	20	9	0	2	1	9	0	0	9	5	1	3	2	0	2	1	0	2	3	1
1	2	2	5	5	2	2	2	1	0	13	0	0	0	0	0	0	0	0	4	2	0	0	0	0		1	1	2	1	2	10	0	1	3	1
1	2	1	2	7	2	2	2	5	0	3	0	0	0	0	0	0	0	0	0	0	0	0	0	0		2			1	2	6	0	1	3	1
1	2	1	6	7	2	2	2	1	1	10	5	0	0	0	0	12	0	0	0	0	0	0	0	0		1	2	2	1	2	9	0	1	3	1
1	1	1	4	7	1	1	3	1	0	0	0	0	0	0	0	0	0	0	0	0	0	0	0	0		2			1	2	8	0	1	3	1
1	1	1	3	6	1	2	2	4	0	0	0	0	0	0	0	0	0	0	0	0	0	0	0	0		2			1	2	16	1	1	3	0	1	0	0	0	0	0	0	0	0	0
1	2	1	2	5	3	2	2	1	2	0	0	0	1	0	0	7	0	0	0	0	1	1	0	0	5	1	1	2	1	2	11	0	1	3	1
1	2	2	4	6	3	2	2	4	0	4	0	0	3	0	0	100	0	0	3	1	0	0	0	0		2			1	2	78	1	1	1	0	1	0	0	0	0	0	0	0	0	0
1	2	1	4	5	3	2	2	1	0	5	6	0	4	0	0	0	0	0	2	0	12	12	0	0	5	1	2	2	0	2	21	1	1	3	0	1	0	0	0	0	0	0	0	0	0
1	2	1	6	7	2	2	2	1	0	20	2	0	2	0	0	0	0	0	4	1	0	0	0	0		2			1	2	10	0	1	3	1
1	2	1	4	7	1	2	2	1	0	0	0	0	1	0	0	0	0	0	2	0	7	2	0	5	6	1	1	2	1	2	16	1	1	3	0	1	0	0	0	0	0	0	0	0	0
1	2	1	4	7	1	2	1	1	0	6	0	0	0	0	0	0	0	0	1	0	1	1	0	0	5	1	1	2	1	2	7	0	1	3	1
1	2	1	3	6	1	2	2	1	0	5	0	0	0	0	0	0	0	0	1	0	0	0	0	0		2			1	2	15	1	1	3	0	1	0	0	0	0	0	0	0	0	0
1	2	1	4	3	1	4	1	4	0	30	2	0	0	0	0	30	0	0	2	1	0	0	0	0		2			0	3	0		1	3	1
1	2	1	5	2	1	2	2	1	0	20	0	4	1	0	0	0	0	0	3	1	7	0	0	7	4	1	2	5	1	2	60	1	1	4	0	1	0	1	1	0	1	0	0	0	1	103	60	1	0
1	2	1	3	6	2	2	2	1	0	30	4	0	0	0	0	0	0	0	0	0	1	0	1	0		2			1	2	36	1	1	1	0	1	0	0	0	0	0	0	0	0	0
1	2	2	7	7	1	4	1	1	0	0	0	0	0	0	0	0	0	0	2	0	0	0	0	0		2			1	2	5	0	2	3	1
1	2	2	5	5	3	2	2	1	1	0	6	0	0	0	1	1	0	0	2	0	0	0	0	0		2			1	2	22	1	2	1	0	1	0	0	0	0	0	0	0	0	0
1	2	2	1	7	3	2	2	1	0	0	20	0	0	0	0	0	0	0	1	1	0	0	0	0		2			1	2	3	0	2	3	1
3	2	1	3	7	3	2	2	1	0	0	0	0	0	0	0	0	0	0	0	0	3	0	1	2	3	1	2	2	1	2	35	0	1	1	0	0
1	1	1	4	7	3	2	2	1	0	2	0	0	0	0	0	0	0	0	0	0	2	2	0	0	3	1	2	2	1	2	13	0	1	3	1
1	2	1	3	3	1	4	1	1	0	12	0	0	0	0	0	0	0	0	1	1	0	0	0	0		2			1	2	10	0	1	3	1
1	2	1	2	6	1	4	1	4	0	0	0	0	0	0	0	0	0	0	0	0	0	0	0	0		2			1	2	5	0	1	3	1
1	2	1	3	2	1	2	2	1	0	0	0	0	0	0	0	0	0	0	2	0	0	0	0	0		2			1	3	11	0	1	3	1
1	1	1	3	7	1	4	3	4	0	0	18	0	0	0	0	0	0	0	0	0	0	0	0	0		2			0	2	4	0	1	3	1
1	2	2	3	7	1	1	3	1	0	5	0	0	0	0	0	0	0	0	0	0	2	2	0	0	3	1	2	2	0	2	17	1	1	2	0	1	0	0	0	0	0	0	0	0	0
1	2	1	5	7	1	2	1	1	0	20	40	0	1	0	0	0	0	0	1	1	1	1	0	0	3	1	1	2	1	2	13	0	1	7	1
1	2	1	4	4	2	4	1	1	0	38	2	0	2	0	0	0	0	0	2	1	9	7	0	2	5	1	2	2	1	3	18	1	1	8	0	1	0	0	1	0	0	0	0	0	0
1	1	1	3	6	1	1	3	1	0	0	0	0	0	0	0	0	0	0	0	0	0	0	0	0		2			1	2	0		1	3	1
1	2	1	4	7	1	1	3	1	0	0	20	0	0	0	0	0	0	0	0	0	0	0	0	0		2			1	2	77	0	1	1	0	0
1	2	1	4	7	3	2	2	1	0	3	0	0	0	0	0	0	0	0	1	0	2	0	0	0		2			1	2	7	0	1	3	1
1	2	1	3	7	1	2	2	1	0	20	0	0	4	0	0	50	0	0	0	0	1	0	0	1	5	1	2	2	0	2	10	0	1	3	1
1	2	2	4	7	1	2	2	1	0	1	0	0	0	0	1	0	0	0	2	3	0	0	0	0		2			0	2	6	0	2	3	1
1	1	1	4	6	1	4	1	1	0	0	0	0	0	0	0	0	0	0	0	0	0	0	0	0		2			0	2	20	1	1	3	0	1	0	0	0	0	0	0	0	0	0
1	1	1	5	7	1	1	3	1	0	4	1	0	0	0	0	0	0	0	0	0	1	1	0	0	5	1	2	3	0	3	16	0	1	3	0	0
1	1	1	6	7	2	2	2	1	0	0	0	0	0	0	0	0	0	0	0	0	2	0	0	2	3	1	1	3	0	2	17	1	1	3	0	1	0	0	0	0	0	0	0	0	0
1	2	2	5	7	1	2	2	1	3	2	5	0	1	0	3	0	0	0	2	1	3	3	0	0	5	1	1	2	1	2	18	1	1	3	0	1	0	0	0	0	0	0	0	0	0
2	2	1	3	6	3	2	2	4	2	3	3	0	0	0	0	0	0	0	0	0	4	0	0	0		2			0	2	4	0	1	3	1
1	2	2	4	7	2	2	2	1	0	15	0	0	0	0	0	0	0	0	4	2	0	0	0	0		1	2	3	0	2	10	0	1	3	1
1	2	2	4	7	2	2	2	1	0	0	0	0	1	0	0	0	0	0	2	3	18	0	0	18	6	1	1	2	0	2	22	1	1	2	0	1	0	0	0	0	0	0	0	0	0
1	2	1	4	7	1	4	1	4	0	0	0	0	0	0	0	0	0	0	1	0	0	0	0	0		2			0	2	3	0	1	3	1
1	1	1	5	3	1	4	1	1	0	5	0	0	0	0	0	0	0	0	1	1	0	0	0	0		2			0	2	10	0	1	3	1
1	2	1	6	7	1	1	3	1	0	9	3	0	0	0	0	0	0	0	1	1	0	0	0	0		2			0	2	18	1	1	3	0	1	0	0	0	0	0	0	0	0	0
1	2	2	4	6	1	2	2	4	0	7	2	0	0	0	0	0	0	0	2	0	5	5	0	0	3	1	1	2	0	2	21	1	2	2	0	1	0	0	0	0	0	0	0	0	0
3	1	1	2	7	1	2	2	4	0	8	0	0	0	0	0	0	0	0	0	0	8	8	0	0	5	1	2	2	0	2	1	0	1	3	1
1	2	1	6	7	1	1	3	1	0	15	20	0	0	0	0	0	0	0	1	1	0	0	0	0		1	1	1	0	2	19	1	1	3	0	1	0	0	0	0	1	0	0	0	0
3	1	2	15	7	1	1	3	1	0	2	1	0	0	0	0	0	0	0	3	0	0	0	0	0		2			0	2	18	1	1	3	0	1	0	0	0	0	0	0	0	0	0
3	2	1	4	5	3	2	2	1	0	6	2	0	0	0	0	0	0	0	2	0	5	0	1	4	5	1	3	2	0	2	10	0	1	8	1
1	2	1	3	7	1	2	2	1	0	0	0	0	0	0	0	0	0	0	1	0	0	0	0	0		2			0	3	3	0	1	3	1
1	2	1	2	6	1	2	2	4	0	0	0	0	0	0	0	0	0	0	0	0	0	0	0	0		2			0	2	22	1	1	2	0	1	0	0	1	0	1	0	0	0	1	3214	22	5
1	2	2	4	7	3	4	1	1	3	5	7	0	0	0	0	30	0	0	2	0	0	0	0	0		2			0	2	19	1	2	2	0	1	0	0	0	0	0	0	0	0	0
1	2	1	4	7	3	2	2	1	1	0	0	0	0	0	2	0	0	0	1	0	0	0	0	0		1	2	2	0	2	10	0	1	8	1
1	2	1	3	6	1	2	2	1	0	0	5	0	0	0	1	0	0	0	0	0	0	0	0	0		1	3	2	0	3	15	1	1	3	0	1	0	0	0	0	0	0	0	0	0
1	2	2	4	7	1	2	2	1	0	0	5	0	0	0	0	0	0	0	0	0	0	0	0	0		2			0	2	0		2	3	1
1	2	1	3	7	1	2	2	1	0	0	0	0	0	0	0	0	0	0	0	0	0	0	0	0		2			0	2	8	0	1	3	1
1	2	1	2	7	1	2	2	4	0	0	6	0	0	0	0	0	0	0	0	0	0	0	0	0		2			0	2	2	0	1	3	1
1	2	1	3	7	2	2	2	1	0	1	1	0	0	0	0	0	0	0	4	0	1	0	0	0		2			0	2	17	1	1	2	0	1	0	0	0	0	0	0	0	0	0
1	1	1	5	7	1	2	2	1	0	10	0	0	0	0	0	0	0	0	1	0	20	5	0	15	5	1	1	1	1	3	13	0	1	3	1
2	2	1	3	6	3	2	2	4	2	3	3	0	0	0	0	0	0	0	0	0	4	0	0	0		2			0	2	22	1	1	2	0	1	0	0	0	0	0	0	0	0	0
1	2	2	4	7	3	2	2	1	0	11	0	0	0	0	0	5	0	0	1	1	13	13	0	0	3	1	1	2	0	2	10	0	3	3	1
3	2	1	4	5	3	2	2	1	0	20	0	0	10	0	0	3	0	0	2	0	14	0	0	14	6	1	1	1	1	2	33	1	1	1	0	1	0	0	0	0	0	0	0	0	0
1	2	1	5	7	1	2	2	1	0	0	0	0	0	0	0	0	0	0	1	1	0	0	0	0		2			1	2	23	1	1	7	0	1	0	0	0	0	0	0	0	0	0
1	2	1	4	7	1	2	2	1	6	7	0	0	0	0	0	0	0	0	0	0	2	2	0	0	3	1	2	2	0	2	5	0	1	3	1
1	2	1	5	7	1	2	2	1	0	0	0	0	0	0	0	0	0	0	0	0	3	3	0	0	5	1	1	2	0	2	6	0	1	3	1
1	2	1	1	6	1	2	2	4	0	2	0	0	0	0	0	0	0	0	0	0	0	0	0	0		2			1	2	21	1	1	3	0	1	0	0	0	0	0	0	0	0	0
1	2	1	2	5	3	4	2	4	0	0	0	0	0	0	0	0	0	0	0	0	0	0	0	0		2			1	2	1	0	1	3	1
1	2	1	4	7	1	1	3	1	0	0	0	0	0	0	0	0	0	0	0	0	0	0	0	0		2			0	2	13	0	1	3	1
1	1	1	3	7	1	2	2	1	0	0	0	0	0	0	0	0	0	0	0	0	0	0	0	0		2			0	2	11	0	1	3	1
1	2	1	3	7	1	2	1	1	0	60	0	0	0	0	0	0	0	0	0	1	3	3	0	0	5	1	1	6	0	2	2	0	1	3	1
1	2	1	3	7	1	2	2	1	0	6	9	0	0	0	0	0	0	0	1	0	1	1	0	0	6	1	1	2	0	2	33	1	1	2	0	1	0	0	0	0	0	0	0	0	0
1	2	2	5	5	3	2	2	5	7	20	0	0	2	0	1	10	0	0	1	1	12	0	0	12		2			0	3	18	0	1	3	0	0
1	2	1	3	7	2	4	1	1	0	9	0	0	0	0	0	0	0	0	1	0	5	0	0	0		2			1	2	2	0	1	3	1
1	2	1	5	6	1	1	3	1	0	1	3	0	1	0	0	0	0	0	1	1	0	0	0	0		2			0	2	65	1	1	2	0	1	0	0	0	0	0	0	0	0	0
1	2	2	3	7	3	4	1	1	18	15	8	0	1	0	4	10	0	0	1	0	2	0	0	0		2			0	2	1	0	2	3	1
1	1	1	4	7	2	2	2	1	0	0	0	0	0	0	0	0	0	0	0	0	0	0	0	0		1	1	3	0	2	42	1	1	2	0	1	0	0	0	0	0	0	0	0	0
1	2	1	3	5	3	2	2	1	0	15	10	0	1	0	6	0	0	0	2	0	0	0	0	0		2			1	2	18	1	1	3	0	1	0	0	0	0	0	0	0	0	0
1	2	1	3	7	2	2	1	1	8	2	2	0	0	0	0	0	0	0	1	1	3	0	0	3	5	1	3	2	0	2	5	0	1	3	1
1	2	1	4	7	1	2	2	1	0	2	0	0	0	0	1	0	5	0	2	0	11	11	0	0	5	1	1	3	0	2	16	1	1	3	0	1	0	0	0	0	0	0	0	0	0
1	2	1	3	7	2	2	2	1	0	15	10	0	0	0	0	0	0	0	1	2	14	4	0	10	3	1	2	2	0	2	16	1	1	3	0	1	0	0	0	0	0	0	0	0	0
1	2	1	3	5	3	4	1	1	0	0	0	0	0	0	0	0	0	0	0	0	0	0	0	0		2			0	2	3	0	1	3	1
1	1	1	3	7	1	2	2	1	0	0	0	0	0	0	0	0	0	0	1	0	4	4	0	0	3	1	1	2	0	2	13	0	1	3	1
3	2	1	4	7	3	2	2	1	1	8	10	0	0	0	0	0	0	0	1	1	2	2	0	0	3	1	1	3	0	2	5	0	1	3	1
3	2	1	3	2	1	2	2	4	0	15	4	1	0	0	0	0	0	0	1	1	0	0	0	0		2			0	2	7	0	1	3	1
1	2	1	2	7	2	2	2	5	0	0	0	0	0	0	0	0	0	0	1	0	1	0	0	0		2			0	2	1	0	1	3	1
1	1	2	4	7	1	2	1	1	0	3	7	0	0	0	0	0	0	0	0	0	7	7	0	0	5	1	1	2	0	2	1	0	2	3	1
1	1	1	2	7	1	2	2	1	0	0	0	0	0	0	0	0	0	0	2	0	1	1	0	0	3	1	2	3	1	2	6	0	1	3	1
2	2	1	2	6	1	2	2	4	0	15	0	0	0	0	0	0	0	0	0	0	1	1	0	0	3	1	3	3	1	2	37	1	1	1	0	1	0	0	0	0	0	0	0	0	0
1	1	1	4	7	3	2	2	1	0	2	0	0	0	0	0	0	0	0	1	1	1	1	0	0	5	1	1	2	0	2	20	1	1	3	0	1	0	0	1	0	0	0	0	0	0
1	2	1	4	5	3	2	2	1	3	12	0	0	1	0	0	6	0	0	2	1	4	1	0	3	6	1	2	2	0	2	1	0	1	3	1
1	2	1	4	2	1	1	1	1	12	6	0	0	0	0	0	0	0	0	3	0	0	0	0	0		2			0	2	23	1	1	3	0	1	0	0	0	0	0	0	0	0	0
1	2	1	3	5	3	2	2	5	0	0	0	0	1	0	0	20	0	0	1	0	0	0	0	0		2			1	2	77	1	1	1	0	1	0	0	0	0	0	0	0	0	0
1	1	2	5	7	1	1	3	1	0	0	12	0	0	0	0	0	0	0	0	1	0	0	0	0		2			0	2	18	1	1	2	0	1	0	0	0	0	0	0	0	0	0
1	2	1	2	7	1	1	3	1	0	0	0	0	0	0	0	0	0	0	0	0	0	0	0	0		2			0	2	23	1	1	2	0	1	0	0	0	0	0	0	0	0	0
1	2	1	4	7	2	2	2	1	0	0	0	0	0	0	0	0	0	0	0	0	4	4	0	0	5	1	1	3	0	2	26	1	1	2	0	1	0	0	0	0	0	0	0	0	0
1	2	2	5	6	1	2	2	1	0	1	0	0	0	0	0	0	0	0	0	0	0	0	0	0		2			0	2	27	1	2	2	0	1	0	0	0	0	0	0	0	0	0
1	2	2	6	5	2	1	1	1	4	10	10	5	7	0	8	10	0	0	2	0	20	0	0	0		2			0	2	12	0	2	3	1
1	1	2	5	7	1	2	2	1	0	7	5	0	0	0	0	0	0	0	0	0	0	0	0	0		2			0	2	22	1	1	3	0	1	0	0	0	0	0	0	0	0	0
1	1	1	3	6	1	2	2	4	0	0	8	0	0	0	0	0	0	0	0	0	1	1	0	0	3	1	1	2	0	2	21	1	1	2	0	1	0	0	0	0	0	0	0	0	0
1	2	1	4	7	1	4	1	1	0	0	0	0	0	0	1	0	0	0	1	1	1	1	0	0	5	1	1	2	0	2	8	0	1	3	1
1	2	1	3	7	2	2	2	1	0	3	0	0	0	0	0	0	0	0	1	0	1	1	0	0	3	1	1	3	0	2	8	0	1	3	1
1	2	2	3	6	1	2	2	1	3	3	10	0	0	0	2	0	0	0	1	0	1	1	0	0	5	1	2	2	0	2	17	1	2	2	0	1	0	0	0	0	0	0	0	0	0
1	2	1	4	7	1	2	2	1	0	5	0	0	0	0	0	0	0	0	0	0	2	2	0	0	3	1	1	2	0	2	8	0	1	3	1
1	2	1	3	5	2	2	2	1	0	0	0	0	0	0	1	0	0	0	0	0	0	0	0	0		2			1	2	0		1	3	1
1	2	1	5	7	2	2	2	1	3	0	0	0	1	0	0	0	0	0	1	1	1	0	0	1		2			0	2	3	0	1	3	1
1	2	2	4	7	2	2	2	1	0	3	0	0	1	0	0	0	0	0	3	0	0	0	0	0		1	2	5	0	2	17	1	2	2	0	1	0	0	0	0	0	0	0	0	0
1	2	1	4	7	1	2	2	1	15	7	0	0	0	0	0	0	0	0	2	2	5	5	0	0	6	1	2	3	0	2	11	0	1	3	1
1	1	1	2	6	1	1	3	4	0	0	0	0	0	0	0	0	0	0	0	0	1	1	0	0	5	1	1	3	0	2	19	1	1	2	0	1	0	0	0	0	0	0	1	0	0
1	2	1	4	4	3	2	2	1	0	0	0	0	3	0	0	6	0	0	2	1	5	5	0	0	5	1	1	3	1	2	6	0	1	3	1
1	2	1	4	6	1	1	3	1	0	3	2	0	0	0	0	2	0	0	2	0	0	0	0	0		2			1	2	10	0	1	3	1
1	2	1	2	7	2	4	1	1	0	0	0	0	0	0	0	0	0	0	0	0	0	0	0	0		2			0	2	22	0	1	3	0	0
1	2	2	5	7	1	1	3	1	0	0	0	0	0	0	0	0	0	0	0	0	0	0	0	0		2			0	2	4	0	2	3	1
1	2	1	4	7	1	2	2	1	0	0	10	0	0	0	0	0	0	0	4	0	0	0	0	0		1	1	1	0	2	8	0	1	3	1
1	2	1	5	4	3	2	2	5	4	4	5	0	1	0	0	6	30	0	0	1	3	2	0	1	3	1	1	2	0	2	39	1	1	2	0	1	0	0	0	0	0	0	0	0	0
1	2	1	4	7	1	1	3	1	0	3	0	0	0	0	0	0	0	0	0	0	1	1	0	0	3	1	1	3	1	2	6	0	1	3	1
1	2	1	3	6	1	2	1	1	0	0	0	0	0	0	0	0	0	0	2	1	0	0	0	0		1	1	3	0	2	6	0	1	3	1
1	1	1	4	7	1	1	3	1	2	9	8	0	0	0	0	0	0	0	1	2	0	0	0	0		2			0	2	7	0	1	3	1
1	2	1	2	6	1	2	2	4	0	0	5	0	0	0	0	0	0	0	1	0	2	2	0	0	3	1	1	2	0	2	6	0	1	3	1
1	2	2	4	7	2	2	2	1	1	0	10	1	6	0	10	41	0	0	1	0	1	0	0	1	5	1	1	2	0	2	3	0	1	8	1
1	1	1	4	7	1	1	3	1	0	0	0	0	0	0	0	0	0	0	1	0	0	0	0	0		2			0	2	22	1	1	3	0	1	0	0	1	0	0	0	1	0	1	3097	22	1	0
1	2	1	3	5	3	4	1	1	2	0	0	0	0	0	0	0	0	0	0	0	2	2	0	0	5	1	2	2	0	2	12	0	1	3	1
1	2	1	3	7	1	4	1	1	0	0	0	0	0	0	0	0	0	0	1	1	2	1	1	0	3	1	1	2	1	2	15	1	1	3	0	1	0	0	0	0	0	0	0	0	0
1	2	1	3	7	1	1	3	1	0	15	11	0	0	0	0	0	0	0	1	1	0	0	0	0		1	2	2	0	2	49	1	1	2	0	1	0	0	0	0	0	0	0	0	0
1	2	1	4	7	1	1	3	1	0	0	20	0	0	0	0	0	0	0	3	1	0	0	0	0		1	2	3	0	2	71	1	1	2	0	1	0	0	0	0	0	0	0	0	0
1	2	1	3	6	1	4	1	4	0	9	8	0	0	0	0	0	0	0	0	1	0	0	0	0		2			0	2	9	0	1	3	1
1	2	1	2	7	1	4	1	1	0	0	0	0	0	0	0	0	0	0	0	1	0	0	0	0		2			1	2	6	0	1	3	1
1	1	1	1	6	1	2	2	4	0	0	0	0	0	0	0	0	0	0	0	0	0	0	0	0		2			0	2	20	1	1	2	0	1	0	0	0	0	0	0	0	0	0
1	2	1	3	7	1	4	1	1	0	0	0	0	0	0	0	0	0	0	1	1	2	1	1	0	3	1	1	2	1	2	45	1	1	1	0	1	0	0	0	0	0	0	0	0	0
1	2	1	2	7	1	2	2	1	0	2	8	0	0	0	0	0	0	0	4	0	0	0	0	0		2			0	2	16	1	1	3	0	1	0	0	0	0	0	0	0	0	0
1	2	1	4	7	1	2	2	1	0	10	2	0	0	0	0	0	0	0	0	0	0	0	0	0		2			0	2	4	0	1	3	1
1	2	1	3	7	3	2	2	1	0	30	0	0	0	0	0	0	0	0	0	0	5	5	0	0	5	1	2	2	0	2	2	0	1	3	1
3	1	1	3	7	1	1	3	1	0	0	0	0	0	0	0	0	0	0	0	0	0	0	0	0		1	1	2	0	2	23	1	1	2	0	1	0	0	0	0	0	0	0	0	0
1	1	2	4	7	1	2	2	1	0	0	0	0	0	0	0	0	0	0	0	0	0	0	0	0		2			0	2	37	1	2	2	0	1	0	0	0	0	0	0	0	0	0
1	1	1	2	7	1	1	3	1	0	0	0	0	0	0	0	0	0	0	0	0	0	0	0	0		2			0	2	8	0	1	3	1
1	2	1	2	7	1	4	1	5	0	12	0	0	0	0	0	0	0	0	1	0	5	5	0	0	5	1	1	2	0	2	8	0	1	3	1
1	2	1	3	4	3	4	1	5	0	6	0	0	2	1	10	60	0	0	0	0	0	0	0	0		2			1	2	55	0	1	7	0	0
1	2	1	3	5	3	4	1	5	10	10	0	6	5	1	10	100	0	0	3	0	8	0	0	8	6	1	2	2	0	2	7	0	1	3	1
1	2	1	3	6	1	1	3	1	1	0	1	0	1	0	0	0	0	0	1	1	0	0	0	0		2			0	2	5	0	1	3	1
1	2	1	3	7	1	4	1	5	1	80	7	0	0	0	0	3	0	0	1	0	1	0	1	0	5	1	2	5	0	2	18	0	1	2	0	0
1	1	1	4	7	1	1	3	1	0	0	0	0	0	0	0	0	0	0	1	0	0	0	0	0		2			0	2	23	0	1	2	0	0
1	1	1	6	7	1	2	2	1	0	0	0	0	0	0	0	0	0	0	1	2	0	0	0	0		1	1	1	0	2	9	0	1	3	1
1	2	2	4	7	1	2	2	1	0	0	5	0	0	0	0	0	0	0	0	0	0	0	0	0		2			0	2	3	0	2	3	1
1	2	1	2	2	1	2	2	1	0	2	0	0	0	0	0	3	0	0	1	0	0	0	0	0		2			0	2	31	1	1	2	0	1	0	0	1	1	0	0	1	0	1	3668	32	0
1	2	2	2	7	1	1	1	1	0	0	0	0	0	0	0	0	0	0	0	0	0	0	0	0		1	1	3	1	2	2	0	2	3	1
1	2	1	2	7	2	4	1	4	0	0	0	0	0	0	0	0	0	0	0	0	1	0	1	0		2			0	2	0		1	3	1
1	2	1	4	5	3	2	2	1	1	8	12	0	0	0	0	2	0	0	0	2	1	0	0	1	3	1	2	2	0	2	11	0	1	3	1
1	2	1	2	7	2	4	1	1	0	15	12	0	0	0	0	0	0	0	0	0	1	1	0	0	3	1	2	2	0	2	3	0	1	3	1
2	2	1	3	7	1	4	1	1	0	0	0	0	0	0	0	0	0	0	0	0	0	0	0	0		2			1	2	28	1	1	1	0	1	0	0	0	0	0	0	0	0	0
1	2	1	3	6	1	4	1	1	0	0	4	0	0	0	0	0	0	0	0	0	0	0	0	0		2			0	2	1	0	1	3	1
1	2	1	3	7	1	2	2	1	4	3	5	0	1	0	0	0	0	0	1	1	2	0	0	2	4	1	2	2	1	2	12	0	1	3	1
1	1	2	5	7	1	2	2	1	6	2	10	0	0	0	0	0	0	0	0	2	0	0	0	0		2			0	3	15	1	2	3	0	1	0	0	0	0	0	0	0	0	0
1	2	1	4	7	3	2	2	4	0	10	0	0	0	0	3	0	0	0	0	1	3	3	0	0	5	1	1	2	0	2	11	0	1	3	1
1	2	1	2	2	1	4	1	1	0	0	0	0	0	0	0	0	0	0	1	0	0	0	0	0		2			0	2	19	1	1	2	0	1	0	0	0	0	0	0	0	0	0
1	1	1	1	7	2	4	2	1	0	0	0	0	0	0	0	0	0	0	0	0	0	0	0	0		2			0	2	19	1	1	2	0	1	0	0	0	0	0	0	0	0	0
1	2	1	3	5	3	2	2	1	10	6	26	0	0	0	0	1	0	0	0	0	0	0	0	0		2			0	2	12	0	1	3	1
1	2	2	4	7	2	2	2	1	0	5	0	0	1	0	0	7	0	0	0	2	0	0	0	0		2			0	2	18	1	1	8	0	1	0	0	0	0	0	0	0	0	0
1	2	1	3	7	2	2	2	1	0	0	0	0	0	0	0	0	0	0	0	0	1	0	1	0	3	1	3	3	0	2	1	0	1	3	1
1	2	1	4	7	1	2	2	1	0	0	0	0	0	0	0	0	0	0	1	0	5	0	0	5	5	1	1	6	0	2	10	0	1	3	1
1	2	1	2	7	3	2	2	1	0	10	0	0	0	0	0	0	0	0	0	0	2	2	0	0	5	1	1	3	0	2	3	0	1	3	1
1	1	1	4	7	2	2	2	1	0	10	0	0	0	0	0	0	0	0	0	0	11	0	4	7	3	1	1	3	0	2	14	0	1	3	1
1	2	1	2	4	3	2	2	5	0	6	0	0	0	0	0	0	0	0	0	1	1	1	0	0	5	1	3	2	1	U	10	0	1	3	1
1	2	1	3	7	1	2	2	1	0	0	0	0	0	0	0	0	0	0	0	0	0	0	0	0		2			0	3	0		1	3	1
3	2	1	4	7	1	2	2	1	0	0	0	0	0	0	0	0	0	0	0	0	0	0	0	0		2			0	2	10	0	1	3	1
1	2	1	5	7	1	1	3	1	0	0	0	0	0	0	0	0	0	0	1	0	0	0	0	0		2			0	2	54	1	1	2	0	1	0	0	1	1	0	0	1	0	1	340	55	1	1
1	2	2	5	7	1	2	2	1	0	0	0	0	1	0	0	0	0	0	1	0	1	1	0	0	5	1	3	2	0	2	1	0	1	3	1
1	2	1	2	7	1	2	2	1	0	0	0	0	0	0	0	0	0	0	0	0	0	0	0	0		2			0	2	8	0	1	3	1
1	2	1	4	5	3	1	3	1	0	10	2	0	1	0	0	0	0	0	1	1	0	0	0	0		2			0	2	10	0	1	3	1
1	2	2	4	7	1	2	2	1	0	4	0	0	0	0	0	0	0	0	1	1	3	3	0	0	6	1	1	2	1	2	24	1	2	3	0	1	0	0	0	0	0	0	0	0	0
1	2	1	2	6	1	4	1	1	0	0	0	0	0	0	0	0	0	0	1	0	0	0	0	0		2			0	2	10	0	1	3	1
3	1	1	3	6	1	4	1	1	0	50	0	0	0	0	0	0	0	0	1	0	1	1	0	0	3	1	2	2	1	2	35	1	1	1	0	1	0	0	0	0	0	0	0	0	0
1	2	1	3	7	1	4	1	1	0	0	0	0	0	0	0	0	0	0	1	1	0	0	0	0		2			1	2	40	1	1	1	0	1	0	0	0	0	0	0	0	0	0
1	2	1	4	7	1	1	3	4	0	0	0	0	0	0	0	0	0	0	0	1	0	0	0	0		2			0	2	23	1	1	3	0	1	0	1	1	0	0	0	0	0	1	1007	23	5
1	3	1	1	2	1	4	1	5	0	3	0	0	0	0	0	0	0	0	0	2	1	0	1	0		2			0	2	40	1	1	2	0	1	0	0	0	0	0	0	0	0	0
1	2	1	3	2	4	2	1	4	0	7	7	0	0	0	0	0	0	0	0	0	1	1	0	0	3	1	3	2	1	2	0		1	3	1
1	2	1	5	7	1	2	1	1	0	0	0	0	0	0	0	1	0	0	1	1	1	1	0	0	5	1	2	2	1	2	9	0	1	3	1
1	2	1	4	7	1	4	1	5	0	0	0	0	0	0	0	0	0	0	0	0	0	0	0	0		2			0	2	57	1	1	2	0	1	0	0	0	0	0	0	0	0	0
1	2	1	3	6	1	1	3	4	0	8	3	0	0	0	0	0	0	0	0	0	4	4	0	0	3	1	1	3	0	2	4	0	1	3	1
1	2	1	2	5	3	2	2	1	0	3	0	0	0	0	2	1	0	0	0	0	3	3	0	0	5	1	1	2	1	2	4	0	1	3	1
1	2	1	6	7	2	2	2	1	0	70	6	0	0	0	10	60	7	0	2	1	2	2	0	0	5	1	1	3	0	2	60	1	1	2	0	1	0	0	0	0	0	0	0	0	0
1	2	2	5	7	1	2	2	1	0	0	0	0	0	0	0	0	0	0	3	1	3	3	0	0	3	1	1	2	0	2	30	1	2	2	0	1	0	0	0	0	0	0	0	0	0
1	2	1	5	7	2	2	2	1	0	2	0	0	0	0	0	0	0	0	0	0	0	0	0	0		2			0	2	24	1	1	2	0	1	0	0	0	0	0	0	0	0	0
1	2	1	2	7	1	4	1	1	0	0	6	0	0	0	0	0	0	0	2	2	0	0	0	0		1	2	3	0	2	16	1	1	3	0	1	0	0	0	0	0	0	0	0	0
1	2	1	2	6	1	4	1	5	0	6	0	0	0	0	0	0	0	0	1	0	1	1	0	0	5	1	1	6	1	2	20	1	1	3	0	1	0	0	0	0	0	0	0	0	0
1	2	1	5	7	3	2	2	1	0	7	0	0	0	0	0	0	0	0	3	1	0	0	0	0		1	1	2	0	2	31	1	1	3	0	1	0	0	0	0	0	0	0	0	0
1	2	1	7	4	3	2	2	1	2	2	0	0	1	0	0	20	2	0	0	3	4	0	0	4	5	1	1	2	0	2	11	0	1	3	1
1	2	1	4	7	1	2	2	1	0	0	1	0	3	0	0	0	0	0	1	0	1	1	0	0	3	1	1	2	0	2	42	1	1	2	0	1	0	0	0	0	0	0	0	0	0
1	2	1	3	7	2	2	2	1	0	8	10	0	0	0	0	0	0	0	0	0	0	0	0	0		2			0	2	41	1	1	2	0	1	0	0	0	0	0	0	0	0	0
1	2	1	3	7	1	4	1	1	0	0	7	0	0	0	0	0	0	0	0	0	0	0	0	0		2			0	2	40	1	1	2	0	1	0	1	0	1	0	0	0	0	1	3425	41	1	0
1	2	1	3	7	2	2	2	1	0	0	0	0	0	0	0	0	0	0	0	0	0	0	0	0		2			0	2	0		1	3	1
1	2	1	4	7	1	2	2	1	0	8	2	0	0	0	1	0	0	0	1	1	1	1	0	0	3	1	1	2	1	I	18	1	1	8	0	1	0	0	0	0	0	0	0	0	0
1	2	1	4	7	3	4	1	4	6	4	3	0	0	0	0	5	0	0	1	0	0	0	0	0		1	1	2	0	2	31	1	1	2	0	1	0	0	0	0	0	0	0	0	0
1	2	1	2	6	1	4	1	4	0	4	5	0	0	0	0	0	0	0	0	0	0	0	0	0		2			0	2	1	0	1	3	1
1	2	1	4	7	4	2	2	1	0	0	2	0	0	0	0	0	0	0	0	0	0	0	0	0		2			0	2	17	1	1	3	0	1	0	0	0	0	0	0	0	0	0
1	2	1	4	6	1	2	1	4	0	5	0	0	1	0	5	15	0	0	2	0	0	0	0	0		2			0	2	31	1	1	2	0	1	0	0	0	0	0	0	0	0	0
1	1	1	4	7	1	2	2	1	0	0	0	0	0	0	0	0	0	0	0	0	0	0	0	0		2			0	2	49	1	1	2	0	1	0	0	0	0	0	0	0	0	0
1	2	1	4	7	1	1	3	1	0	0	0	0	0	0	0	0	0	0	0	0	0	0	0	0		2			0	3	1	0	1	3	1
1	2	1	3	6	1	4	1	1	0	8	4	0	0	0	0	0	0	0	0	0	0	0	0	0		2			0	2	0		1	3	1
1	2	1	4	7	1	2	2	1	0	0	7	0	0	0	0	0	0	0	0	0	1	1	0	0	3	1	1	2	0	2	12	0	1	3	1
1	2	2	4	7	1	2	2	1	0	0	5	0	0	0	0	0	0	0	0	0	0	0	0	0		2			0	2	32	1	2	2	0	1	0	0	1	0	0	0	0	0	0
1	2	1	3	4	3	2	2	5	2	42	10	0	2	0	5	20	10	0	2	2	5	0	0	5	3	1	2	2	0	2	2	0	1	3	1
1	2	1	5	7	3	2	2	1	0	7	6	0	0	0	2	0	0	0	0	0	5	5	0	0	5	1	1	2	0	2	25	1	1	3	0	1	0	0	1	0	0	0	0	0	0
1	2	1	5	7	2	2	2	1	0	0	3	0	4	0	0	20	0	0	0	0	2	0	0	2		2			0	2	49	1	1	2	0	1	0	0	1	0	0	0	0	0	0
1	2	2	4	7	1	1	3	1	0	8	0	0	0	0	0	0	20	0	2	3	0	0	0	0		2			0	3	3	0	2	3	1
1	2	1	3	2	1	4	1	1	0	0	0	0	0	0	0	0	0	0	1	0	0	0	0	0		2			0	2	23	1	1	2	0	1	0	0	0	0	0	0	0	0	0
1	2	1	3	5	3	2	2	1	0	0	0	0	0	0	0	0	0	0	1	0	0	0	0	0		1	1	2	0	2	7	0	1	7	1
1	2	2	3	5	3	4	2	1	0	2	2	0	0	0	0	0	0	0	0	1	3	3	0	0	5	1	2	2	0	2	7	0	2	3	1
1	2	1	2	5	3	2	2	4	0	7	2	0	0	0	0	0	0	0	2	1	1	0	1	0		2			1	2	13	0	1	3	1
1	2	2	4	7	3	2	2	1	0	7	12	0	1	0	2	0	0	0	1	0	4	4	0	0	5	1	1	3	1	2	14	0	2	3	1
1	1	2	5	7	1	2	2	1	0	4	2	0	0	0	0	0	0	0	2	0	0	0	0	0		2			0	2	9	0	2	3	1
1	2	2	4	7	1	2	1	1	0	15	2	0	0	0	0	0	0	0	2	0	0	0	0	0		2			0	2	19	1	2	2	0	1	0	0	0	0	0	0	0	0	0
1	2	2	3	7	2	2	2	1	0	6	10	0	2	0	0	15	0	0	1	2	4	4	0	0	5	1	1	2	0	2	45	1	2	2	0	1	0	0	0	1	0	0	0	0	0
2	2	1	5	7	1	4	1	1	0	0	0	0	0	0	0	0	0	0	0	0	0	0	0	0		2			0	3	1	0	1	3	1
1	2	2	5	6	1	2	2	1	0	20	0	0	2	0	1	0	0	0	2	1	1	1	0	0	3	1	1	2	0	2	13	0	1	3	1
1	1	1	4	7	1	2	2	1	0	0	0	0	0	0	0	0	0	0	1	0	0	0	0	0		2			0	2	11	0	1	3	1
1	2	1	3	7	3	2	2	1	0	5	6	0	1	0	5	0	0	0	1	0	2	2	0	0	5	1	1	2	1	2	15	1	1	3	0	1	0	0	0	0	0	0	0	0	0
1	2	1	3	7	2	2	2	1	0	1	1	0	1	0	3	0	0	0	0	1	6	0	0	6	5	1	1	2	0	3	15	1	1	3	0	1	0	0	0	0	0	0	0	0	0
1	2	1	3	7	1	2	2	1	0	0	2	0	0	0	0	0	0	0	0	0	4	4	0	0	5	1	1	2	0	2	7	0	1	3	1
1	1	1	1	7	1	1	3	1	0	0	0	0	0	0	0	0	0	0	0	0	0	0	0	0		2			0	2	3	0	1	3	1
3	2	1	1	7	3	4	2	5	0	0	0	0	0	0	0	0	0	0	2	0	0	0	0	0		2			0	2	29	1	1	2	0	1	0	0	0	0	0	0	0	0	0
1	2	1	4	7	1	2	2	1	0	0	10	0	0	0	0	0	0	0	4	0	0	0	0	0		1	1	1	0	2	39	1	1	2	0	1	0	0	0	0	0	0	0	0	0
1	2	1	5	5	3	2	2	4	0	0	3	0	0	0	0	0	0	0	5	0	0	0	0	0		2			0	2	29	1	1	2	0	1	0	0	0	0	0	0	0	0	0
1	1	1	5	3	1	4	1	1	0	5	0	0	0	0	0	0	0	0	1	1	0	0	0	0		2			0	2	8	0	1	3	1
1	2	1	3	6	1	4	2	1	0	0	11	1	1	0	0	10	0	0	3	2	0	0	0	0		2			0	2	7	0	1	3	1
1	2	2	4	7	1	2	2	1	0	12	15	0	0	0	0	0	0	0	1	1	0	0	0	0		2			1	2	30	1	2	1	0	1	0	0	0	0	0	0	0	0	0
1	1	1	1	7	1	4	1	4	0	20	14	0	0	0	0	0	0	0	1	3	1	1	0	0	5	1	1	3	0	2	37	1	1	2	0	1	0	1	1	0	0	0	0	0	1	3688	37	1	0
1	2	1	5	7	1	4	1	1	0	0	0	0	0	0	0	0	0	0	0	0	0	0	0	0		2			0	2	47	1	1	2	0	1	0	0	0	0	0	0	0	0	0
1	2	1	5	7	1	2	2	1	0	13	13	1	1	0	30	4	0	0	2	0	5	5	0	0	5	1	1	2	0	I	20	0	1	3	0	0
1	2	2	4	7	1	2	2	1	0	0	0	0	0	0	0	0	0	0	1	0	15	15	0	0	3	1	1	3	1	2	2	0	3	3	1
1	2	1	3	7	2	2	2	1	0	0	0	0	0	0	0	0	0	0	1	0	1	1	0	0	5	1	1	2	0	2	0		1	3	1
1	2	1	4	7	1	2	2	1	0	0	6	0	0	0	0	0	0	0	1	0	3	3	0	0	3	1	1	2	0	2	27	1	1	2	0	1	0	0	0	0	0	0	0	0	0
1	2	1	5	7	2	2	2	1	0	3	0	0	0	0	0	60	0	0	2	1	0	0	0	0		1	1	2	0	2	35	1	1	2	0	1	0	0	0	0	1	0	0	0	0
1	2	1	3	6	1	4	1	1	0	0	0	0	0	0	0	0	0	0	0	0	1	1	0	0	3	1	1	2	0	2	31	1	1	2	0	1	0	0	0	0	0	0	0	0	0
1	2	2	3	7	1	1	3	1	0	0	0	0	0	0	0	0	0	0	0	0	0	0	0	0		2			0	2	53	1	1	2	0	1	0	0	0	0	0	0	0	0	0
1	1	1	5	7	1	2	2	1	0	0	0	0	0	0	0	0	0	0	0	0	0	0	0	0		2			1	2	52	1	1	1	0	1	0	0	1	0	0	0	0	0	0
3	1	1	2	7	1	2	2	1	0	0	20	0	0	0	0	0	0	0	0	1	0	0	0	0		2			0	2	0		1	3	1
1	2	2	5	7	2	2	2	1	0	0	1	0	2	0	0	0	0	0	2	0	0	0	0	0		1	1	6	0	2	22	1	2	2	0	1	0	1	0	0	1	0	0	0	1	2831	22	1	0
1	2	2	4	7	1	1	3	1	0	0	0	0	0	0	0	0	0	0	0	0	0	0	0	0		2			1	2	36	1	1	3	0	1	0	0	0	1	0	0	1	0	1	1009	37	1	0
1	2	1	5	7	1	2	2	1	0	0	5	0	0	0	0	0	0	0	1	0	5	5	0	0	6	1	1	2	1	2	59	1	1	1	0	1	0	0	0	0	0	0	0	0	0
1	2	1	2	5	3	2	2	5	15	20	11	0	3	0	0	0	0	0	2	0	0	0	0	0		2			0	2	6	0	1	3	1
1	1	2	5	7	1	4	1	1	0	15	1	0	0	0	0	0	0	0	1	0	1	1	0	0	3	1	2	2	1	2	26	1	2	1	0	1	0	0	0	0	0	0	0	0	0
1	1	2	6	3	1	4	2	1	0	15	3	0	1	0	20	0	0	0	5	4	2	2	0	0	5	1	2	2	0	2	33	1	3	2	0	1	0	0	0	0	0	0	0	0	0
1	2	2	4	7	3	2	2	1	0	2	0	0	0	0	0	2	0	0	3	0	0	0	0	0		2			0	2	7	0	2	3	1
1	1	1	6	7	1	2	2	1	0	0	0	0	0	0	0	0	0	0	0	0	0	0	0	0		2			0	2	47	0	1	2	0	0
1	2	2	4	7	1	2	2	1	0	0	0	0	0	0	0	0	0	0	2	1	1	1	0	0	5	1	1	1	0	2	55	1	1	2	0	1	0	0	0	0	0	0	0	0	0
1	2	1	3	7	2	4	1	1	0	1	2	0	0	0	0	2	0	0	0	5	1	1	0	0	3	1	1	3	0	2	63	0	1	2	0	0
1	2	1	2	2	1	2	2	4	0	3	6	0	0	0	0	0	0	0	1	0	0	0	0	0		2			0	2	20	1	2	2	0	1	0	0	0	0	0	0	0	0	0
1	2	2	5	7	1	2	2	1	0	0	0	0	0	0	0	0	0	0	3	1	3	3	0	0	3	1	1	2	0	2	58	1	1	2	0	1	0	0	0	0	0	0	0	0	0
1	2	1	3	7	1	2	2	1	9	13	7	0	1	0	5	7	0	0	2	2	0	0	0	0		1	2	2	0	2	55	1	1	2	0	1	0	0	0	0	0	0	0	0	0
1	2	1	2	7	1	4	1	4	0	4	12	0	0	0	0	0	0	0	0	0	0	0	0	0		2			0	2	2	0	1	3	1
2	1	1	3	7	1	1	3	5	0	11	6	0	0	0	0	0	0	0	1	0	1	1	0	0	5	1	1	1	1	3	4	0	1	3	1
1	2	2	3	7	1	2	2	1	2	10	3	0	0	0	0	0	0	0	1	1	2	0	2	0	5	1	2	5	0	2	31	1	2	2	0	1	0	0	0	0	0	0	0	0	0
1	2	1	4	7	2	2	2	1	0	0	1	0	0	0	0	0	0	0	0	1	0	0	0	0		2			0	2	14	0	1	3	1
2	2	1	3	7	1	2	2	1	0	0	0	0	0	0	0	0	0	0	0	0	0	0	0	0		2			1	2	56	1	1	1	0	1	0	0	0	0	0	0	0	0	0
1	1	1	3	3	1	2	2	1	0	20	10	0	1	0	0	0	0	0	1	0	2	2	0	0	6	1	1	3	0	3	5	0	1	3	1
1	2	1	4	7	2	2	1	1	5	2	2	1	0	0	0	0	0	0	4	0	1	0	0	0		2			0	2	22	0	1	3	0	0
1	1	1	2	7	1	2	2	1	0	0	0	0	0	0	0	0	0	0	0	0	0	0	0	0		2			0	2	44	1	1	2	0	1	0	0	0	0	0	0	0	0	0
1	1	1	6	7	1	2	2	1	2	4	5	0	0	0	6	0	0	0	4	1	6	6	0	0	5	1	2	2	0	2	25	1	2	2	0	1	0	0	0	0	0	0	0	0	0
1	1	2	6	7	3	2	2	1	0	3	0	0	0	0	0	0	0	0	2	1	0	0	0	0		2			0	3	0		2	3	1
1	2	1	4	7	3	2	2	1	0	0	0	0	0	0	0	0	0	0	0	0	0	0	0	0		2			0	2	6	0	1	3	1
1	2	1	3	7	1	2	2	1	2	5	10	0	0	0	0	0	0	0	1	1	1	1	0	0	5	1	1	5	1	2	66	1	1	1	0	1	0	0	0	0	0	0	0	0	0
1	2	1	3	5	3	2	2	1	0	0	0	0	0	0	0	0	0	0	0	0	0	0	0	0		1	1	2	0	2	32	1	1	3	0	1	0	0	1	0	0	0	0	0	0
1	2	1	4	7	1	2	2	1	0	0	0	0	0	0	0	0	0	0	2	1	0	0	0	0		2			0	2	57	1	1	3	0	1	0	0	0	0	0	0	0	0	0
1	2	1	3	2	1	2	2	4	0	4	0	0	1	0	0	0	0	0	2	0	0	0	0	0		2			0	2	7	0	1	3	1
1	1	1	4	7	1	2	2	1	0	0	0	0	0	0	0	0	0	0	0	0	1	1	0	0	6	1	1	2	0	3	4	0	1	3	1
1	2	2	5	6	1	4	2	1	0	0	0	0	0	0	0	0	0	0	1	1	1	0	1	0	3	1	2	2	1	2	45	1	1	1	0	1	0	0	0	0	0	0	0	0	0
1	2	1	6	7	2	2	2	1	0	15	6	0	2	0	0	30	30	0	3	0	4	0	0	4	3	1	2	2	0	2	45	1	1	3	0	1	0	0	0	0	0	0	0	0	0
1	2	1	2	7	1	4	1	1	0	5	0	0	0	0	0	0	0	0	0	1	0	0	0	0		2			0	2	2	0	1	3	1
1	2	1	3	2	1	2	2	4	0	4	0	0	0	0	0	0	0	0	0	2	0	0	0	0		2			0	2	24	1	1	2	0	1	0	0	1	0	0	0	1	0	1	3658	25	1	0
1	2	2	3	7	1	2	2	1	0	6	14	0	0	0	0	0	0	0	2	2	9	0	0	9		2			1	2	26	1	2	1	0	1	0	0	0	0	0	0	0	0	0
1	2	2	3	7	3	4	1	1	0	7	0	0	0	0	0	0	0	0	1	0	0	0	0	0		2			0	2	0		2	3	1
1	2	1	2	2	1	4	1	1	0	0	0	0	0	0	0	0	0	0	1	0	0	0	0	0		2			1	2	20	1	1	3	0	1	0	0	0	0	0	0	0	0	0
1	2	1	5	4	3	2	2	5	6	14	2	0	0	0	0	20	5	0	0	0	5	0	0	5	3	1	2	2	0	2	0		1	3	1
1	2	1	3	5	2	4	1	1	0	1	1	0	0	0	0	0	0	0	1	0	0	0	0	0		2			0	2	30	1	1	2	0	1	0	0	0	0	0	0	0	0	0
1	2	1	2	7	2	2	2	1	0	8	0	0	0	0	0	5	0	0	1	0	3	3	0	0	5	1	1	2	0	2	14	0	1	3	1
1	2	2	4	7	1	4	1	1	0	0	0	0	0	0	0	0	0	0	0	0	0	0	0	0		2			0	2	28	1	2	2	0	1	0	0	0	0	0	0	0	0	0
1	1	1	5	7	1	2	2	1	0	20	0	0	0	0	0	0	0	0	1	0	0	0	0	0		2			0	2	37	1	1	2	0	1	0	0	0	0	0	0	0	0	0
1	2	1	2	7	1	1	3	1	0	1	1	0	0	0	0	0	0	0	1	0	0	0	0	0		1	2	3	0	2	60	1	1	2	0	1	0	0	0	0	1	0	0	0	0
1	2	1	3	7	1	1	3	1	0	0	8	0	0	0	0	0	0	0	1	2	0	0	0	0		2			0	2	9	0	1	3	1
1	2	1	3	5	3	4	1	1	1	25	2	0	3	0	0	0	12	0	2	1	2	2	0	0	5	1	2	2	1	2	35	1	1	1	0	1	0	0	0	0	0	0	0	0	0
1	2	1	2	7	2	2	2	1	0	2	0	0	1	0	0	0	0	0	2	0	2	2	0	0		2			1	2	4	0	1	3	1
3	2	1	3	6	1	2	2	4	0	0	0	0	0	0	0	0	0	0	0	0	1	0	1	0	5	1	2	3	0	2	27	1	1	3	0	1	0	0	0	0	0	0	0	0	0
1	1	1	4	7	1	4	1	1	0	0	0	0	0	0	0	0	0	0	0	0	0	0	0	0		1	2	2	0	2	46	1	1	2	0	1	0	0	0	0	0	0	0	0	0
1	3	1	5	7	1	2	2	1	7	0	12	0	0	0	0	0	0	0	0	0	0	0	0	0		2			1	2	59	1	1	1	0	1	0	0	0	0	0	0	0	0	0
1	2	1	3	5	3	4	1	1	2	0	0	0	0	0	0	0	0	0	0	0	2	2	0	0	5	1	2	2	1	2	36	1	1	1	0	1	0	0	0	0	0	0	0	0	0
1	1	1	4	7	1	2	2	1	0	0	0	0	0	0	0	0	0	0	0	0	0	0	0	0		2			1	2	11	0	1	3	1
1	2	2	7	3	1	2	2	1	0	10	25	0	0	0	0	0	0	0	2	2	3	3	0	0	5	1	1	2	0	2	21	1	3	3	0	1	0	0	0	0	0	0	0	0	0
1	2	1	3	7	1	2	2	1	0	28	0	0	0	0	0	0	0	0	0	0	0	0	0	0		2			0	2	44	1	1	2	0	1	0	0	0	0	0	0	0	0	0
1	2	2	4	7	2	2	2	1	0	5	2	0	0	0	0	0	0	0	0	0	0	0	0	0		2			0	2	32	1	2	3	0	1	0	0	0	0	0	0	0	0	0
2	2	1	2	7	1	1	3	1	0	0	0	0	0	0	0	0	0	0	0	1	0	0	0	0		2			0	2	4	0	1	3	1
1	2	1	3	7	1	1	3	1	0	2	2	0	0	0	0	0	0	0	1	1	0	0	0	0		1	2	3	1	2	33	1	1	1	0	1	0	0	0	0	0	0	0	0	0
1	1	1	4	7	1	2	2	1	0	0	0	0	0	0	0	0	0	0	1	0	0	0	0	0		2			1	2	11	0	1	3	1
1	2	2	5	7	1	2	2	1	0	3	0	0	0	0	2	0	0	0	3	2	0	0	0	0		2			0	2	9	0	1	3	1
1	2	1	2	7	1	2	2	5	0	0	5	0	0	0	0	0	0	0	2	2	0	0	0	0		2			0	2	5	0	1	3	1
1	2	1	3	6	1	2	2	1	0	2	4	0	1	0	0	0	0	0	0	0	0	0	0	0		1	1	6	0	2	24	1	1	3	0	1	0	0	0	0	0	0	0	0	0
1	2	1	4	7	1	2	2	1	0	30	8	0	0	0	0	0	0	0	0	0	0	0	0	0		2			0	2	9	0	1	3	1
3	2	1	2	7	1	4	1	4	0	0	6	0	0	0	0	0	0	0	1	0	0	0	0	0		2			0	2	40	1	1	2	0	1	0	1	1	0	0	0	0	0	1	343	41	1	0
1	2	1	4	6	1	4	1	4	0	16	4	0	3	0	0	20	0	0	0	1	8	0	0	8	5	1	2	2	0	2	71	1	1	2	0	1	0	0	0	0	0	0	0	0	0
1	2	1	2	5	3	4	1	1	0	5	0	0	2	0	0	20	0	0	3	0	3	0	0	0		2			0	2	45	1	1	2	0	1	0	0	0	0	0	0	0	0	0
3	2	2	3	5	3	2	2	5	0	0	0	0	0	0	0	0	0	0	0	0	0	0	0	0		2			1	2	40	1	1	V	0	1	0	0	0	0	0	0	0	0	0
1	2	1	6	3	3	2	2	1	0	7	0	0	0	0	2	0	0	0	1	0	0	0	0	0		2			0	2	42	1	1	2	0	1	0	0	1	0	0	0	0	0	0
1	1	1	3	7	1	2	2	4	0	30	2	0	0	0	0	0	0	0	1	0	0	0	0	0		1	2		0	2	40	1	1	2	0	1	0	0	0	0	0	0	0	0	0
1	2	1	4	7	1	4	1	1	0	0	20	0	0	0	0	0	0	0	5	2	15	0	0	15	5	1	1	2	0	2	37	1	1	2	0	1	0	0	0	0	0	0	0	0	0
1	2	2	4	6	1	4	1	4	0	0	0	0	0	0	0	0	0	0	1	0	0	0	0	0		2			0	2	25	1	1	2	0	1	1	0	1	0	0	0	0	0	1	1070	26	4
1	1	1	4	7	1	4	2	1	0	100	0	0	0	0	0	0	0	0	2	0	7	2	0	5	5	1	1	1	0	2	36	1	1	2	0	1	0	0	0	0	0	0	0	0	0
1	2	1	4	5	3	2	2	4	0	30	0	0	1	0	0	0	0	0	9	0	0	0	0	0		2			0	2	25	1	1	2	0	1	0	0	0	0	0	0	0	0	0
1	2	1	5	7	1	2	2	1	1	4	10	0	1	0	4	0	5	0	0	0	2	2	0	0	5	1	1	2	0	2	25	1	1	3	0	1	0	0	0	0	0	0	0	0	0
1	2	1	3	7	1	4	1	4	0	10	0	0	0	0	0	0	0	0	1	0	2	2	0	0	5	1	1	2	0	2	37	1	1	2	0	1	0	0	0	0	0	0	0	0	0
1	2	1	3	7	1	1	3	5	1	2	0	0	0	0	0	0	0	0	1	0	0	0	0	0		2			1	2	19	1	1	1	0	1	0	0	0	0	0	0	0	0	0
1	2	2	3	5	3	4	1	4	0	0	0	0	0	0	0	0	0	0	0	0	0	0	0	0		1	2	3	1	2	26	1	2	1	0	1	0	0	0	0	0	0	0	0	0
1	2	1	4	7	1	1	3	1	0	3	23	0	0	0	0	0	0	0	0	0	0	0	0	0		2			0	2	12	0	1	3	1
1	2	1	5	5	3	2	2	4	0	0	3	0	0	0	0	0	0	0	5	0	0	0	0	0		2			0	2	12	0	1	3	1
2	1	1	3	7	1	2	2	1	0	0	0	0	0	0	0	0	0	0	0	1	0	0	0	0		2			0	2	7	0	1	3	1
1	1	1	3	7	1	2	2	1	0	4	10	0	0	0	0	0	0	0	0	1	1	1	0	0	3	1	1	3	0	2	77	1	1	2	0	1	0	0	0	0	0	0	0	0	0
1	2	1	6	7	1	2	2	1	0	0	3	0	0	0	0	0	0	0	0	1	0	0	0	0		2			0	2	15	1	1	3	0	1	0	0	0	0	0	0	0	0	0
1	1	1	4	7	1	2	2	1	0	0	0	0	0	0	0	0	0	0	0	0	0	0	0	0		1	2	3	0	2	10		1	3	1
1	2	1	3	7	1	1	3	1	0	0	0	0	0	0	0	0	0	0	0	0	10	10	0	0	5	1	1	1	0	2	21	1	1	3	0	1	0	0	0	0	0	0	0	0	0
1	2	1	2	7	1	4	1	1	0	0	2	0	0	0	0	0	0	0	0	0	0	0	0	0		2			0	2	42	1	1	2	0	1	0	1	1	0	0	0	0	0	1	3614	43	1	0
1	2	2	3	6	1	2	2	5	0	0	9	0	0	0	0	0	0	0	0	0	0	0	0	0		2			0	3	8	0	1	3	1
1	1	1	5	7	1	1	3	1	0	0	0	0	0	0	0	1	0	0	0	0	0	0	0	0		2			1	2	16	1	1	3	0	1	0	0	0	0	0	0	0	0	0
1	2	1	3	7	3	2	2	1	0	5	0	0	0	0	0	0	0	0	1	1	0	0	0	0		2			0	2	29	1	1	2	0	1	0	0	0	0	0	0	0	0	0
1	2	1	4	6	1	2	1	4	0	4	0	0	0	0	0	0	0	0	0	0	0	0	0	0		2			0	2	2	0	1	3	1
1	2	2	3	7	2	2	2	1	0	10	3	2	4	0	4	50	0	0	1	0	4	0	0	0		2			1	2	59	1	1	1	0	1	0	0	0	0	0	0	0	0	0
1	2	1	4	7	1	2	2	1	1	2	0	0	1	0	3	2	0	0	2	0	1	1	0	0	5	1	1	3	0	2	9	0	1	3	1
1	2	1	2	7	2	4	2	1	0	0	5	0	3	0	0	0	0	0	0	0	0	0	0	0		2			0	2	10	0	1	3	1
1	2	2	4	6	1	2	1	1	0	0	0	0	0	0	0	0	0	0	2	3	0	0	0	0		2			0	2	26	1	2	2	0	1	0	0	0	0	0	0	0	0	0
1	2	1	4	3	1	2	2	1	0	10	0	0	0	0	0	0	0	0	0	4	4	4	0	0	3	1	2	2	0	2	4	0	1	3	1
1	2	2	5	7	1	2	2	1	2	16	6	4	0	0	6	0	0	0	1	0	0	0	0	0		2			0	2	11	0	1	3	1
1	2	1	4	2	1	1	3	1	0	10	8	0	0	0	0	0	0	0	0	0	0	0	0	0		2			0	2	47	1	1	2	0	1	0	0	0	0	0	0	0	0	0
1	2	2	5	2	1	4	1	1	0	0	0	0	0	0	0	0	0	0	0	0	0	0	0	0		2			0	2	20	1	2	2	0	1	0	0	0	0	0	0	0	0	0
1	1	1	3	7	1	1	3	1	0	0	0	0	0	0	0	0	0	0	0	0	0	0	0	0		1	2	4	0	2	0		1	3	1
1	2	1	5	7	1	2	2	1	0	0	0	0	1	0	0	0	0	0	4	1	4	4	0	0	3	1	2	2	1	2	11	0	1	3	1
1	2	2	5	5	3	2	2	1	10	8	5	1	1	0	6	4	0	0	2	1	3	0	0	3	5	1	3	2	1	2	3	0	2	3	1
2	1	1	2	6	1	2	1	1	0	0	0	0	0	0	0	0	0	0	1	0	0	0	0	0		2			0	2	9	0	1	3	1
1	2	1	4	6	1	2	2	4	0	20	15	0	0	0	0	0	0	0	2	1	2	2	0	0	5	1	1	2	0	2	38	1	1	2	0	1	0	0	0	0	0	0	0	0	0
1	1	1	6	7	1	2	2	1	0	0	6	0	0	0	0	0	0	0	1	1	10	10	0	0	5	1	1	3	0	3	15	1	1	3	0	1	0	0	0	0	0	0	0	0	0
1	2	1	2	6	1	4	2	4	4	0	0	0	0	0	0	0	0	0	0	0	2	2	0	0	5	1	1	2	0	2	33	1	1	2	0	1	0	0	0	0	0	0	0	0	0
1	2	1	3	7	1	4	1	1	0	0	0	0	0	0	0	0	0	0	0	0	0	0	0	0		2			0	2	9	0	1	3	1
1	1	2	2	7	1	2	2	5	0	15	0	0	0	0	0	0	0	0	2	0	1	0	0	1		2			0	2	1	0	2	3	1
1	2	1	1	6	1	4	1	5	0	0	0	0	0	0	0	0	0	0	1	0	0	0	0	0		2			0	2	38	1	1	2	0	1	0	0	0	0	0	0	0	0	0
1	2	1	3	7	1	2	2	1	0	5	0	0	0	0	0	0	0	0	1	0	0	0	0	0		2			1	2	9	0	1	3	1
1	2	1	4	7	1	2	2	1	0	10	3	0	0	0	0	0	0	0	2	2	2	2	0	0	5	1	2	2	1	2	4	0	1	3	1
1	2	1	3	7	1	4	2	1	0	10	0	0	0	0	0	0	0	0	1	0	0	0	0	0		2			1	2	22	0	1	3	0	0
1	2	1	3	6	1	2	2	4	1	0	2	0	0	0	0	0	0	0	2	0	0	0	0	0		2			0	2	3	0	1	3	1
1	1	1	4	7	1	4	1	1	0	0	0	0	0	0	0	0	0	0	3	0	0	0	0	0		2			0	2	50	1	1	2	0	1	0	0	0	0	0	0	0	0	0
1	2	1	3	7	1	2	2	1	4	3	5	0	1	0	0	0	0	0	1	1	2	0	0	2	4	1	2	2	0	2	14	0	1	3	1
1	2	2	4	7	2	2	2	1	0	5	0	0	1	0	0	7	0	0	0	2	0	0	0	0		2			0	2	31	1	2	2	0	1	0	0	0	0	0	0	0	0	0
1	2	1	3	7	1	2	2	1	0	10	12	0	0	0	0	0	0	0	1	0	3	3	0	0	5	1	1	6	0	2	5	0	1	3	1
1	2	1	3	7	1	4	2	1	0	10	0	0	0	0	0	0	0	0	1	0	0	0	0	0		2			1	2	46	1	1	1	0	1	0	0	0	0	0	0	0	0	0
1	2	1	5	7	2	2	2	1	0	9	0	0	1	0	0	100	2	0	2	1	0	0	0	0		2			0	2	46	1	1	2	0	1	0	0	0	0	0	0	0	0	0
1	2	2	5	7	2	2	2	1	8	10	7	0	2	0	0	10	0	0	5	0	12	4	0	8	6	1	2	2	1	2	72	1	1	1	0	1	0	0	0	0	0	0	0	0	0
1	2	2	4	7	2	2	2	1	4	0	0	0	0	0	0	10	0	0	3	1	5	5	0	0	5	1	2	2	0	2	23	1	2	2	0	1	0	0	0	0	0	0	0	0	0
1	2	2	4	5	3	2	2	1	1	4	4	0	2	0	0	0	2	0	2	1	1	1	0	0	5	1	1	3	0	2	38	1	2	2	0	1	0	0	0	0	0	0	0	0	0
1	2	1	4	5	3	1	3	1	0	2	3	0	0	0	0	0	0	0	0	1	13	13	0	0	5	1	2	2	0	2	39	1	1	2	0	1	0	0	0	0	0	0	0	0	0
1	2	1	5	7	2	2	2	1	0	0	3	0	4	0	0	20	0	0	0	0	2	0	0	2		2			0	2	16	1	1	3	0	1	0	0	0	0	0	0	0	0	0
1	2	2	4	7	2	2	2	1	0	2	0	0	0	0	0	0	0	0	1	0	3	3	0	0	5	1	1	2	0	2	29	1	2	2	0	1	0	0	0	0	0	0	0	0	0
1	2	1	3	7	1	2	2	1	7	4	0	0	0	0	0	0	0	0	0	0	0	0	0	0		2			1	2	0		1	3	1
1	2	1	4	7	1	1	3	1	0	0	0	0	0	0	0	0	0	0	0	1	0	0	0	0		2			0	2	43	1	1	2	0	1	0	0	0	0	0	0	0	0	0
1	2	1	5	7	1	1	3	1	0	0	0	0	0	0	0	0	0	0	0	1	0	0	0	0		2			0	2	52	1	1	2	0	1	0	0	0	0	0	0	0	0	0
1	2	1	4	7	3	2	2	1	0	7	0	0	1	0	0	20	15	0	3	2	1	1	0	0	6	1	1	2	0	2	71	1	1	2	0	1	0	0	0	0	0	0	0	0	0
1	2	1	3	3	1	4	1	1	4	6	0	4	1	0	2	10	0	0	1	1	1	1	0	0	6	1	1	6	0	2	12	0	1	3	1
1	2	1	3	7	3	2	2	5	0	3	2	0	0	0	0	0	0	0	1	0	11	0	0	0		2			0	2	31	1	1	2	0	1	0	0	0	0	0	0	0	0	0
1	2	2	4	7	2	2	2	1	0	1	1	0	0	0	0	0	0	0	0	0	1	0	0	0		2			0	2	13	0	1	3	1
1	2	1	4	7	2	2	2	1	0	2	0	0	0	0	0	0	0	0	0	0	0	0	0	0		2			0	2	68	1	1	2	0	1	0	0	0	0	0	0	0	0	0
1	2	1	4	7	3	2	2	1	0	20	5	3	0	0	10	14	0	0	1	1	6	0	0	6	5	1	3	2	0	2	8	0	1	3	1
1	2	1	3	7	2	2	2	1	2	4	0	0	0	0	0	2	0	0	1	1	8	0	0	8	5	1	2	2	0	2	49	1	1	2	0	1	0	0	0	0	0	0	0	0	0
1	2	1	3	7	1	2	2	1	0	0	1	0	0	0	0	0	0	0	0	0	0	0	0	0		2			0	2	4	0	1	3	1
1	2	1	4	6	2	4	1	5	0	6	0	0	3	0	0	3	0	0	2	1	8	0	0	8	5	1	1	2	0	2	0		1	3	1
1	1	1	5	7	1	2	2	1	0	16	27	0	0	0	0	0	0	0	3	0	0	0	0	0		2			0	2	38	1	1	2	0	1	0	0	0	0	0	0	0	0	0
1	2	2	2	7	1	2	2	5	0	4	0	0	0	0	0	0	0	0	1	1	0	0	0	0		2			0	2	6	0	1	3	1
1	2	2	2	5	3	4	1	4	0	2	0	0	0	0	0	0	0	0	0	0	0	0	0	0		2			0	2	27	1	2	2	0	1	0	0	0	0	0	0	0	0	0
1	2	1	3	7	1	2	2	5	0	9	8	0	0	0	0	0	0	0	1	0	2	2	0	0	3	1	1	2	0	2	64	1	1	4	0	1	0	0	0	0	0	0	0	0	0
1	2	1	4	7	1	2	2	1	0	0	0	0	0	0	2	0	0	0	1	1	4	4	0	0	5	1	2	2	0	2	7	0	1	3	1
1	1	1	5	7	1	1	3	1	0	0	0	0	0	0	0	0	0	0	1	0	0	0	0	0		2			0	2	13	0	1	3	1
1	2	1	3	6	1	2	2	4	0	0	7	0	0	0	0	0	0	0	0	0	2	2	0	0	3	1	1	3	0	2	7	0	1	3	1
2	2	1	3	6	1	1	3	1	7	15	10	0	0	0	0	0	3	0	2	0	2	0	2	0	6	1	1	2	0	2	39	1	1	2	0	1	0	0	0	0	0	0	0	0	0
1	2	2	4	7	2	2	2	1	4	0	0	0	0	0	0	10	0	0	3	1	5	5	0	0	5	1	2	2	0	2	4	0	2	3	1
1	2	2	3	7	1	2	2	1	0	0	0	0	0	0	0	0	0	0	0	0	0	0	0	0		2			0	2	2	0	2	3	1
1	2	2	4	3	1	2	2	1	0	2	5	0	1	0	0	4	0	0	2	3	18	0	0	18	5	1	1	2	1	2	25	0	3	1	0	0
2	2	1	4	6	1	2	2	5	12	0	0	0	0	0	0	0	0	0	1	0	0	0	0	0		2			0	2	1	0	1	3	1
1	1	2	7	7	1	1	3	1	0	0	20	0	0	0	0	0	0	0	10	0	4	4	0	0	5	1	1	1	1	2	27	1	1	3	0	1	0	0	0	0	0	0	0	0	0
1	1	2	4	7	1	2	2	1	0	0	0	0	0	0	0	0	0	0	0	0	0	0	0	0		2			0	2	4	0	1	3	1
1	1	1	3	7	1	2	2	1	0	0	0	0	0	0	0	0	0	0	2	0	2	2	0	0	3	1	1	2	0	2	6	0	1	3	1
1	2	1	3	2	1	2	2	4	0	4	0	0	0	0	0	0	0	0	0	2	0	0	0	0		2			1	2	3	0	1	3	1
1	2	1	4	7	1	2	2	1	0	2	4	0	0	0	0	0	0	0	0	3	0	0	0	0		2			1	3	0		1	3	1
1	1	1	4	7	1	1	3	1	0	0	0	0	0	0	0	0	0	0	0	0	0	0	0	0		2			0	2	19	1	1	2	0	1	0	0	0	0	0	0	0	0	0
1	2	1	4	7	2	2	2	1	0	0	0	0	0	0	0	0	0	0	1	1	0	0	0	0		2			0	2	4	0	1	3	1
1	2	2	5	4	1	4	1	5	0	12	0	0	2	0	0	16	0	0	4	1	3	0	0	3	3	1	1	2	0	2	11	0	1	3	1
1	2	1	3	5	2	4	2	4	0	0	0	0	0	0	0	0	0	0	1	0	0	0	0	0		2			1	2	5	0	1	8	1
1	1	1	2	6	1	1	1	1	0	8	0	0	0	0	0	0	0	0	0	1	1	1	0	0	3	1	2	2	0	2	1	0	1	3	1
1	1	1	3	5	3	4	1	1	0	4	0	0	0	0	0	0	0	0	0	0	1	1	0	0	5	1	2	6	0	2	11	0	1	3	1
1	2	1	4	7	1	4	1	1	0	10	0	0	0	0	0	0	0	0	1	1	0	0	0	0		2			1	2	14	0	1	3	1
2	2	1	2	7	1	1	3	1	0	0	0	0	0	0	0	0	0	0	0	0	0	0	0	0		2			0	2	8	0	1	3	1
1	2	1	3	7	2	2	2	1	0	0	0	0	0	0	0	0	0	0	2	0	0	0	0	0		2			1	2	18	0	1	3	0	0
1	2	1	3	7	1	2	2	1	6	2	3	0	1	0	0	0	0	0	1	1	2	2	0	0	6	1	1	2	1	2	59	1	1	5	0	1	0	1	0	0	0	0	0	0	1	2094	60	1	1
1	2	1	6	7	1	2	2	1	5	9	3	0	0	0	0	0	0	0	1	1	0	0	0	0		2			1	2	39	1	1	3	0	1	0	0	0	0	0	0	0	0	0
1	2	2	4	4	3	2	2	1	0	10	3	1	10	0	4	300	0	0	4	1	20	0	0	20	5	1	1	2	0	2	70	1	1	5	0	1	0	0	0	0	0	0	0	0	0
1	2	1	3	7	1	2	2	1	0	0	0	0	0	0	0	0	0	0	0	0	0	0	0	0		2			0	2	33	1	1	2	0	1	0	0	0	0	0	0	0	0	0
1	1	1	3	6	1	1	3	1	0	20	6	0	0	0	0	0	0	0	0	0	0	0	0	0		1	2	2	0	2	6	0	1	3	1
1	2	1	4	7	1	2	2	1	0	10	12	0	0	0	0	0	0	0	2	0	0	0	0	0		2			0	2	6	0	1	3	1
1	2	1	4	7	2	2	1	1	0	4	0	4	1	0	3	12	0	0	1	0	2	0	0	0		2			1	2	18	1	1	3	0	1	0	0	0	0	0	0	0	0	0
1	2	1	4	6	1	2	2	4	0	0	0	0	0	0	0	0	0	0	0	0	3	3	0	0	5	1	1	3	0	2	39	1	1	2	0	1	0	0	0	0	0	0	0	0	0
1	2	1	3	7	1	2	2	1	0	7	2	0	1	0	0	0	0	0	1	2	2	2	0	0	5	1	1	2	0	2	63	1	1	2	0	1	0	0	0	0	0	0	0	0	0
3	2	1	3	7	1	2	2	1	0	10	0	0	0	0	0	0	0	0	0	0	0	0	0	0		2			0	2	18	1	1	3	0	1	0	0	0	0	0	0	0	0	0
1	1	1	4	7	1	2	2	1	2	0	0	0	0	0	0	0	0	0	1	0	0	0	0	0		2			0	2	45	1	1	2	0	1	0	0	0	0	0	0	0	0	0
1	2	2	4	5	2	2	2	1	0	8	4	0	0	0	0	0	0	0	1	1	2	2	0	0	5	1	1	2	0	2	19	1	2	2	0	1	0	0	0	0	0	0	0	0	0
1	2	1	3	7	2	2	2	1	0	0	0	0	0	0	0	0	0	0	1	1	0	0	0	0		1	1	4	0	2	5	0	1	3	1
1	2	1	3	7	1	1	3	1	0	20	0	0	0	0	0	0	0	0	0	0	6	6	0	0	3	1	1	1	1	2	51	1	1	1	0	1	0	0	0	0	0	0	0	0	0
1	2	1	4	5	3	4	1	1	0	20	0	0	4	0	0	0	0	0	1	0	1	0	0	1	6	1	1	2	1	2	65	1	1	1	0	1	0	0	0	0	0	0	0	0	0
1	2	1	2	7	1	4	1	5	0	4	2	0	0	0	0	0	0	0	3	1	8	8	0	0	6	1	1	3	1	2	5	0	1	3	1
1	2	1	2	5	3	4	1	1	0	20	0	0	1	0	0	6	0	0	2	0	3	0	0	3		2			1	2	32	0	1	1	0	0
1	2	1	3	7	2	2	2	1	0	2	0	0	0	0	0	10	0	0	0	0	5	0	0	0		2			0	2	0		1	3	1
1	2	1	3	7	2	2	2	1	0	0	0	0	0	0	0	4	0	0	0	0	1	1	0	0	3	1	1	2	0	2	2	0	1	3	1
1	1	2	3	7	1	2	2	1	0	0	0	0	0	0	0	0	0	0	0	0	0	0	0	0		2			0	2	6	0	1	3	1
1	2	1	5	7	1	1	3	1	0	0	0	0	0	0	0	0	0	0	0	0	0	0	0	0		1	1	1	0	3	0		1	3	1
1	2	1	3	7	1	2	2	1	0	42	0	0	0	0	0	0	0	0	0	0	0	0	0	0		2			0	2	9	0	1	3	1
1	2	1	2	6	1	4	1	4	0	0	0	0	0	0	0	0	0	0	0	0	0	0	0	0		1	2	2	0	2	13	0	1	3	1
1	2	1	6	7	1	1	3	1	0	4	2	0	0	0	0	0	0	0	1	5	0	0	0	0		2			1	2	6	0	1	3	1
1	2	1	3	7	1	2	2	1	0	3	1	0	0	0	0	0	0	0	1	0	4	4	0	0	6	1	1	2	0	2	2	0	1	3	1
1	2	1	5	7	1	1	3	1	0	0	0	0	0	0	0	0	0	0	0	0	0	0	0	0		1	3	2	1	2	53	1	1	4	0	1	0	0	0	0	0	0	0	0	0
1	2	1	5	7	2	2	2	1	0	11	0	0	1	0	0	0	0	0	2	1	12	12	0	0	5	1	1	2	0	2	10	0	2	3	1
1	2	1	2	7	1	2	2	1	0	0	0	0	0	0	0	0	0	0	1	0	0	0	0	0		2			0	3	4	0	1	3	1
1	2	2	6	3	2	1	3	1	0	0	0	0	3	0	0	0	0	0	3	0	0	0	0	0		2			0	2	12	0	1	8	1
1	2	1	4	5	2	2	2	1	0	12	3	0	0	0	0	0	0	0	0	0	1	0	0	0		2			0	2	5	0	1	3	1
1	1	1	3	7	1	2	1	1	0	0	0	0	0	0	0	0	0	0	1	0	1	0	0	1	3	1	2	2	0	2	7	0	1	3	1
1	2	1	3	2	4	2	1	4	0	7	7	0	0	0	0	0	0	0	0	0	1	1	0	0	3	1	3	2	0	2	4	0	1	3	1
1	2	1	2	6	1	4	1	1	0	0	0	0	0	0	0	0	0	0	0	0	0	0	0	0		2			0	2	7	0	1	3	1
3	2	1	4	7	1	1	3	1	0	20	0	0	0	0	0	0	0	0	1	1	1	1	0	0	5	1	1	2	0	3	9	0	1	3	1
1	2	1	5	7	3	4	1	1	1	1	0	0	0	0	0	0	0	0	1	0	1	0	0	0		2			1	2	9	0	1	3	1
3	2	1	3	7	1	2	2	1	0	18	0	0	0	0	0	0	0	0	0	0	2	2	0	0	5	1	1	2	1	2	15	1	1	3	0	1	0	0	0	0	0	0	0	0	0
1	2	1	3	7	3	2	2	1	0	0	0	0	0	0	0	0	0	0	2	0	2	2	0	0	3	1	1	6	0	2	7	0	1	3	1
1	2	1	2	6	1	2	2	4	0	0	1	0	0	0	0	0	0	0	0	0	0	0	0	0		2			0	2	6	0	1	3	1
1	2	1	5	7	2	2	2	4	0	0	0	0	0	0	0	0	0	0	1	0	4	0	0	4	5	1	1	2	0	2	1	0	1	3	1
1	2	2	4	7	2	2	2	1	1	1	0	0	0	0	1	2	0	0	0	2	20	0	0	20	5	1	2	6	0	2	18	1	1	3	0	1	0	0	0	0	0	0	0	0	0
1	2	1	2	6	1	4	3	4	0	0	3	0	0	0	0	0	0	0	1	0	0	0	0	0		2			0	2	1	0	1	3	1
1	2	1	3	7	3	2	2	1	0	4	10	0	1	0	0	0	0	0	1	1	4	4	0	0	5	1	1	2	0	2	2	0	1	3	1
1	2	1	4	7	2	1	3	1	12	0	0	3	0	0	10	0	0	0	2	0	14	0	0	14		2			0	2	9	0	1	8	1
1	2	1	3	7	1	2	2	1	0	0	8	0	0	0	0	0	0	0	0	0	0	0	0	0		2			1	2	41	1	1	1	0	1	0	0	0	0	0	0	0	0	0
1	2	1	3	4	3	4	1	5	0	22	8	0	0	0	0	3	0	0	1	0	2	2	0	0	5	1	1	2	0	2	5	0	1	3	1
3	2	1	1	2	1	4	1	4	0	3	1	0	0	0	0	0	0	0	1	0	1	0	1	0		2			0	2	0		1	3	1
1	2	1	2	7	2	4	1	1	0	0	0	0	0	0	0	0	0	0	2	1	0	0	0	0		2			0	2	0		1	3	1
1	2	1	3	7	2	2	2	1	0	17	0	0	3	0	0	7	0	0	0	0	12	0	0	12		2			0	2	8	0	1	3	1
1	2	1	5	7	2	2	2	1	0	2	0	0	1	0	0	0	0	0	3	0	2	0	0	0		2			0	2	55	1	1	2	0	1	0	0	0	0	0	0	0	0	0
1	2	2	3	4	1	4	1	4	5	15	15	0	1	0	0	0	0	0	2	0	2	0	2	0		2			1	2	51	1	1	1	0	1	0	0	0	0	0	0	0	0	0
1	1	1	4	7	1	2	2	1	0	0	6	0	0	0	0	0	0	0	0	0	1	0	1	0		2			0	2	42	1	1	2	0	1	0	0	0	0	0	0	0	0	0
1	2	1	3	7	1	1	3	1	0	15	0	0	0	0	0	0	0	0	1	0	0	0	0	0		2			0	2	5	0	1	3	1
1	2	1	4	7	1	1	3	1	0	0	4	0	0	0	0	0	0	0	0	0	0	0	0	0		2			1	2	98	1	1	1	0	1	0	0	0	0	0	0	0	0	0
1	2	1	3	7	2	2	2	1	0	0	0	0	0	0	0	0	0	0	1	4	6	6	0	0	3	1	2	2	0	2	7	0	1	3	1
1	1	1	6	7	2	2	2	1	0	0	0	0	0	0	0	0	0	0	10	0	0	0	0	0		2			1	7	11	0	1	3	1
1	2	1	4	7	2	2	2	1	0	6	2	0	0	0	0	7	0	0	2	1	6	0	0	6	5	1	1	2	0	3	5	0	1	3	1
3	1	1	2	7	1	2	2	1	0	2	10	0	0	0	0	0	0	0	2	2	3	3	0	0	5	1	1	2	0	2	5	0	1	3	1
1	2	1	3	7	2	4	1	1	0	0	0	0	0	0	0	0	0	0	0	0	0	0	0	0		2			1	2	32	1	1	1	0	1	0	0	0	0	0	0	0	0	0
1	1	1	4	7	1	1	3	1	0	20	14	0	0	0	0	0	0	0	1	0	0	0	0	0		1	1	1	0	2	10	0	1	3	1
1	2	1	3	7	3	4	2	5	0	20	7	0	0	0	0	0	0	0	0	0	0	0	0	0		2			1	2	29	0	1	1	0	0
1	1	1	3	6	1	1	3	1	0	0	0	0	0	0	0	0	0	0	0	0	0	0	0	0		2			0	2	21	1	1	2	0	1	0	0	0	0	0	0	0	0	0
1	2	1	4	7	1	1	3	1	0	5	13	0	0	0	0	0	0	0	1	0	3	3	0	0	5	1	1	6	1	2	49	1	1	3	0	1	0	0	0	0	0	0	0	0	0
1	1	1	5	7	1	4	1	1	0	6	11	0	0	0	0	0	0	0	3	0	7	7	0	0	3	1	1	2	0	2	14	0	1	3	1
3	2	1	4	6	1	4	1	4	0	0	16	0	0	0	0	0	0	0	0	0	0	0	0	0		2			0	3	1		1	3	1
1	2	1	3	6	1	2	2	4	2	4	4	0	0	0	0	0	0	0	1	1	1	1	0	0	3	1	1	2	0	2	2	0	1	3	1
1	1	2	3	2	1	2	2	1	0	50	9	4	0	0	6	3	0	0	4	0	7	6	1	0	4	1	1	3	0	2	9	0	1	3	1
1	2	2	4	7	3	2	2	1	0	12	2	0	0	0	0	8	0	0	1	1	0	0	0	0		2			0	2	16	1	1	2	0	1	0	0	0	0	0	0	0	0	0
1	2	1	2	2	1	4	1	4	0	7	6	0	0	0	0	0	0	0	1	1	0	0	0	0		2			0	2	0		1	3	1
1	2	1	3	7	2	2	2	1	1	4	10	0	3	0	3	8	0	0	0	1	6	6	0	0	5	1	1	2	1	2	4	0	1	3	1
1	2	1	3	7	1	2	2	1	0	0	0	0	0	0	0	0	0	0	1	0	0	0	0	0		2			0	2	16	1	1	3	0	1	1	1	0	1	0	0	0	0	1	2091	17	1	0
1	1	1	3	7	3	1	2	1	0	8	12	0	0	0	0	0	0	0	1	0	0	0	0	0		2			0	2	9	0	1	3	1
1	2	1	4	7	1	2	2	1	0	0	2	0	0	0	0	0	0	0	1	1	2	2	0	0	3	1	1	1	1	2	14	0	1	3	1
1	2	1	2	7	2	2	2	1	0	3	2	0	0	0	0	0	0	0	1	1	0	0	0	0		1	2	2	1	2	14	0	1	3	1
1	2	1	4	7	1	2	2	1	0	0	0	0	0	0	0	0	0	0	2	1	2	2	0	0	3	1	1	3	1	2	6	0	1	3	1
1	2	1	5	7	2	4	1	1	0	8	0	0	0	0	0	0	0	0	0	0	2	2	0	0	5	1	1	2	1	2	2	0	1	3	1
1	2	1	2	2	1	2	2	1	0	0	0	0	0	0	0	0	0	0	0	0	0	0	0	0		2			0	2	28	1	1	2	0	1	0	0	0	0	0	0	0	0	0
1	2	2	4	7	1	2	2	1	0	0	0	0	0	0	0	0	0	0	0	0	0	0	0	0		2			1	2	17	0	1	3	0	0
1	2	2	4	7	1	2	2	1	0	5	9	0	0	0	0	0	0	0	1	1	4	4	0	0		2			1	2	52	1	2	1	0	1	0	1	0	0	0	0	0	0	1	362	56	1	0
1	2	1	6	7	1	1	3	1	0	0	2	0	0	0	0	0	0	0	2	1	0	0	0	0		2			0	2	24	1	1	2	0	1	0	0	0	0	0	0	0	0	0
1	2	1	5	7	1	1	3	1	0	0	7	0	0	0	0	0	0	0	0	0	0	0	0	0		2			1	2	45	1	1	1	0	1	0	0	0	0	0	0	0	0	0
1	2	1	3	7	2	2	2	1	0	5	0	0	0	0	0	0	0	0	0	1	3	2	0	1	4	1	2	6	1	2	11	0	1	3	1
1	1	2	5	7	1	2	2	1	0	6	7	0	0	0	1	0	2	0	2	0	1	1	0	0	3	1	1	2	0	2	64	1	1	2	0	1	0	0	0	0	0	0	0	0	0
1	2	1	4	3	1	2	2	1	0	5	2	0	8	0	0	15	25	0	0	1	4	4	0	0	5	1	1	2	1	2	48	1	1	1	0	1	0	0	0	0	0	0	0	0	0
1	2	1	2	7	1	4	1	1	0	0	0	0	0	0	0	0	0	0	0	0	0	0	0	0		2			1	2	37	1	1	1	0	1	0	0	0	0	0	0	0	0	0
1	2	1	5	4	3	2	2	3	10	9	0	0	1	0	0	6	0	0	1	0	2	1	0	1	5	1	2	2	1	3	16	1	1	3	0	1	0	0	0	0	0	0	0	0	0
1	2	1	2	7	1	2	2	1	0	15	15	0	0	0	0	0	0	0	1	0	0	0	0	0		2			1	2	32	1	1	1	0	1	0	0	0	0	0	0	0	0	0
1	2	1	5	7	1	2	2	1	0	15	4	0	0	0	0	0	0	0	0	0	0	0	0	0		2			1	2	4	0	1	3	1
1	2	2	4	7	2	2	2	1	0	4	5	0	0	0	0	0	0	0	0	1	0	0	0	0		2			1	2	9	0	1	3	1
1	2	1	6	7	3	2	2	1	0	10	0	0	0	0	2	0	0	0	1	1	1	1	0	0	5	1	1	3	1	2	14	0	1	8	1
1	2	1	4	4	3	2	2	1	10	10	4	0	1	0	0	20	4	0	1	1	1	0	0	1	6	1	2	6	0	2	17	0	1	7	0	0
1	2	1	1	7	2	2	2	1	0	1	2	0	0	0	0	0	0	0	14	1	3	0	1	2		2			0	2	41	1	1	2	0	1	0	0	0	0	0	0	0	0	0
1	2	2	4	7	2	2	2	1	3	4	12	1	2	0	0	150	0	0	4	2	10	0	0	10	5	1	1	2	0	2	50	1	2	2	0	1	0	0	0	0	0	0	0	0	0
3	2	1	2	7	1	4	1	4	0	0	0	0	0	0	0	0	0	0	0	0	0	0	0	0		2			1	2	28	1	1	6	0	1	0	0	0	0	0	0	0	0	0
1	2	1	3	4	4	4	1	1	0	25	4	0	0	0	0	4	0	0	1	0	9	0	0	9	5	1	1	2	0	2	6	0	1	3	1
1	2	1	5	4	3	2	2	5	6	15	3	0	0	0	0	25	4	0	2	0	10	0	0	10	5	1	3	2	0	2	52	1	1	2	0	1	0	0	0	0	0	0	0	0	0
1	2	1	4	7	1	1	3	1	0	0	0	0	0	0	0	0	0	0	0	0	0	0	0	0		2			1	2	45	1	1	1	0	1	0	0	0	0	0	0	0	0	0
1	1	1	2	7	2	2	2	1	0	30	0	0	0	0	0	0	0	0	1	0	4	4	0	0	3	1	1	1	1	2	52	1	1	1	0	1	0	0	0	0	0	0	0	0	0
1	2	1	2	5	2	2	2	1	0	1	7	0	1	0	0	0	0	0	0	0	0	0	0	0		2			0	2	4	0	1	3	1
1	2	1	3	7	1	2	2	1	0	5	2	0	0	0	0	0	0	0	2	0	0	0	0	0		2			0	2	16	1	1	3	0	1	0	0	0	0	0	0	0	0	0
1	2	1	3	7	1	4	1	1	0	2	0	3	2	0	0	20	0	0	0	0	2	0	0	0		2			1	2	8	0	1	3	1
1	2	1	3	7	1	2	2	1	0	30	5	0	0	0	0	1	0	0	2	0	3	3	0	0	5	1	2	3	1	2	12	0	1	3	1
1	2	1	4	5	3	2	2	1	0	30	0	0	0	0	0	50	0	0	2	0	8	0	0	8	5	1	2	2	0	2	17	1	1	3	0	1	0	0	0	0	0	0	0	0	0
1	2	1	2	7	1	2	2	1	0	0	0	0	0	0	0	0	0	0	2	0	0	0	0	0		2			0	2	29	1	1	2	0	1	0	0	0	0	0	0	0	0	0
1	1	1	2	7	2	2	2	1	0	30	0	0	0	0	0	0	0	0	1	0	4	4	0	0	3	1	1	1	1	2	29	1	1	3	0	1	0	0	0	0	0	0	0	0	0
3	2	1	6	2	1	2	2	1	0	10	3	0	2	0	3	0	0	0	2	5	7	7	0	0	5	1	1	6	0	2	0		1	8	1
1	2	1	4	7	2	1	2	1	0	10	0	0	0	0	0	0	0	0	1	3	10	5	0	5	5	1	2	2	0	2	61	0	1	2	0	0
1	2	2	4	7	3	2	2	1	30	4	0	0	0	0	0	0	0	0	2	0	0	0	0	0		2			0	2	11	0	1	3	1
1	2	2	4	7	1	2	2	1	0	0	0	0	0	0	0	0	0	0	0	0	3	3	0	0	3	1	2	2	1	2	14	0	1	3	1
1	2	1	5	7	1	2	2	1	0	12	0	0	2	0	0	0	0	0	2	0	0	0	0	0		2			0	2	4	0	1	3	1
1	2	1	2	6	2	4	1	5	0	0	0	0	0	0	0	0	0	0	0	0	1	0	0	1	5	1	2	3	0	2	12	0	1	3	1
1	2	1	6	5	3	2	2	1	0	20	7	0	4	0	1	0	0	0	2	0	1	1	0	0	5	1	2	1	0	2	3	0	1	3	1
1	2	1	4	7	3	2	2	1	10	20	0	0	0	0	0	0	0	0	0	0	2	2	0	0	5	1	1	3	0	2	8	0	1	3	1
1	1	1	3	7	1	1	3	1	0	5	30	0	0	0	0	0	0	0	3	2	9	9	0	0	5	1	1	2	0	2	28	1	1	3	0	1	0	0	0	0	0	0	0	0	0
1	2	1	2	6	2	4	1	1	0	0	0	0	0	0	0	18	0	0	0	0	0	0	0	0		2			1	2	86	1	1	1	0	1	0	0	0	0	0	0	1	0	0
1	2	1	4	7	3	2	2	1	1	2	14	0	0	0	0	6	0	0	1	0	0	0	0	0		2			0	3	11	0	1	8	1
1	2	1	2	7	1	2	2	1	0	0	0	0	0	0	0	0	0	0	2	0	0	0	0	0		2			1	3	6	0	1	3	1
1	2	1	2	7	1	4	1	5	0	10	4	0	0	0	0	0	0	0	1	0	0	0	0	0		2			0	2	21	1	1	2	0	1	0	0	0	0	0	0	0	0	0
1	2	1	2	6	1	2	2	1	0	2	6	0	0	0	0	0	0	0	0	0	0	0	0	0		2			0	2	4	0	1	3	1
1	2	2	3	7	1	2	2	1	0	6	14	0	0	0	0	0	0	0	2	2	9	0	0	9		2			1	2	18	1	1	3	0	1	0	0	0	0	0	0	0	0	0
1	2	1	4	7	2	2	2	1	0	0	0	0	0	0	0	7	0	0	1	1	11	0	0	11	5	1	2	2	1	2	4	0	1	3	1
1	2	1	4	7	1	2	2	1	0	23	0	0	0	0	0	0	0	0	1	0	1	1	0	0	5	1	1	4	1	2	22	1	1	3	0	1	0	0	0	0	0	0	1	0	0
1	2	1	3	7	2	2	2	1	0	0	12	0	0	0	0	0	0	0	0	1	3	3	0	0	3	1	1	1	0	2	63	1	1	2	0	1	0	0	0	0	0	0	0	0	0
1	1	2	4	7	1	2	2	1	0	2	3	0	0	0	0	0	0	0	2	0	2	2	0	0	5	1	2	3	1	2	21	1	1	3	0	1	0	0	0	0	0	0	0	0	0
1	2	2	2	6	1	2	2	1	0	0	3	0	0	0	0	0	0	0	1	0	0	0	0	0		2			1	2	23	1	1	3	0	1	0	0	0	0	0	0	0	0	0
1	1	1	3	7	1	4	2	1	0	0	0	0	0	0	0	0	0	0	0	0	0	0	0	0		2			1	2	17	1	1	3	0	1	0	0	0	0	0	0	0	0	0
1	2	1	1	7	2	2	2	1	0	0	0	0	0	0	0	0	0	0	1	3	0	0	0	0		2			0	2	12	0	1	3	1
1	2	1	3	2	3	2	2	1	0	2	0	0	1	0	4	0	0	0	1	1	2	0	0	2	3	1	1	2	1	3	2	0	1	3	1
1	2	1	1	4	1	4	1	5	0	0	0	0	0	0	0	0	0	0	0	0	0	0	0	0		2			1	2	19	1	1	1	0	1	0	0	0	0	0	0	0	0	0
1	1	1	4	7	2	4	1	1	0	4	10	0	0	0	0	0	0	0	0	0	0	0	0	0		2			1	2	9	0	1	3	1
1	1	1	5	7	2	2	2	1	0	0	3	0	0	0	0	0	0	0	2	0	0	0	0	0		2			0	2	46	1	1	2	0	1	0	0	1	0	0	0	0	0	0
1	2	2	4	2	3	2	2	1	0	5	3	0	0	0	0	20	0	0	5	1	2	0	0	2	5	1	2	2	0	3	0		2	3	1
1	2	1	3	7	2	2	2	1	1	1	0	0	0	0	1	30	0	0	2	1	1	1	0	0	5	1	1	2	1	2	8	0	1	3	1
1	2	1	2	2	1	2	2	1	0	0	1	0	0	0	0	0	0	0	0	0	1	0	1	0		2			0	2	6	0	1	3	1
1	2	1	5	7	1	2	2	1	0	0	5	0	0	0	0	0	0	0	3	0	2	2	0	0	5	1	1	3	0	2	44	1	1	2	0	1	0	0	0	0	0	0	0	0	0
1	2	1	3	7	3	2	2	1	0	4	7	0	0	0	0	0	0	0	2	0	1	1	0	0	3	1	1	2	0	2	22	1	1	2	0	1	0	0	0	0	0	0	0	0	0
1	2	1	4	6	1	4	1	1	0	23	10	0	0	0	0	0	0	0	0	0	7	7	0	0	5	1	1	2	0	2	2	0	1	3	1
1	2	1	3	2	1	4	1	1	0	0	0	0	0	0	0	0	0	0	0	2	0	0	0	0		2			0	3	10	0	1	3	1
2	2	1	2	6	1	4	3	4	0	0	0	0	0	0	0	0	0	0	0	0	0	0	0	0		2			0	2	7	0	1	3	1
1	2	1	3	7	2	2	2	1	0	0	0	0	0	0	0	0	0	0	0	0	0	0	0	0		2			0	2	3	0	1	3	1
1	2	1	3	2	1	4	1	4	0	10	0	0	1	0	0	150	0	0	2	0	7	0	0	7		2			0	2	4	0	1	3	1
1	1	1	3	7	2	2	2	4	0	1	10	0	0	0	0	0	0	0	1	1	1	1	0	0	3	1	1	2	0	2	13	0	1	3	1
1	2	1	3	5	3	4	1	4	0	12	0	1	2	0	0	30	0	0	2	0	3	0	1	2		2			0	2	3	0	1	3	1
1	2	2	4	4	3	4	1	4	2	12	20	6	2	0	0	30	0	0	4	6	14	0	0	14	5	1	2	2	0	2	1	0	2	3	1
1	2	2	5	7	1	1	3	1	0	6	0	0	1	0	0	15	0	0	1	1	0	0	0	0		2			1	2	5	0	2	3	1
1	1	1	2	6	1	1	1	1	0	8	0	0	0	0	0	0	0	0	0	1	1	1	0	0	3	1	2	2	1	2	21	1	1	1	0	1	0	0	0	0	0	0	0	0	0
1	2	1	2	7	1	4	1	1	0	15	0	0	0	0	0	0	0	0	1	0	8	3	0	5	5	1	1	3	1	2	29	1	1	1	0	1	0	0	0	0	0	0	1	0	0
1	2	1	4	6	1	2	2	4	3	30	14	0	0	0	0	0	0	0	1	1	2	0	2	0		2			1	2	17	1	1	3	0	1	0	0	0	0	0	0	0	0	0
1	2	1	3	7	1	1	3	1	0	4	0	0	0	0	0	0	0	0	0	4	0	0	0	0		2			0	2	31	1	1	2	0	1	0	0	0	0	0	0	0	0	0
1	2	1	5	7	1	2	2	1	0	0	0	0	0	0	0	0	0	0	0	0	0	0	0	0		2			1	2	48	1	1	1	0	1	0	0	0	0	0	0	0	0	0
1	1	1	5	7	1	1	3	1	0	3	0	0	0	0	0	0	0	0	0	0	0	0	0	0		2			0	2	5	0	1	3	1
1	2	2	4	7	2	2	2	1	0	10	0	0	0	3	10	20	0	0	3	1	8	2	0	6	5	1	1	2	0	2	87	1	1	4	0	1	0	0	0	0	1	0	0	0	0
1	2	1	4	6	1	2	2	1	0	10	0	0	0	0	0	0	0	0	0	0	0	0	0	0		2			1	2	13	0	1	3	1
1	2	1	4	4	3	2	2	5	0	6	0	1	4	0	2	60	0	0	5	2	15	0	0	15	5	1	1	2	0	2	52	1	1	3	0	1	0	0	0	0	0	0	0	0	0
1	2	2	4	7	1	2	2	4	0	4	0	0	1	0	1	0	3	0	2	0	1	1	0	0	3	1	1	2	0	2	59	1	1	2	0	1	0	0	0	0	0	0	0	1	0
1	2	1	5	7	1	2	1	1	3	2	4	0	0	0	0	0	0	0	1	0	0	0	0	0		2			1	2	12	0	1	3	1
1	1	2	4	7	1	2	2	1	0	0	0	0	0	0	0	0	0	0	0	0	0	0	0	0		2			1	2	4	0	2	3	1
1	2	1	4	5	3	2	2	1	4	15	0	1	1	0	3	1	0	0	4	0	2	2	0	0	5	1	1	2	0	2	37	1	1	2	0	1	0	0	1	1	1	1	0	1	1	1122	37	1	0
1	2	1	3	7	2	2	2	1	0	2	2	0	1	0	0	1	0	0	0	1	4	0	0	4	5	1	2	2	0	2	9	0	1	3	1
1	2	1	3	6	1	4	1	5	0	0	3	0	0	0	0	0	0	0	0	0	3	3	0	0	5	1	1	2	0	2	27	1	1	2	0	1	0	0	0	0	0	0	0	0	0
1	2	1	5	7	1	2	2	1	7	0	26	0	3	0	3	0	0	0	0	0	7	7	0	0	6	1	1	2	1	2	59	1	1	1	0	1	0	0	0	0	0	0	0	0	0
1	1	1	5	5	3	1	3	1	0	0	0	1	1	0	0	0	0	0	1	0	1	1	0	0	5	1	1	2	1	2	23	1	1	3	0	1	0	0	0	0	0	0	0	0	0
1	1	1	5	7	1	2	2	1	0	6	0	0	0	0	0	0	0	0	5	0	0	0	0	0		2			0	2	14	0	1	3	1
3	1	1	4	7	1	1	3	1	0	3	0	0	0	0	0	0	0	0	3	0	0	0	0	0		2			1	2	2	0	1	3	1
1	2	1	2	7	3	4	1	1	10	2	6	0	0	0	0	0	0	0	0	0	0	0	0	0		2			1	2	0		1	3	1
1	2	1	4	7	2	4	1	1	0	3	0	0	1	0	3	30	0	0	1	0	2	0	0	2	5	1	1	2	1	2	10	0	1	3	1
1	1	1	5	7	2	2	1	1	0	0	0	0	0	0	0	0	0	0	1	1	7	1	0	6	5	1	1	3	0	2	36	1	1	2	0	1	0	0	1	1	0	0	0	0	1	2801	36	1	0
1	1	1	3	7	1	1	3	1	0	0	0	0	0	0	0	0	0	0	0	0	0	0	0	0		1	1	1	0	2	67	1	1	2	0	1	0	0	0	0	0	0	0	0	0
1	1	1	5	6	1	2	2	1	0	0	8	0	0	0	0	0	0	0	1	0	1	1	0	0	3	1	2	2	0	2	43	1	3	2	0	1	0	0	0	0	0	0	0	0	0
1	2	2	2	7	2	2	2	1	1	3	0	0	0	0	0	0	0	0	0	0	0	0	0	0		2			1	2	32	1	1	3	0	1	0	0	1	0	0	0	0	0	0
1	2	2	3	4	3	2	2	1	3	5	2	0	1	0	1	20	0	0	2	1	7	0	0	7		2			1	2	20	1	2	1	0	1	0	0	0	0	0	0	0	0	0
1	1	1	6	7	1	1	3	1	0	0	7	0	0	0	0	0	0	0	1	0	0	0	0	0		2			0	2	11	0	1	3	1
1	1	1	3	5	2	2	2	5	0	0	0	0	0	0	0	0	0	0	2	2	0	0	0	0		2			0	2	22	1	1	3	0	1	0	0	1	0	0	0	0	0	0
1	1	1	4	7	1	2	2	1	5	6	3	0	3	0	0	0	0	0	2	1	11	11	0	0	3	1	1	3	1	2	20	1	1	1	0	1	0	0	0	0	0	0	0	0	0
1	2	1	2	4	3	4	1	5	8	20	0	1	1	1	20	80	0	0	2	1	0	0	0	0		1	2	2	0	2	50	1	1	2	0	1	0	0	0	0	0	0	0	0	0
1	2	1	3	7	2	4	1	1	0	2	7	0	0	0	0	0	0	0	1	0	4	0	4	0		2			1	2	7	0	1	3	1
1	2	1	4	7	2	2	2	1	0	20	0	0	0	0	0	1	0	0	1	0	0	0	0	0		2			1	2	38	1	1	1	0	1	0	0	0	0	0	0	0	0	0
1	2	1	2	7	1	2	2	1	0	0	0	0	0	0	0	0	0	0	2	0	0	0	0	0		2			1	3	7	0	1	3	1
1	2	1	5	7	1	2	1	4	0	0	0	0	0	0	0	0	0	0	0	0	0	0	0	0		2			0	2	12	0	1	3	1
1	2	1	3	7	1	1	3	1	0	0	0	0	0	0	0	0	0	0	0	1	2	2	0	0	5	1	1	1	1	2	15	1	1	3	0	1	0	0	0	0	0	0	0	0	0
1	1	1	5	7	1	1	3	1	0	10	5	0	0	0	0	0	0	0	0	0	0	0	0	0		2			1	2	14	0	1	3	1
1	2	1	3	2	1	2	2	1	0	0	0	0	0	0	0	0	0	0	0	0	0	0	0	0		2			1	2	30	0	1	1	0	0
1	2	1	4	7	1	2	2	1	0	0	0	0	0	0	0	0	0	0	1	0	0	0	0	0		2			0	2	55	1	1	2	0	1	0	0	0	0	0	0	0	0	0
3	2	1	10	5	3	2	2	5	0	10	0	0	2	0	0	0	0	0	1	0	3	1	0	2	5	1	1	2	0	2	6	0	1	3	1
1	2	1	5	7	3	2	1	1	0	20	0	0	0	0	0	0	0	0	0	0	1	1	0	0	3	1	1	1	1	2	35	1	1	1	0	1	0	0	0	0	0	0	0	0	0
1	1	1	4	7	1	2	2	1	2	10	3	0	0	0	2	0	0	0	3	0	3	3	0	0	5	1	1	2	1	2	26	1	1	9	0	1	0	0	0	0	0	0	0	0	0
1	1	1	4	7	2	2	2	1	0	0	0	0	0	0	0	0	0	0	0	1	1	1	0	0	5	1	1	2	1	2	1	0	1	8	1
1	2	1	5	7	2	2	2	1	0	5	0	0	0	0	0	0	0	0	2	0	2	0	0	0		2			0	2	13	0	1	3	1
1	2	1	4	7	1	1	3	1	0	0	0	0	0	0	0	0	0	0	0	0	0	0	0	0		2			1	2	10	0	1	3	1
1	1	2	6	7	1	2	2	1	0	0	0	0	0	0	20	150	0	0	3	0	6	6	0	0	5	1	1	2	0	2	41	1	1	2	0	1	0	0	0	0	0	0	0	0	0
1	2	1	4	7	2	2	2	1	0	0	1	0	0	0	4	0	0	0	3	4	1	1	0	0	5	1	1	3	0	2	70	1	1	2	0	1	0	0	0	0	0	0	0	0	0
1	2	1	3	7	1	2	2	1	0	0	0	0	0	0	0	0	0	0	0	0	0	0	0	0		2			0	2	39	1	1	2	0	1	0	0	0	0	0	0	0	0	0
3	2	1	2	6	2	2	2	4	0	0	0	0	0	0	0	0	0	0	0	0	0	0	0	0		2			1	2	22	1	1	1	0	1	0	0	0	0	0	0	0	0	0
1	2	2	4	6	1	2	1	1	6	5	6	0	0	0	0	0	0	0	3	1	0	0	0	0		2			0	2	62	1	1	2	0	1	0	1	0	0	0	0	0	1	1	2	63	1	0
1	2	1	4	5	3	2	2	1	3	6	6	0	3	0	2	3	1	0	2	0	5	5	0	0	5	1	1	2	0	2	69	1	1	2	0	1	0	0	0	0	0	0	1	0	0
1	2	1	4	7	1	2	2	1	0	8	2	0	0	0	1	0	0	0	1	1	1	1	0	0	3	1	1	2	0	2	70	1	1	2	0	1	0	0	0	0	0	0	0	0	0
1	2	2	4	7	1	2	2	4	0	15	0	0	0	0	0	0	0	0	1	1	4	4	0	0	5	1	1	3	1	2	2	0	2	3	1
1	2	1	2	7	2	2	2	4	0	0	0	0	0	0	0	0	0	0	1	0	1	0	0	0		2			1	2	13	0	1	3	1
1	2	1	3	7	2	4	1	1	0	15	2	0	3	0	0	4	0	0	2	1	4	1	0	3	5	1	1	2	1	2	41	0	1	1	0	0
1	2	1	3	6	1	2	2	1	0	0	0	0	0	0	0	0	0	0	0	1	0	0	0	0		2			1	2	30	1	1	1	0	1	0	0	0	0	0	0	0	0	0
1	1	1	3	7	1	2	2	1	0	0	0	0	0	0	0	0	0	0	0	0	0	0	0	0		2			0	2	46	1	1	2	0	1	0	0	0	0	0	0	0	0	0
1	2	1	1	7	3	2	2	1	0	0	0	0	0	0	0	0	0	0	0	0	1	1	0	0	6	1	1	2	1	2	5	0	1	3	1
1	2	1	5	5	2	2	2	1	0	2	3	0	0	0	0	1	0	0	1	0	7	6	0	1	3	1	2	3	0	2	3	0	1	3	1
1	2	1	4	5	2	2	2	1	0	3	0	0	0	0	0	0	0	0	1	0	0	0	0	0		2			0	2	76	1	1	2	0	1	0	0	0	0	1	0	1	0	1	678	77	1	0
1	1	1	5	7	1	1	3	1	0	20	50	0	0	0	0	0	0	0	1	4	0	0	0	0		2			0	2	14	0	1	3	1
1	2	1	3	7	1	2	2	1	0	0	0	0	0	0	0	0	0	0	1	0	1	1	0	0	5	1	2	2	0	2	28	1	1	2	0	1	0	0	0	0	0	0	0	0	0
1	2	1	3	7	1	1	3	1	0	0	0	0	0	0	0	0	0	0	1	0	15	15	0	0	5	1	1	2	1	2	28	1	1	1	0	1	0	0	0	0	0	0	0	0	0
1	2	1	3	7	2	1	2	1	3	0	3	0	0	0	1	7	0	0	0	0	12	12	0	0	5	1	2	5	0	2	56	1	1	2	0	1	0	0	0	0	0	0	0	0	0
1	2	1	6	7	1	1	3	1	0	0	0	0	0	0	0	0	0	0	1	0	0	0	0	0		2			0	2	62	1	1	2	0	1	0	0	1	0	0	0	0	0	0
1	1	1	3	7	1	4	2	4	0	0	0	0	0	0	0	0	0	0	0	1	0	0	0	0		2			1	2	24	1	1	1	0	1	0	0	0	0	0	0	0	0	0
1	2	1	3	7	1	1	3	1	0	0	20	0	0	0	0	0	0	0	0	0	4	0	4	0		2			1	2	6	0	1	8	1
1	2	2	3	7	1	2	2	1	2	6	4	0	1	0	5	7	0	0	2	4	0	0	0	0		2			1	2	30	1	1	3	0	1	0	0	0	0	0	0	0	0	0
1	1	1	4	6	1	1	3	1	2	9	0	0	0	0	0	0	0	0	3	0	11	8	2	1	5	1	2	5	1	2	12	0	1	3	1
1	2	1	5	7	1	2	2	1	0	0	9	0	0	0	0	0	0	0	2	0	2	2	0	0	3	1	1	3	0	2	5	0	1	3	1
1	2	1	3	5	3	2	2	1	0	0	0	0	0	0	0	0	0	0	1	0	0	0	0	0		2			1	2	33	1	1	1	0	1	0	0	0	0	0	0	0	0	0
1	2	1	4	5	3	2	2	1	0	7	7	0	2	0	0	60	0	0	2	1	1	0	0	1		2			0	2	9	0	1	3	1
1	2	1	3	7	2	1	3	1	0	4	15	0	0	0	0	0	0	0	0	0	0	0	0	0		2			1	2	0		1	3	1
1	2	1	4	7	1	2	2	1	0	0	0	0	0	0	0	0	0	0	0	0	0	0	0	0		2			0	2	28	1	1	2	0	1	0	0	0	0	0	0	0	0	0
1	2	1	3	2	1	2	2	4	0	4	0	0	0	0	0	0	0	0	0	2	0	0	0	0		2			0	3	16	1	1	5	0	1	0	0	0	0	0	0	0	0	0
1	2	1	3	7	1	2	2	1	0	0	0	0	0	0	0	0	0	0	0	0	0	0	0	0		2			1	2	15	1	1	3	0	1	0	0	0	0	0	0	0	0	0
1	2	1	2	3	1	4	1	1	0	0	2	0	0	0	0	0	0	0	3	2	0	0	0	0		2			1	2	41	1	1	1	0	1	0	0	0	0	1	0	0	0	0
1	1	1	5	7	1	1	3	1	0	20	22	0	0	0	0	0	0	0	1	0	1	1	0	0	5	1	1	6	0	2	5	0	1	8	1
1	2	1	3	7	2	1	2	1	1	1	15	0	0	0	2	20	0	0	0	0	10	0	0	10	5	1	2	2	1	2	13	0	1	3	1
1	2	2	3	7	1	2	2	1	0	2	0	0	0	0	0	0	0	0	0	0	0	0	0	0		2			0	2	0		2	3	1
2	2	1	3	7	1	1	3	1	0	0	0	0	0	0	0	0	0	0	0	0	0	0	0	0		2			0	3	3	0	1	3	1
1	2	1	4	2	1	4	1	1	0	0	10	0	0	0	0	0	0	0	0	0	3	3	0	0	6	1	1	2	1	2	17	1	1	3	0	1	0	0	0	0	0	0	0	0	0
1	2	1	4	6	1	4	1	1	0	0	0	0	0	0	0	0	0	0	0	0	0	0	0	0		2			0	2	10	0	1	3	1
1	2	2	4	7	1	1	3	1	1	5	5	0	1	0	0	0	0	0	1	0	8	8	0	0	5	1	2	2	0	3	20	0	1	3	0	0
1	2	2	4	7	1	4	2	1	0	0	0	0	0	0	0	0	0	0	0	0	0	0	0	0		2			1	2	10	0	1	3	1
2	2	1	4	6	2	4	1	1	0	0	0	0	0	0	0	0	0	0	0	0	1	0	0	0		2			1	2	29	0	1	1	0	0
1	2	1	2	6	3	4	1	5	0	0	0	0	0	0	0	0	0	0	0	0	1	1	0	0	4	1	2	2	0	2	4	0	1	3	1
1	2	2	1	7	1	2	2	1	0	0	2	0	0	0	0	0	0	0	1	6	14	0	0	14		2			1	2	4	0	2	3	1
1	2	1	4	7	1	2	2	1	0	0	0	0	0	0	0	0	0	0	0	0	0	0	0	0		2			1	2	14	0	1	3	1
2	2	1	2	7	1	4	1	1	0	20	0	0	0	0	0	0	0	0	2	0	0	0	0	0		2			0	2	1		1	3	1
1	2	1	4	5	2	2	2	4	0	40	2	0	1	0	0	1	0	0	0	0	27	27	0	0	6	1	2	6	0	2	24	1	1	2	0	1	0	0	0	0	0	0	0	0	0
2	2	1	3	6	1	4	1	1	0	0	0	0	0	0	0	0	0	0	0	0	0	0	0	0		2			1	2	5	0	1	3	1
1	2	1	1	7	1	4	1	1	0	3	0	0	0	0	0	0	0	0	2	0	0	0	0	0		2			0	2	0		1	3	1
1	2	1	4	7	1	1	3	1	0	12	0	0	0	0	0	0	0	0	2	0	1	0	0	1	3	1	2	3	0	2	15	1	1	3	0	1	0	0	0	0	0	0	0	0	0
1	2	1	4	7	3	2	2	4	0	10	2	0	0	0	0	0	0	0	1	0	2	0	0	0		2			1	2	0		1	3	1
1	1	1	4	6	1	4	1	1	0	0	0	0	0	0	0	0	0	0	0	0	0	0	0	0		2			0	2	36	1	1	2	0	1	0	0	0	0	0	0	0	0	0
1	2	1	4	6	1	2	2	4	0	0	0	0	0	0	0	0	0	0	1	0	0	0	0	0		2			0	2	10	0	1	3	1
1	2	1	3	7	1	1	3	1	0	3	0	0	0	0	0	0	0	0	0	1	0	0	0	0		2			0	2	20	1	1	3	0	1	0	0	0	0	0	0	0	0	0
1	2	1	3	6	1	4	1	1	0	0	10	0	0	0	0	0	0	0	1	0	1	1	0	0	5	1	1	2	0	2	38	1	1	2	0	1	0	0	0	0	0	0	0	0	0
1	2	1	3	7	1	1	3	1	0	0	19	0	0	0	0	0	0	0	0	0	0	0	0	0		2			0	2	13	0	1	3	1
1	2	1	3	7	3	2	2	1	0	4	7	0	0	0	0	0	0	0	2	0	1	1	0	0	3	1	1	2	0	2	3	0	1	3	1
1	2	1	4	7	1	1	3	1	0	3	4	0	0	0	0	0	0	0	0	0	0	0	0	0		2			1	2	10	0	1	3	1
1	2	1	3	6	1	2	2	4	0	3	2	0	0	0	0	0	0	0	0	0	2	0	1	1	5	1	2	6	1	2	8	0	1	3	1
1	2	2	3	7	1	1	3	1	0	0	0	0	0	0	0	0	0	0	0	0	0	0	0	0		2			1	2	3	0	1	8	1
1	2	1	4	7	1	2	2	1	0	0	0	0	0	0	0	0	0	0	1	0	1	1	0	0	3	1	1	3	0	2	4	0	1	3	1
1	1	1	5	7	2	2	2	1	0	0	0	0	0	0	0	0	0	0	0	0	0	0	0	0		2			0	2	18	1	1	2	0	1	0	0	0	0	0	0	0	0	0
1	2	1	4	7	1	4	2	1	3	5	0	0	0	0	0	0	0	0	0	1	0	0	0	0		2			1	2	3	0	1	3	1
1	2	2	4	7	1	2	2	1	0	0	0	0	0	0	0	0	0	0	0	0	0	0	0	0		2			0	2	1	0	2	3	1
1	2	1	3	7	2	4	1	5	0	10	0	0	0	0	0	8	0	0	2	0	6	0	0	6	6	1	1	2	1	3	3	0	1	3	1
1	2	1	3	7	2	2	2	4	0	4	2	1	1	0	1	1	0	0	1	0	3	0	0	0		2			1	2	13	0	1	3	1
1	1	1	3	6	1	4	1	5	0	0	0	0	0	0	0	0	0	0	0	0	0	0	0	0		2			0	2	22	1	1	3	0	1	0	0	0	0	0	0	0	0	0
1	2	1	2	7	1	2	2	4	0	3	2	0	0	0	0	0	0	0	0	0	0	0	0	0		2			1	2	5	0	1	3	1
1	2	1	3	2	1	4	1	4	0	1	2	0	0	0	0	0	0	0	2	0	1	1	0	0	5	1	1	2	1	2	14	0	1	3	1
1	2	1	2	6	1	2	2	1	0	0	0	0	0	0	0	0	0	0	0	0	1	1	0	0	5	1	1	2	1	2	3	0	1	3	1
2	1	2	2	2	1	4	1	1	0	9	6	0	0	0	0	0	0	0	0	0	0	0	0	0		2			1	2	14	0	1	3	1
1	2	1	3	5	3	2	2	1	0	0	0	0	0	0	0	0	0	0	3	0	0	0	0	0		2			0	2	15	0	1	3	0	0
1	2	1	3	7	2	2	2	1	0	4	15	0	0	0	0	11	0	0	2	3	10	0	0	10	5	1	2	2	0	2	14	0	1	3	1
3	2	1	3	7	1	4	1	1	0	0	0	0	0	0	0	0	0	0	0	0	0	0	0	0		2			1	2	2	0	1	3	1
1	2	1	3	6	1	2	2	1	0	0	0	0	0	0	0	0	0	0	3	0	0	0	0	0		2			1	2	12	0	1	3	1
1	2	1	4	3	1	2	2	1	0	0	0	0	0	0	0	0	0	0	0	1	2	2	0	0	5	1	1	2	0	3	10	0	1	3	1
1	2	1	3	7	1	1	3	1	0	4	0	0	0	0	0	0	0	0	0	0	0	0	0	0		2			0	2	78	1	1	2	0	1	0	0	0	0	0	0	0	0	0
1	1	2	3	7	1	1	3	1	0	0	0	0	0	0	0	0	0	0	2	0	0	0	0	0		2			0	2	2	0	2	8	1
1	2	1	1	5	3	4	1	1	0	0	0	0	0	0	0	0	0	0	0	1	0	0	0	0		2			0	2	6	0	1	3	1
1	2	1	4	7	3	2	2	1	0	5	10	0	2	0	4	20	0	0	0	0	3	0	0	0		2			1	2	0		1	3	1
1	2	1	3	6	1	4	1	1	0	0	10	0	0	0	0	0	0	0	1	0	1	1	0	0	5	1	1	2	1	2	11	0	1	3	1
1	2	1	3	7	2	2	2	1	5	7	3	0	0	0	0	9	0	0	1	1	0	0	0	0		2			1	2	40	1	1	1	0	1	0	0	0	0	0	0	0	0	0
1	1	1	3	7	1	1	3	1	0	4	0	0	0	0	0	0	0	0	1	0	0	0	0	0		2			1	2	2	0	1	3	1
1	1	1	6	7	1	1	3	1	0	1	4	0	0	0	0	0	0	0	1	1	7	7	0	0	5	1	1	2	0	2	21	1	1	2	0	1	0	0	0	0	0	0	0	0	0
1	1	1	3	7	1	1	1	1	0	0	0	0	0	0	0	0	0	0	0	0	0	0	0	0		2			0	2	11	0	1	3	1
1	1	1	3	7	1	1	1	1	0	0	0	0	0	0	0	0	0	0	0	0	0	0	0	0		2			1	2	9	0	1	3	1
1	2	1	3	7	1	1	3	1	0	5	6	0	0	0	0	0	0	0	2	1	5	5	0	0	3	1	1	1	1	2	62	1	1	1	0	1	0	0	0	0	0	0	0	0	0
1	1	1	5	7	1	1	3	1	0	8	4	0	0	0	0	0	0	0	1	1	0	0	0	0		2			1	2	46	1	1	1	0	1	0	0	0	0	0	0	0	0	0
1	2	1	2	5	3	4	1	4	0	5	20	0	0	0	0	0	0	0	1	2	0	0	0	0		2			1	2	5	0	1	3	1
1	2	1	1	7	2	4	2	1	0	2	20	0	0	0	0	0	0	0	2	2	0	0	0	0		1	3	2	1	2	14	0	1	3	1
1	2	1	4	6	1	2	2	1	0	1	5	0	0	0	0	0	0	0	1	0	0	0	0	0		2			0	2	55	1	1	2	0	1	0	0	0	0	0	0	0	0	0
1	2	1	4	7	1	2	2	1	0	4	28	0	0	0	0	0	0	0	1	1	1	1	0	0	5	1	1	2	1	2	6	0	1	3	1
1	2	1	5	6	1	2	2	4	0	0	5	0	0	0	0	0	0	0	0	0	0	0	0	0		1	1	2	1	2	39	1	1	3	0	1	0	0	0	0	0	0	0	0	0
1	2	1	4	6	1	4	1	1	0	0	0	0	0	0	0	0	0	0	2	1	0	0	0	0		1	3	2	0	2	18	1	1	3	0	1	0	0	0	0	0	0	0	0	0
1	2	1	4	6	1	2	2	4	0	0	0	0	0	0	0	0	0	0	0	0	0	0	0	0		2			1	2	10	0	1	3	1
1	2	1	3	7	1	4	1	4	0	9	0	0	0	0	0	0	0	0	0	1	3	3	0	0	3	1	1	2	1	2	9	0	1	3	1
1	2	1	5	7	3	2	2	5	3	3	20	0	1	0	1	0	0	0	1	1	2	2	0	0	6	1	1	2	1	2	5	0	1	3	1
1	2	2	4	5	3	2	1	1	0	15	11	0	0	0	0	0	0	0	0	1	2	2	0	0	5	1	1	6	0	2	24	0	2	2	0	0
1	2	2	4	7	1	1	3	1	0	8	7	0	0	0	0	0	0	0	1	1	0	0	0	0		1	2	2	1	2	1	0	2	3	1
1	2	1	4	6	1	4	1	4	1	0	8	0	0	0	0	0	0	0	0	0	1	1	0	0	5	1	2	3	1	2	39	0	1	1	0	0
3	2	1	4	5	2	2	2	1	0	10	0	0	0	0	0	0	0	0	2	0	5	0	0	0		2			1	2	7	0	1	3	1
1	2	1	2	6	3	4	1	4	0	0	0	0	0	0	0	0	0	0	0	0	0	0	0	0		2			0	2	0		1	3	1
1	2	2	4	6	1	2	1	1	6	5	6	0	0	0	0	0	0	0	3	1	0	0	0	0		2			1	2	1	0	2	3	1
1	1	1	4	7	2	2	2	4	0	15	3	0	0	0	0	0	0	0	0	0	0	0	0	0		2			0	2	5	0	1	3	1
1	1	1	6	7	1	4	1	1	0	0	5	0	0	0	0	0	0	0	0	1	7	2	0	5	5	1	2	2	0	2	18	1	1	3	0	1	0	0	0	0	0	0	0	0	0
1	1	1	4	7	1	1	3	1	0	0	2	0	0	0	0	0	0	0	2	0	3	3	0	0	3	1	2	2	0	2	8	0	1	3	1
1	2	1	3	7	1	1	3	1	0	0	15	0	0	0	0	0	0	0	1	1	2	2	0	0	5	1	1	2	0	2	4	0	1	3	1
1	2	1	4	6	1	4	1	1	0	23	10	0	0	0	0	0	0	0	0	0	7	7	0	0	5	1	1	2	0	2	5	0	1	3	1
1	2	1	3	7	3	4	1	1	0	0	0	0	0	0	0	0	0	0	0	1	0	0	0	0		1	1	2	0	2	7	0	1	3	1
1	3	1	2	6	1	4	1	4	0	0	0	0	0	0	0	0	0	0	0	2	0	0	0	0		2			1	2	2	0	1	3	1
1	2	1	2	7	1	4	2	1	0	2	0	0	0	0	0	0	0	0	0	0	1	1	0	0	3	1	2	2	1	2	14	0	1	3	1
1	2	1	5	5	3	2	2	1	1	12	5	0	0	0	0	0	10	0	0	2	1	1	0	0	5	1	1	2	0	2	74	1	1	2	0	1	0	0	0	0	0	0	0	0	0
1	1	1	3	6	1	4	1	1	0	0	0	0	0	0	0	0	0	0	0	0	0	0	0	0		2			0	2	9	0	1	3	1
1	2	1	3	7	1	1	3	1	0	10	0	0	0	0	0	0	0	0	0	0	15	11	4	0	5	1	2	5	1	2	76	1	1	1	0	1	0	0	0	0	0	0	0	0	0
1	1	1	5	5	3	2	2	1	0	8	2	0	0	0	0	0	0	0	1	0	4	3	0	1	3	1	2	3	1	2	5	0	1	3	1
1	1	1	5	7	1	2	2	1	0	0	0	0	0	0	0	0	0	0	0	0	0	0	0	0		2			0	2	9	0	1	3	1
1	2	1	3	7	3	2	2	1	0	16	0	0	0	0	0	0	0	0	2	0	0	0	0	0		2			0	2	5	0	1	3	1
1	2	2	5	7	1	2	2	1	0	20	15	0	1	1	30	0	0	0	1	1	15	2	0	13	3	1	2	2	1	2	8	0	2	3	1
1	2	1	2	7	1	4	1	4	0	0	0	0	0	0	0	0	0	0	0	0	0	0	0	0		2			1	2	6	0	1	3	1
1	2	1	1	6	1	4	1	1	0	0	2	0	0	0	0	0	0	0	0	0	0	0	0	0		2			1	2	13	0	1	3	1
1	2	1	3	7	1	2	2	1	0	0	1	0	0	0	0	0	0	0	0	0	0	0	0	0		2			0	2	7	0	1	3	1
1	1	1	3	7	1	1	3	1	0	12	5	0	0	0	0	0	0	0	2	2	0	0	0	0		1	2	2	0	2	14	0	1	3	1
1	1	1	4	7	1	4	1	1	0	0	0	0	0	0	0	0	0	0	0	0	0	0	0	0		2			0	2	7	0	1	3	1
1	1	1	5	7	2	2	2	1	0	0	0	0	0	0	0	0	0	0	1	0	0	0	0	0		2			1	2	60	1	1	1	0	1	0	0	0	0	0	0	0	0	0
1	2	1	3	7	1	2	2	1	0	0	0	0	0	0	0	0	0	0	1	0	0	0	0	0		2			0	3	3	0	1	3	1
1	2	1	2	7	2	2	2	5	0	5	0	0	0	0	0	0	0	0	1	0	2	2	0	0	5	1	2	3	0	2	4	0	1	3	1
1	2	1	4	7	2	2	2	1	0	10	6	0	4	0	0	30	0	0	3	2	12	11	1	0	5	1	1	3	0	2	4	0	2	3	1
1	1	1	5	7	1	2	2	1	0	8	1	0	0	0	0	0	0	0	1	0	1	1	0	0	3	1	3	2	0	2	50	1	1	2	0	1	0	0	1	0	0	0	0	0	0
1	2	1	2	3	1	4	1	4	0	0	0	0	0	0	0	0	0	0	0	0	0	0	0	0		2			0	2	3	0	1	3	1
1	2	1	5	7	1	2	2	1	0	8	10	0	0	0	0	0	0	0	1	2	2	0	2	0		2			0	2	17	0	1	3	0	0
2	1	1	2	7	1	1	3	1	0	0	0	0	0	0	0	0	0	0	0	0	0	0	0	0		2			0	2	1	0	1	3	1
1	1	1	3	6	1	4	1	1	0	0	0	0	0	0	0	0	0	0	0	0	0	0	0	0		2			0	2	13	0	1	3	1
1	2	1	3	5	3	2	2	1	0	1	15	0	1	0	2	0	0	0	0	0	6	6	0	0	5	1	2	2	0	2	2	0	1	3	1
1	1	1	3	7	1	1	3	1	0	3	2	0	0	0	0	0	0	0	1	1	8	8	0	0	3	1	2	3	1	2	14	0	1	3	1
1	2	2	4	7	1	2	2	1	0	0	0	0	0	0	0	0	0	0	0	0	0	0	0	0		2			0	2	18	1	2	3	0	1	0	0	0	0	0	0	0	0	0
1	2	1	3	6	1	4	1	1	0	0	16	5	1	1	2	0	0	0	1	1	0	0	0	0		1	3	2	1	2	45	0	1	1	0	0
1	2	1	3	7	1	2	2	1	0	0	0	0	0	0	0	0	0	0	1	0	0	0	0	0		2			1	2	38	0	1	1	0	0
1	2	1	3	7	1	2	2	1	0	0	0	0	0	0	0	0	0	0	1	0	0	0	0	0		2			1	2	10	0	1	3	1
1	2	1	4	7	1	2	2	1	0	0	0	0	0	0	0	0	0	0	2	0	0	0	0	0		2			0	2	42	1	1	2	0	1	0	0	0	0	0	0	0	0	0
1	2	1	3	7	2	4	1	4	5	0	0	0	1	0	0	2	0	0	2	0	1	0	0	0		2			1	2	6	0	1	3	1
1	2	2	2	7	2	4	1	5	0	20	0	0	0	0	0	0	0	0	1	1	9	0	2	7		2			0	2	6	0	1	3	1
1	2	1	2	7	2	4	1	1	0	0	0	0	0	0	0	0	0	0	1	0	0	0	0	0		2			0	2	6	0	1	3	1
1	2	1	2	7	1	4	1	1	0	0	0	0	0	0	0	0	0	0	0	0	0	0	0	0		2			0	2	2	0	1	3	1
1	1	1	5	7	1	2	2	1	0	0	0	0	0	0	0	0	0	0	0	0	0	0	0	0		2			0	2	31	1	1	2	0	1	0	0	0	0	0	0	0	0	0
1	2	1	3	5	3	4	2	1	0	2	0	0	0	0	0	0	0	0	1	1	7	7	0	0	5	1	2	2	0	3	1	0	1	3	1
1	2	1	3	7	2	2	2	1	0	15	10	0	0	0	0	0	0	0	1	2	14	4	0	10	3	1	2	2	1	2	18	0	1	3	0	0
1	2	2	3	5	3	4	1	1	0	4	3	0	0	0	0	0	0	0	0	0	0	0	0	0		1	2	2	0	2	9	0	1	3	1
1	1	1	3	5	2	2	2	1	0	0	15	0	0	0	0	0	0	0	0	0	0	0	0	0		1	2	2	1	2	12	0	1	3	1
1	2	2	4	7	1	4	1	1	0	0	4	0	0	0	0	0	0	0	0	0	4	2	0	2	3	1	2	3	0	2	0		1	3	1
1	1	1	5	7	1	1	3	1	0	0	10	0	0	0	0	0	0	0	0	0	4	4	0	0	5	1	2	2	0	2	42	1	1	2	0	1	0	0	0	0	0	0	0	0	0
3	2	1	2	2	1	4	2	4	0	0	0	0	0	0	0	0	0	0	0	1	0	0	0	0		2			0	2	31	1	1	2	0	1	0	0	0	0	0	0	0	0	0
1	2	1	3	7	3	2	2	1	0	0	3	0	0	0	1	0	0	0	2	0	0	0	0	0		2			0	2	46	1	1	2	0	1	0	0	0	0	0	0	0	0	0
1	2	2	4	7	1	2	2	1	0	15	2	0	0	0	0	0	0	0	1	0	0	0	0	0		2			0	2	25	1	2	2	0	1	0	0	0	0	0	0	0	0	0
1	2	1	2	7	1	1	3	1	0	2	0	0	0	0	0	0	0	0	1	0	0	0	0	0		2			1	2	32	1	1	1	0	1	0	0	0	0	0	0	0	0	0
1	2	1	4	2	1	2	2	1	0	15	0	0	0	0	0	0	0	0	0	0	0	0	0	0		2			0	2	2	0	1	3	1
1	2	1	3	5	3	4	1	4	0	0	0	0	0	0	0	0	0	0	0	0	0	0	0	0		1	1	2	0	2	12	0	1	3	1
1	2	1	3	7	1	1	3	1	0	2	35	0	1	0	3	0	0	0	2	0	2	2	0	0	5	1	1	3	0	2	39	1	1	2	0	1	0	0	0	0	0	0	0	0	0
1	2	1	5	7	1	2	2	1	0	3	4	0	0	0	0	0	0	0	1	0	0	0	0	0		2			0	2	14	0	1	3	1
1	1	1	2	2	1	4	1	1	0	4	0	0	0	0	0	0	0	0	0	0	0	0	0	0		2			0	2	6	0	1	3	1
1	2	1	2	7	1	4	1	1	0	5	0	0	0	0	0	0	0	0	0	0	0	0	0	0		2			0	2	21	1	1	2	0	1	0	0	0	0	0	0	0	0	0
1	2	2	5	7	1	2	2	1	0	8	1	0	0	0	0	0	0	0	0	0	0	0	0	0		2			0	2	2	0	2	3	1
1	2	2	3	7	3	2	2	1	3	5	3	3	1	0	5	8	0	0	8	0	3	0	0	3	6	1	1	2	1	2	9	0	1	3	1
1	1	1	3	6	1	4	3	4	0	2	4	0	0	0	0	0	0	0	0	0	0	0	0	0		2			0	2	6	0	1	3	1
1	2	1	3	7	1	1	3	1	0	1	7	0	0	0	0	0	0	0	0	0	0	0	0	0		2			0	2	23	1	1	3	0	1	0	0	0	0	0	0	0	0	0
1	1	1	3	7	1	2	1	4	0	1	8	0	0	0	0	0	0	0	0	2	11	0	1	10		2			0	2	10	0	1	3	1
1	2	2	4	7	2	2	2	5	0	10	10	0	1	0	4	0	0	0	2	3	2	2	0	0	3	1	1	3	0	2	22	1	3	2	0	1	0	0	0	0	0	0	0	0	0
1	2	1	5	7	1	1	3	1	0	0	0	0	0	0	0	0	0	0	1	0	0	0	0	0		1	1	2	1	2	57	0	1	1	0	0
1	2	1	2	6	1	2	2	5	0	8	0	0	0	0	0	0	0	0	0	0	0	0	0	0		2			1	2	27	1	1	1	0	1	0	0	0	0	0	0	0	0	0
1	2	1	3	7	1	1	3	1	0	5	0	0	0	0	0	0	0	0	0	1	0	0	0	0		2			0	2	50	1	1	3	0	1	0	0	1	0	0	0	0	0	0
1	2	1	3	7	1	4	1	4	0	8	0	0	0	0	0	0	0	0	1	0	0	0	0	0		2			1	2	33	1	1	1	0	1	0	0	0	0	0	0	0	0	0
1	2	2	3	7	1	1	3	1	0	2	4	0	0	0	0	0	0	0	1	0	6	6	0	0	5	1	1	2	1	2	47	1	1	1	0	1	0	0	0	0	0	0	0	0	0
2	2	1	3	7	1	2	2	1	0	10	0	0	0	0	0	0	0	0	0	0	0	0	0	0		2			1	2	1	0	1	3	1
1	2	1	2	6	1	2	2	1	0	0	0	0	0	0	0	0	0	0	1	0	0	0	0	0		2			1	2	18	1	1	3	0	1	0	0	0	0	0	0	0	0	0
1	1	1	6	3	1	1	3	1	0	4	2	0	0	0	0	0	0	0	1	0	0	0	0	0		2			1	2	19	1	1	3	0	1	0	1	1	1	0	0	0	1	1	1927	20	1	0
1	2	1	4	7	1	2	2	1	0	0	15	1	0	0	0	0	0	0	1	0	1	1	0	0	4	1	1	1	1	2	44	1	1	3	0	1	1	0	0	0	0	0	0	0	1	267	45	1	0
1	2	1	3	7	1	2	2	1	0	0	0	0	0	0	0	0	0	0	2	1	0	0	0	0		1	1	2	1	2	19	1	1	3	0	1	0	0	0	0	0	0	0	0	0
1	2	1	4	7	1	2	2	4	0	8	0	0	0	0	0	0	0	0	0	0	0	0	0	0		2			1	2	28	1	1	1	0	1	0	0	0	0	0	0	0	0	0
1	2	1	4	2	1	2	2	4	0	0	2	0	0	0	0	0	0	0	0	0	0	0	0	0		2			1	2	10	0	1	3	1
1	2	1	4	7	2	4	2	1	0	7	1	0	1	0	0	0	0	0	1	0	0	0	0	0		2			1	2	37	1	1	1	0	1	0	0	0	0	0	0	0	0	0
1	2	2	6	7	1	2	2	1	0	0	0	0	0	0	0	0	0	0	0	0	0	0	0	0		2			1	2	25	1	2	1	0	1	0	0	0	0	0	0	0	0	0
1	1	1	5	3	1	2	2	1	0	0	0	0	0	0	0	0	0	0	0	0	1	1	0	0	3	1	2	2	1	2	11	0	1	3	1
1	1	1	5	7	1	4	2	1	2	0	0	0	0	0	0	0	0	0	1	1	0	0	0	0		2			1	2	22	1	1	3	0	1	0	0	0	0	0	0	0	0	0
1	2	1	4	7	1	2	2	1	0	0	0	0	0	0	0	1	0	0	1	0	0	0	0	0		2			1	2	38	1	1	1	0	1	0	0	1	0	0	0	0	0	0
3	2	1	2	7	2	2	2	1	0	4	30	0	0	0	6	0	0	0	2	2	7	7	0	0	6	1	2	2	1	2	6	0	1	3	1
1	1	1	4	7	1	1	3	1	0	5	0	0	0	0	0	0	0	0	1	1	6	6	0	0	3	1	1	3	1	2	9	0	1	3	1
1	2	1	3	5	3	2	2	1	0	0	0	0	0	0	0	0	0	0	0	0	0	0	0	0		2			0	2	61	1	1	2	0	1	0	0	0	0	0	0	0	0	0
1	2	1	2	4	3	2	2	1	0	6	0	0	1	0	0	0	0	0	1	0	5	0	0	5	5	1	3	2	0	2	27	1	1	2	0	1	0	0	0	0	0	0	0	0	0
1	2	1	3	5	3	2	2	1	0	20	0	0	5	0	0	5	0	0	3	0	3	0	0	3	3	1	2	2	0	2	48	1	1	2	0	1	0	0	0	0	0	0	0	0	0
1	2	1	3	7	1	2	2	1	4	0	0	0	0	0	0	0	0	0	1	0	0	0	0	0		2			0	2	39	1	1	2	0	1	0	0	0	0	0	0	0	0	0
1	2	1	3	7	1	2	1	1	0	2	0	0	0	0	0	0	0	0	3	4	2	2	0	0	3	1	1	6	0	2	38	1	1	2	0	1	0	0	0	0	0	0	0	0	0
1	2	1	2	7	1	4	1	4	0	0	0	0	0	0	0	0	0	0	0	0	0	0	0	0		2			1	2	11	0	1	3	1
1	2	1	4	7	1	2	2	1	0	0	6	0	0	0	15	0	0	0	2	1	1	1	0	0	5	1	1	3	0	2	56	1	1	3	0	1	0	0	0	0	0	0	0	0	0
1	2	1	5	7	3	2	2	1	0	5	4	0	0	0	4	0	0	0	1	1	3	3	0	0	5	1	3	2	0	2	51	1	1	2	0	1	0	0	0	0	0	0	0	0	0
1	2	1	2	7	2	2	2	5	1	0	0	0	0	0	0	2	0	0	0	0	1	0	0	0		2			0	2	60	1	1	2	0	1	0	0	0	0	0	0	0	0	0
2	2	1	3	6	1	2	2	1	0	0	0	0	0	0	0	0	0	0	0	0	0	0	0	0		2			0	2	38	1	1	2	0	1	0	0	1	0	0	0	0	0	0
1	2	1	5	7	1	2	2	1	0	0	0	0	0	0	0	0	0	0	0	2	0	0	0	0		2			0	2	72	1	1	2	0	1	0	0	0	0	0	0	0	0	0
3	2	1	3	7	1	1	3	1	0	6	0	0	0	0	0	0	0	0	0	0	0	0	0	0		1	1	1	0	2	11	0	1	3	1
1	1	1	4	7	2	2	2	1	0	3	2	0	0	0	0	0	0	0	0	0	1	1	0	0	3	1	1	2	0	2	36	1	1	2	0	1	0	0	0	0	0	0	0	0	0
1	2	1	3	7	1	4	1	1	0	0	1	0	0	0	0	0	0	0	1	0	0	0	0	0		2			1	2	50	1	1	1	0	1	0	0	0	0	0	0	0	0	0
1	2	1	4	7	1	2	1	1	0	20	20	0	0	0	0	0	0	0	1	0	0	0	0	0		2			1	I	41	0	1	1	0	0
1	2	1	4	5	3	2	2	1	2	10	2	0	1	0	0	2	0	0	1	1	2	2	0	0	6	1	1	2	1	2	83	1	1	1	0	1	0	0	0	0	0	0	0	0	0
1	2	1	3	7	1	2	2	1	0	2	10	0	3	0	0	5	3	0	0	1	2	0	2	0		2			1	2	73	1	1	1	0	1	0	0	0	0	0	0	0	0	0
1	2	1	4	4	3	2	2	4	0	15	14	0	1	0	0	17	0	0	1	0	2	2	0	0	5	1	1	2	1	2	34	0	1	1	0	0
1	2	1	4	3	1	1	3	1	0	8	0	0	0	0	0	0	0	0	0	0	2	2	0	0	5	1	1	1	1	2	43	1	1	1	0	1	0	0	0	0	0	0	0	0	0
1	2	1	5	7	1	1	3	1	0	2	4	0	0	0	0	0	0	0	0	0	0	0	0	0		2			0	2	73	1	1	2	0	1	0	0	0	0	0	0	0	0	0
1	2	1	4	3	3	2	2	1	4	0	0	0	0	0	0	0	0	0	0	0	0	0	0	0		2			0	2	59	1	1	2	0	1	0	0	0	0	0	0	0	0	0
1	2	1	6	7	1	2	2	1	0	0	10	0	0	0	0	0	0	0	0	4	0	0	0	0		1	1	2	0	2	56	1	1	2	0	1	0	0	0	0	0	0	0	0	0
1	2	1	2	6	2	4	1	5	0	0	0	0	0	0	0	0	0	0	0	0	0	0	0	0		2			0	2	77	1	1	2	0	1	0	0	0	1	0	1	0	0	1	2841	78	1	1
1	2	1	5	6	1	4	1	4	0	0	0	0	0	0	0	0	0	0	1	0	0	0	0	0		2			0	2	30	1	1	2	0	1	0	0	0	0	0	0	0	0	0
1	2	1	4	5	3	2	2	1	0	8	0	0	2	0	2	6	0	0	1	2	3	3	0	0	5	1	2	2	1	2	65	1	1	1	0	1	0	0	0	0	0	0	0	0	0
1	2	2	4	7	3	2	2	1	0	7	0	0	1	0	0	0	0	0	0	0	5	0	0	0		2			0	2	1	0	2	3	1
1	2	1	2	6	1	4	1	1	0	0	0	0	0	0	0	0	0	0	0	0	0	0	0	0		2			1	2	40	0	1	1	0	0
1	1	1	5	7	1	1	3	1	0	0	0	0	0	0	0	0	0	0	0	0	1	0	1	0		2			0	2	62	1	1	2	0	1	0	0	1	0	0	0	0	0	0
1	2	1	4	7	1	1	3	1	0	10	0	0	0	0	4	0	0	0	0	0	0	0	0	0		2			0	2	50	0	1	3	0	0
1	2	2	5	7	1	1	3	1	0	0	0	0	0	0	0	0	0	0	1	0	0	0	0	0		2			1	2	72	1	1	1	0	1	0	0	1	0	0	0	0	0	0
1	2	1	3	7	1	2	2	1	0	9	0	0	0	0	0	0	0	0	1	3	0	0	0	0		2			1	2	51	1	1	1	0	1	0	0	0	0	0	0	0	0	0
1	1	1	5	7	1	1	3	1	0	3	0	0	0	0	0	0	0	0	0	0	0	0	0	0		2			1	2	17	1	1	3	0	1	0	0	0	0	0	0	0	0	0
1	2	1	4	4	3	4	1	5	2	10	2	0	0	0	0	2	0	0	1	0	1	0	0	1		2			1	2	21	0	1	1	0	0
1	2	1	3	7	1	2	2	1	0	0	0	0	0	0	0	0	0	0	0	0	0	0	0	0		2			0	2	48	1	1	2	0	1	0	0	0	0	0	0	0	0	0
1	2	1	5	7	1	2	2	1	0	4	2	0	0	0	0	0	0	0	0	0	0	0	0	0		2			1	2	61	1	1	1	0	1	0	0	0	0	0	0	0	0	0
1	1	1	5	7	1	2	1	1	4	20	10	0	1	0	8	0	0	0	0	0	5	5	0	0	5	1	1	1	1	2	64	1	1	1	0	1	0	1	0	0	0	0	0	0	1	532	65	1	0
1	2	1	4	7	1	2	1	1	0	0	0	0	0	0	0	0	0	0	0	0	0	0	0	0		2			1	2	53	0	1	1	0	0
1	2	1	4	7	1	2	2	1	0	0	1	0	3	0	0	0	0	0	1	0	1	1	0	0	3	1	1	2	1	2	50	1	1	1	0	1	0	0	0	0	0	0	0	0	0
1	2	2	5	7	1	1	3	1	0	0	0	0	0	0	0	0	0	0	0	0	0	0	0	0		2			0	2	72	1	1	2	0	1	0	0	1	0	0	0	0	0	0
1	2	2	4	7	1	2	2	1	0	0	0	0	0	0	0	0	0	0	2	0	2	0	2	0	5	1	2	3	0	2	63	1	1	2	0	1	0	0	0	0	0	0	0	0	0
1	2	1	3	6	1	2	2	1	0	3	2	0	0	0	0	0	0	0	1	0	0	0	0	0		2			1	2	77	1	1	1	0	1	0	0	0	0	0	0	0	0	0
1	2	1	3	7	2	1	2	1	1	1	15	0	0	0	2	20	0	0	0	0	10	0	0	10	5	1	2	2	1	2	39	1	1	1	0	1	0	0	0	0	0	0	0	0	0
1	2	2	5	7	2	2	2	1	0	0	0	0	0	0	0	0	0	0	4	2	0	0	0	0		2			0	2	15	1	2	2	0	1	0	0	0	0	0	0	0	0	0
1	2	1	2	5	2	4	1	5	0	4	0	0	0	0	0	0	0	0	0	0	1	0	1	0		2			1	2	65	1	1	1	0	1	0	0	0	0	0	0	0	0	0
1	2	1	5	7	1	2	2	4	0	0	0	0	0	0	0	0	0	0	0	0	0	0	0	0		2			0	2	46	1	1	2	0	1	0	0	0	0	1	0	1	0	1	1737	46	1	0
1	2	1	3	7	1	2	2	1	0	0	0	0	0	0	0	0	0	0	1	1	0	0	0	0		2			0	2	66	1	1	3	0	1	0	0	0	0	0	0	0	0	0
1	2	1	3	6	1	4	2	4	0	0	7	0	0	0	0	0	0	0	0	0	1	1	0	0	5	1	1	1	1	2	42	1	1	1	0	1	0	0	0	0	0	0	0	0	0
1	2	1	4	7	1	2	2	1	0	0	0	0	0	0	0	0	0	0	0	0	0	0	0	0		2			1	2	31	1	1	1	0	1	0	0	0	0	0	0	0	0	0
1	2	1	3	7	3	4	1	1	0	0	0	0	0	0	0	0	0	0	0	0	0	0	0	0		2			1	2	55	1	1	1	0	1	1	0	0	0	0	0	0	0	1	2240	56	1	1
1	2	1	4	7	2	2	2	1	0	50	6	4	0	0	20	80	0	0	1	1	0	0	0	0		2			1	2	55	1	1	4	0	1	0	0	0	0	0	0	0	0	0
1	1	1	5	7	1	1	3	1	0	0	0	0	0	0	0	0	0	0	0	0	0	0	0	0		2			1	2	53	1	1	1	0	1	0	0	0	0	0	0	0	0	0
1	2	1	3	7	1	2	2	1	0	5	2	0	0	0	0	0	0	0	0	0	0	0	0	0		2			1	2	76	0	1	1	0	0
1	1	1	4	7	1	1	3	1	0	5	0	0	0	0	0	0	0	0	0	0	0	0	0	0		2			1	2	61	1	1	1	0	1	0	0	0	0	0	0	0	0	0
1	1	2	3	7	3	4	1	1	0	3	0	2	1	0	4	6	0	0	4	0	4	0	0	0		2			1	2	48	1	1	3	0	1	0	0	0	0	0	0	0	0	0
1	2	1	4	7	3	2	2	1	0	0	0	0	0	0	0	0	0	0	0	0	0	0	0	0		2			1	2	83	1	1	1	0	1	0	0	0	0	0	0	0	0	0
1	2	1	3	7	1	2	2	1	2	0	3	0	1	0	0	0	0	0	2	0	3	3	0	0	5	1	2	2	1	2	41	1	1	1	0	1	0	0	0	0	0	0	0	0	0
1	2	1	3	7	3	2	2	4	10	5	0	0	2	0	0	60	0	0	0	0	0	0	0	0		2			1	2	60	1	1	3	0	1	0	0	0	0	0	0	0	0	0
1	2	1	5	7	2	2	2	4	0	0	0	0	0	0	0	0	0	0	1	0	4	0	0	4	5	1	1	2	1	2	22	1	1	6	0	1	0	0	0	0	0	0	0	0	0
1	2	1	3	7	3	2	2	1	0	0	0	0	0	0	2	0	0	0	3	0	0	0	0	0		2			1	2	64	1	1	1	0	1	0	0	0	0	0	0	0	0	0
1	2	1	5	7	2	2	2	1	0	1	0	0	0	0	0	0	0	0	1	0	2	2	0	0	5	1	2	3	1	2	62	1	1	1	0	1	0	0	0	0	0	0	0	0	0
1	2	1	4	7	2	2	2	1	0	10	12	0	7	0	6	0	0	0	1	1	5	5	0	0	5	1	1	3	0	2	64	1	1	2	0	1	0	0	0	0	0	0	0	0	0
1	1	1	5	7	2	2	2	1	2	5	0	0	0	0	0	0	0	0	1	0	0	0	0	0		2			1	2	56	1	1	1	0	1	0	0	0	0	0	0	0	0	0
1	2	2	8	7	2	2	2	1	2	20	16	9	1	0	30	80	1	0	3	1	11	11	0	0	6	1	1	2	1	2	46	1	1	5	0	1	0	0	0	0	0	0	0	0	0
1	2	1	2	7	1	2	2	1	0	0	0	0	0	0	0	0	0	0	0	0	0	0	0	0		2			1	2	71	1	1	1	0	1	0	0	0	0	0	0	0	0	0
1	2	1	3	6	1	4	1	5	0	0	0	0	0	0	0	0	0	0	1	0	0	0	0	0		2			0	2	5	0	1	3	1
1	2	1	3	6	1	4	1	1	0	0	0	0	0	0	0	0	0	0	1	0	0	0	0	0		2			0	3	0		1	8	1
1	2	1	3	7	1	4	1	1	0	0	0	0	0	0	0	0	0	0	3	1	1	0	1	0	3	1	2	2	0	2	73	1	1	2	0	1	0	0	0	0	0	0	0	0	0
1	2	1	5	7	1	2	2	1	0	0	0	0	0	0	0	0	0	0	0	0	0	0	0	0		1	1	1	1	2	53	1	1	1	0	1	0	0	0	0	0	0	0	0	0
1	2	1	3	7	1	2	2	1	0	0	0	0	0	0	0	0	0	0	1	0	1	1	0	0		2			1	2	46	1	1	1	0	1	0	0	0	0	0	0	0	0	0
1	2	2	4	7	1	2	2	1	11	10	0	0	0	0	0	0	0	0	0	1	0	0	0	0		1	1	2	1	2	44	1	1	1	0	1	0	0	0	0	0	0	0	0	0
1	2	1	3	7	2	2	2	1	0	0	0	0	1	0	0	0	0	0	4	0	0	0	0	0		2			1	2	56	1	1	1	0	1	0	0	0	0	0	0	0	0	0
1	2	1	4	7	1	4	1	1	0	6	0	0	0	0	0	0	0	0	0	0	2	2	0	0	6	1	1	2	0	2	47	1	1	2	0	1	0	0	0	0	0	0	0	0	0
1	2	1	3	7	1	2	2	1	0	3	0	0	2	0	6	0	0	0	2	0	1	1	0	0	5	1	1	2	0	2	70	1	1	2	0	1	0	0	0	0	0	0	0	0	0
1	2	1	4	7	1	2	2	1	1	20	19	0	0	0	0	0	0	0	8	0	0	0	0	0		1	2	2	0	2	2	0	1	3	1
1	2	2	4	7	1	1	3	1	0	0	0	0	3	0	0	0	0	0	1	0	0	0	0	0		2			1	2	62	1	1	1	0	1	0	0	0	0	1	0	0	0	0
1	2	1	5	3	3	4	1	1	0	5	2	0	0	0	0	0	0	0	0	0	1	1	0	0	3	1	1	2	1	2	43	1	1	1	0	1	0	0	0	0	0	0	0	0	0
1	2	1	4	7	3	2	2	1	0	0	0	0	0	0	0	0	0	0	1	0	1	1	0	0	6	1	1	2	1	2	51	1	1	1	0	1	0	0	0	0	0	0	0	0	0
1	2	1	3	7	1	2	2	1	0	6	10	0	0	0	0	0	0	0	0	0	0	0	0	0		2			1	2	49	1	1	1	0	1	0	0	0	0	0	0	0	0	0
1	2	1	3	7	3	2	2	1	0	4	2	0	0	0	0	0	0	0	0	0	0	0	0	0		2			0	2	81	1	1	2	0	1	0	0	0	0	0	0	0	0	0
1	2	1	4	7	3	2	1	1	6	10	15	0	1	0	2	0	0	0	1	1	0	0	0	0		2			1	2	59	1	1	1	0	1	0	0	0	0	0	0	0	0	0
1	2	1	3	7	1	2	2	1	0	0	0	0	0	0	0	0	0	0	1	0	0	0	0	0		2			1	2	59	1	1	4	0	1	0	0	1	0	0	0	0	0	0
1	1	1	6	7	1	2	2	1	0	0	0	0	0	0	0	0	0	0	0	0	0	0	0	0		2			1	1	87	1	1	5	0	1	0	0	0	0	0	0	0	0	0
1	1	1	5	7	1	1	3	1	0	0	0	0	0	0	0	0	0	0	0	0	0	0	0	0		2			1	2	55	1	1	1	0	1	0	0	0	0	0	0	0	0	0
1	2	1	3	4	3	2	2	5	14	7	3	2	2	0	2	50	4	0	2	0	5	0	0	5	5	1	3	2	0	2	26	1	1	2	0	1	0	0	0	0	0	0	0	0	0
1	2	1	5	7	1	2	1	1	0	4	0	0	0	0	0	0	0	0	0	0	1	1	0	0	5	1	1	2	0	2	8	0	1	3	1
1	2	1	3	7	2	2	2	1	0	0	0	0	1	0	0	0	0	0	4	0	0	0	0	0		1	2	2	1	2	65	1	1	1	0	1	0	1	1	0	0	0	0	0	1	2929	65	0
1	2	2	5	5	2	2	2	1	0	10	5	0	2	0	2	0	0	0	1	0	2	2	0	0	3	1	1	2	1	2	28	1	2	3	0	1	0	0	0	0	0	0	0	0	0
1	2	2	6	5	3	2	2	1	4	4	4	0	3	0	0	10	0	0	2	1	0	0	0	0		2			1	2	33	1	1	3	0	1	0	0	0	0	0	0	0	0	0
1	2	2	6	7	1	2	2	1	0	0	6	0	0	0	0	0	0	0	0	0	3	3	0	0	6	1	1	2	1	2	53	1	1	1	0	1	0	0	0	0	0	0	0	0	0
1	2	2	3	7	3	2	2	1	0	5	0	0	0	0	0	3	0	0	0	0	0	0	0	0		2			0	2	37	1	2	2	0	1	0	0	0	0	0	0	0	0	0
1	1	1	7	6	1	1	3	1	0	0	0	0	0	0	0	0	0	0	1	0	0	0	0	0		2			0	2	59	1	1	2	0	1	0	0	0	0	0	0	0	0	0
1	2	1	2	5	2	2	2	1	0	0	0	0	0	0	0	2	0	0	1	0	0	0	0	0		2			1	2	38	1	1	1	0	1	0	0	0	0	0	0	0	0	0
1	2	1	4	7	2	2	2	1	0	15	10	0	3	0	0	0	0	0	0	0	7	7	0	0	3	1	1	2	1	2	46	1	1	1	0	1	0	0	1	0	0	0	0	0	0
1	2	2	4	7	2	2	2	1	0	0	0	0	0	0	0	0	0	0	0	0	0	0	0	0		2			1	2	60	1	1	1	0	1	0	0	0	0	0	0	0	0	0
1	2	1	5	7	3	2	2	1	0	4	6	0	0	0	0	0	0	0	1	1	3	0	0	3	5	1	1	2	1	2	53	1	1	1	0	1	0	0	0	0	0	0	0	0	0
1	2	1	5	7	1	2	1	1	0	4	0	0	0	0	0	0	0	0	0	0	1	1	0	0	5	1	1	2	1	2	36	1	1	1	0	1	0	0	0	0	0	0	0	0	0
1	2	1	3	7	1	4	1	1	0	0	0	0	0	0	0	0	0	0	0	3	0	0	0	0		2			1	2	37	1	1	1	0	1	0	0	0	0	0	0	0	0	0
1	2	2	6	7	2	2	2	1	10	10	20	0	1	0	4	60	0	0	0	6	10	2	0	8	6	1	2	2	0	2	80	1	1	2	0	1	0	0	0	0	0	0	0	0	0
1	2	1	3	7	1	4	1	1	0	0	0	0	0	0	0	0	0	0	0	0	0	0	0	0		2			0	2	75	1	1	2	0	1	0	0	0	0	0	0	0	0	0
1	1	1	3	7	3	1	2	1	0	8	12	0	0	0	0	0	0	0	1	0	0	0	0	0		2			1	2	49	1	1	1	0	1	0	0	0	0	0	0	0	0	0
1	2	1	5	7	1	4	2	1	3	4	2	0	0	0	0	0	0	0	2	0	0	0	0	0		2			0	2	52	1	1	2	0	1	0	0	0	0	0	0	0	0	0
1	2	1	3	7	3	2	2	1	0	7	2	0	0	0	0	0	0	0	1	1	2	2	0	0	5	1	3	2	1	2	56	1	1	1	0	1	0	0	0	0	0	0	0	0	0
1	1	1	7	7	1	1	3	1	0	0	0	0	0	0	0	0	0	0	0	0	0	0	0	0		2			1	2	60	1	1	1	0	1	0	0	0	0	0	0	0	0	0
1	2	2	4	4	3	2	2	5	0	6	3	0	1	0	0	20	2	0	3	2	5	0	0	5	3	1	1	2	1	2	83	1	1	1	0	1	0	0	0	0	0	0	0	0	0
1	2	2	3	5	3	2	2	1	1	0	0	0	1	0	0	0	0	0	1	0	3	2	1	0	5	1	2	6	1	2	27	0	2	1	0	0
1	2	2	5	5	2	2	2	1	0	10	5	0	2	0	2	0	0	0	1	0	2	2	0	0	3	1	1	2	1	2	55	1	1	1	0	1	0	0	1	0	0	0	0	0	0
1	2	1	4	7	3	4	1	1	0	0	0	0	0	0	0	4	0	0	0	3	0	0	0	0		2			1	2	66	1	1	1	0	1	0	0	0	0	0	0	0	0	0
1	2	1	2	6	1	4	1	5	0	0	0	0	0	0	0	0	0	0	0	0	0	0	0	0		2			1	2	76	1	1	1	0	1	0	0	0	0	0	0	0	0	0
1	2	1	3	7	2	2	2	1	0	1	0	0	0	0	0	0	0	0	1	1	0	0	0	0		2			1	2	56	1	1	1	0	1	0	0	0	0	0	0	0	0	0
1	2	2	3	7	1	1	3	1	0	10	0	0	0	0	0	0	0	0	2	2	0	0	0	0		1	1	3	0	2	56	1	1	2	0	1	0	1	0	0	0	0	0	1	1	349	56	1	0
1	2	2	3	7	1	2	2	1	0	0	0	0	0	0	0	0	0	0	3	0	0	0	0	0		2			1	2	77	1	1	1	0	1	0	0	0	0	0	0	0	0	0
1	2	1	4	7	1	2	2	1	0	5	0	0	0	0	0	0	0	0	1	0	1	1	0	0	3	1	2	2	1	2	36	1	1	1	0	1	0	0	0	0	0	0	1	0	0
1	2	2	5	7	1	1	3	1	0	1	3	0	0	0	0	0	0	0	4	0	9	9	0	0	5	1	1	3	1	2	20	0	1	3	0	0
1	2	2	5	7	1	2	2	1	0	7	0	0	0	0	0	0	0	0	2	0	2	2	0	0	5	1	1	3	0	2	8	0	1	3	1
1	1	1	4	5	3	1	3	1	0	0	0	0	0	0	0	0	0	0	1	0	0	0	0	0		2			0	2	41	1	1	2	0	1	0	0	0	0	0	0	0	0	0
1	2	1	4	2	1	2	2	1	0	0	0	0	0	0	0	0	0	0	0	0	0	0	0	0		2			1	2	38	1	1	1	0	1	0	0	0	0	0	0	0	0	0
1	2	1	2	7	1	4	1	5	0	4	4	0	0	0	0	0	0	0	2	1	0	0	0	0		2			1	2	4	0	1	3	1
1	2	1	3	7	1	2	2	5	2	1	2	0	0	0	0	0	0	0	1	0	0	0	0	0		2			0	2	16	1	1	3	0	1	0	0	0	0	0	0	0	0	0
1	2	1	3	7	1	2	2	1	0	0	5	0	0	0	0	0	0	0	0	0	0	0	0	0		1	2	3	0	2	4	0	1	3	1
1	2	1	3	7	1	2	2	5	2	1	2	0	0	0	0	0	0	0	1	0	0	0	0	0		2			1	2	10	0	1	3	1
1	2	2	7	6	1	2	2	1	0	30	0	0	0	0	0	0	0	0	2	1	0	0	0	0		2			0	2	49	1	1	3	0	1	0	0	0	0	0	0	0	0	0
1	2	1	6	7	1	1	3	1	0	4	2	0	0	0	0	0	0	0	1	5	0	0	0	0		2			0	2	11	0	1	3	1
1	2	2	5	7	1	1	3	1	0	0	0	0	0	0	0	0	0	0	0	0	0	0	0	0		2			0	2	34	1	2	2	0	1	0	0	0	0	0	0	0	0	0
1	2	2	4	7	3	2	2	1	0	11	0	0	0	0	0	5	0	0	1	1	13	13	0	0	3	1	1	2	0	2	56	1	1	2	0	1	0	0	0	0	0	0	0	0	0
1	1	1	5	7	1	2	2	1	0	8	2	0	0	0	0	0	0	0	1	0	0	0	0	0		2			0	2	58	1	2	3	0	1	0	0	0	0	0	0	0	0	0
1	2	1	5	7	1	2	2	1	0	0	0	0	1	0	0	0	0	0	0	0	0	0	0	0		2			0	2	60	1	1	5	0	1	0	0	0	0	0	0	0	0	0
1	2	2	4	7	1	2	2	1	0	5	9	0	0	0	0	0	0	0	1	1	4	4	0	0		2			1	2	84	1	1	1	0	1	0	0	0	0	0	0	1	0	0
1	2	1	4	7	1	1	3	1	0	11	6	0	0	0	0	0	0	0	0	0	0	0	0	0		2			1	2	63	1	1	1	0	1	0	0	0	0	0	0	0	0	0
1	2	1	4	7	2	2	2	1	0	11	0	0	0	0	0	0	0	0	1	1	9	0	0	9	4	1	2	2	1	2	52	1	1	1	0	1	0	0	0	0	0	0	0	0	0
1	1	1	5	7	1	1	3	1	1	0	1	0	0	0	0	0	0	0	2	1	4	4	0	0	6	1	1	2	1	2	79	1	1	4	0	1	0	0	0	0	0	0	0	0	0
1	2	1	4	7	3	2	2	1	1	0	0	0	0	0	2	0	0	0	1	0	0	0	0	0		1	2	2	1	2	12	0	1	8	1
1	2	1	4	7	1	4	1	1	0	2	2	0	0	0	0	0	0	0	0	0	0	0	0	0		2			1	2	62	1	1	1	0	1	0	1	0	0	0	1	0	0	1	3653	63	1	0
1	1	1	2	7	1	2	2	1	0	0	0	0	0	0	0	0	0	0	0	0	0	0	0	0		2			1	2	49	1	1	1	0	1	0	0	0	0	0	0	0	0	0
1	2	1	5	7	2	2	2	1	0	6	4	0	0	0	0	60	0	0	1	1	6	6	0	0	6	1	1	2	0	2	68	1	1	2	0	1	0	0	0	0	0	0	0	0	0
1	2	1	5	7	2	2	2	1	0	5	0	0	2	0	2	10	0	0	1	0	12	11	0	1	3	1	1	2	0	2	48	1	1	2	0	1	0	0	0	0	0	0	0	0	0
1	2	1	2	5	3	4	1	1	0	3	2	0	3	0	3	0	7	0	1	1	2	2	0	0	5	1	2	2	1	2	64	1	1	1	0	1	0	0	0	0	0	0	0	0	0
1	2	1	6	7	1	2	1	1	0	6	5	0	0	0	0	0	0	0	1	1	0	0	0	0		1	1	3	1	2	40	1	1	1	0	1	0	0	0	0	0	0	0	0	0
1	2	1	4	7	3	2	2	1	0	4	0	0	0	0	0	0	0	0	1	0	4	2	0	2	4	1	1	2	0	2	53	0	1	2	0	0
1	2	1	3	7	3	1	3	1	0	11	2	0	0	0	0	0	0	0	1	0	3	3	0	0	3	1	2	2	0	2	36	1	1	2	0	1	0	0	1	0	0	0	0	0	0
1	2	1	4	7	1	2	2	1	2	1	9	0	0	0	0	0	0	0	3	1	1	1	0	0	3	1	1	2	0	I	92	1	1	4	0	1	0	0	0	0	0	0	0	0	0
1	1	2	5	7	1	4	1	1	0	15	1	0	0	0	0	0	0	0	1	0	1	1	0	0	3	1	2	2	0	2	22	1	2	2	0	1	0	0	0	0	0	0	0	0	0
[truncated: 32,831 more rows]
[truncated: 41 more columns]
